# Supplementary material for: Species Traits Drive Long-Term Population Trends of Common Breeding Birds in Northern Italy
Source: MDPI journal article supplement (doi:10.3390/ani11123426), 2021-12-01

# Species traits drive long-term population trends of common breeding birds in Northern Italy

Pietro Tirozzi <sup>1</sup>, Valerio Orioli <sup>1</sup>, Olivia Dondina <sup>1</sup>, Leila Kataoka <sup>1</sup>, Luciano Bani <sup>1,2\*</sup>

1 Department of Earth and Environmental Sciences, University of Milano-Bicocca, Piazza della Scienza 1, 20126 Milano, Italy; [p.tirozzi@campus.unimib.it](mailto:p.tirozzi@campus.unimib.it); [valerio.orioli@unimib.it](mailto:valerio.orioli@unimib.it); [olivia.dondina@unimib.it](mailto:olivia.dondina@unimib.it); [l.kataoka@campus.unimib.it](mailto:l.kataoka@campus.unimib.it);

2 World Biodiversity Association Onlus c/o NATLAB Forte Inglese, Portoferraio, 57037 Livorno, Italy;

\* Correspondence: [luciano.bani@unimib.it](mailto:luciano.bani@unimib.it)

## **Supplementary Materials**

### **List of Contents**

Table S1. Number of point counts surveyed per year.

Table S2. Monitoring programs from which bird data were derived.

Table S3. Life history and ecological traits of the studied species.

Figure S1. Cramer's V coefficients of the traits originally considered in the analysis.

Table S4. Explained deviance (%) and the Akaike Information Criterion (AIC) of the models performed for the 76 studied species.

Table S5. Summary of models performed for each species.

Figure S2. Plot of population indices with confidence intervals and regression line for the 76 studied species.

**Table S1. Number of point counts surveyed per year.**

| Year of survey | N of point counts |
|----------------|-------------------|
| 1992           | 373               |
| 1993           | -                 |
| 1994           | -                 |
| 1995           | 650               |
| 1996           | 696               |
| 1997           | -                 |
| 1998           | -                 |
| 1999           | 1103              |
| 2000           | 1443              |
| 2001           | 993               |
| 2002           | 593               |
| 2003           | 603               |
| 2004           | 401               |
| 2005           | 1092              |
| 2006           | 1051              |
| 2007           | 730               |
| 2008           | 704               |
| 2009           | 758               |
| 2010           | 744               |
| 2011           | 898               |
| 2012           | 766               |
| 2013           | 795               |
| 2014           | 886               |
| 2015           | 805               |
| 2016           | 799               |
| 2017           | 542               |
| 2018           | 538               |
| 2019           | 542               |

**Table S2. Monitoring programs from which bird data were derived.**

| Project name                 | Project goal                                   | Years                      | Sampling design                                                                                                      | Number of point counts |
|------------------------------|------------------------------------------------|----------------------------|----------------------------------------------------------------------------------------------------------------------|------------------------|
| Long-term Monitoring Program | Long-term survey at regional scale             | 1992, 1995-1996, 2005-2006 | Stratified random sampling according to the different landscapes in the Region.                                      | 2756                   |
|                              |                                                | 2007-2016                  | Stratified random sampling with random and fixed sampling units according to the different landscapes in the Region. | 7885                   |
|                              |                                                | 2017-2019                  | Stratified random sampling with fixed sampling units according to the different landscapes in the Region.            | 1622                   |
| Forest Biodiversity Survey   | Survey of forest habitats                      | 1999-2004                  | Random sampling in woodlands.                                                                                        | 1903                   |
| Lowland Biodiversity Survey  | Survey of agricultural habitats                | 2000-2002                  | Random sampling in agricultural lands.                                                                               | 952                    |
| Regional Fauna Database      | Survey at regional scale                       | 2000-2006                  | Systematic stratified sampling at regional scale.                                                                    | 3240                   |
| Greenway Project             | Survey of Lombard Apennines to draw a greenway | 2002-2003                  | Random sampling along river corridors in the Apennine zone.                                                          | 147                    |

**Table S3. Life history and ecological traits of the studied species.** For definition of levels and thresholds of each trait, see Section 2.4.1 in the main text. For traits not used in trait-based analysis: Fledging period (Short:  $\leq 14$ , Intermediate:  $> 14$  and  $< 26$ , Long:  $\geq 26$ ) and Body mass (Low:  $\leq 15.64$ , Intermediate:  $> 15.64$  and  $< 149.10$ , High:  $\geq 149.10$ ) were derived from [90]. Nesting habitat was derived from [92] and expert-based revised in relation to preferences of the species in the study area.

| Species                                                    | Dispersal ratio | Annual fecundity | Incubation period | Fledging period | Migration strategy | Diet         | Nest type       | Altitudinal range (meters a.s.l.) | Landscape type | Nesting habitat | Overall specialization index | Body mass    |
|------------------------------------------------------------|-----------------|------------------|-------------------|-----------------|--------------------|--------------|-----------------|-----------------------------------|----------------|-----------------|------------------------------|--------------|
| Great Cormorant ( <i>Phalacrocorax carbo</i> )             | Low             | Low              | Long              | Long            | Sedentary          | Vertebrates  | Elevated-nester | Plain ( $\leq 200$ )              | Farmland       | Water           | High                         | High         |
| Black-crowned Night Heron ( <i>Nycticorax nycticorax</i> ) | High            | Low              | Long              | Long            | Long-distance      | Vertebrates  | Elevated-nester | Plain ( $\leq 200$ )              | Farmland       | Water           | Intermediate                 | High         |
| Little Egret ( <i>Egretta garzetta</i> )                   | High            | Low              | Long              | Long            | Short-distance     | Omnivores    | Elevated-nester | Plain ( $\leq 200$ )              | Farmland       | Water           | Intermediate                 | High         |
| Grey Heron ( <i>Ardea cinerea</i> )                        | High            | Low              | Long              | Long            | Short-distance     | Vertebrates  | Elevated-nester | Plain ( $\leq 200$ )              | Farmland       | Water           | Intermediate                 | High         |
| Mallard ( <i>Anas platyrhynchos</i> )                      | Low             | High             | Long              | Long            | Short-distance     | Omnivores    | Ground-nester   | Plain ( $\leq 200$ )              | Farmland       | Several         | Low                          | High         |
| Black Kite ( <i>Milvus migrans</i> )                       | High            | Low              | Long              | Long            | Long-distance      | Vertebrates  | Elevated-nester | Hill (201-700)                    | Several        | Forest          | Intermediate                 | High         |
| Common Buzzard ( <i>Buteo buteo</i> )                      | High            | Low              | Long              | Long            | Short-distance     | Vertebrates  | Elevated-nester | Hill (201-700)                    | Several        | Forest          | Intermediate                 | High         |
| Common Kestrel ( <i>Falcon tinnunculus</i> )               | High            | Low              | Long              | Long            | Short-distance     | Vertebrates  | Hole-nester     | Plain ( $\leq 200$ )              | Farmland       | Several         | Low                          | High         |
| Common Quail ( <i>Coturnix coturnix</i> )                  | Low             | Intermediate     | Long              | Intermediate    | Long-distance      | Plant-eaters | Ground-nester   | Plain ( $\leq 200$ )              | Farmland       | Open            | High                         | Intermediate |

|                                                            |              |              |              |              |                |               |                 |                |          |         |              |              |
|------------------------------------------------------------|--------------|--------------|--------------|--------------|----------------|---------------|-----------------|----------------|----------|---------|--------------|--------------|
| Common Pheasant<br>( <i>Phasianus colchicus</i> )          | Low          | High         | Long         | Short        | Sedentary      | Plant-eaters  | Ground-nester   | Plain (≤ 200)  | Farmland | Forest  | High         | High         |
| Common Moohren<br>( <i>Gallinula chloropus</i> )           | Low          | High         | Long         | Long         | Short-distance | Omnivores     | Ground-nester   | Plain (≤ 200)  | Farmland | Water   | Intermediate | High         |
| Northern Lapwing<br>( <i>Vanellus vanellus</i> )           | High         | Low          | Long         | Long         | Short-distance | Invertebrates | Ground-nester   | Plain (≤ 200)  | Farmland | Open    | High         | High         |
| Feral Pigeon<br>( <i>Columba livia domestica</i> )         | Intermediate | Intermediate | Long         | Long         | Sedentary      | Plant-eaters  | Hole-nester     | Plain (≤ 200)  | Farmland | Several | High         | High         |
| Common Wood Pigeon<br>( <i>Columba palumbus</i> )          | Intermediate | Low          | Intermediate | Long         | Short-distance | Plant-eaters  | Elevated-nester | Plain (≤ 200)  | Farmland | Several | Intermediate | High         |
| Eurasian Collared Dove<br>( <i>Streptopelia decaocto</i> ) | Intermediate | Intermediate | Intermediate | Intermediate | Sedentary      | Plant-eaters  | Elevated-nester | Plain (≤ 200)  | Farmland | Urban   | High         | High         |
| European Turtle Dove<br>( <i>Streptopelia turtur</i> )     | Intermediate | Low          | Intermediate | Intermediate | Long-distance  | Plant-eaters  | Elevated-nester | Plain (≤ 200)  | Farmland | Shrubs  | High         | Intermediate |
| Common Cuckoo<br>( <i>Cuculus canorus</i> )                | High         | Intermediate | Short        | Intermediate | Long-distance  | Invertebrates | Elevated-nester | Hill (201-700) | Several  | Several | Intermediate | Intermediate |
| Common Swift<br>( <i>Apus apus</i> )                       | High         | Low          | Long         | Long         | Long-distance  | Invertebrates | Hole-nester     | Plain (≤ 200)  | Several  | Urban   | High         | Intermediate |
| European Bee-eater<br>( <i>Merops apiaster</i> )           | High         | Intermediate | Long         | Long         | Long-distance  | Invertebrates | Hole-nester     | Plain (≤ 200)  | Farmland | Water   | High         | Intermediate |
| Eurasian Wryneck<br>( <i>Jinx torquilla</i> )              | Low          | Intermediate | Short        | Intermediate | Long-distance  | Invertebrates | Hole-nester     | Hill (201-700) | Farmland | Open    | High         | Intermediate |

|                                                           |              |              |              |              |                |               |               |                            |                      |         |              |              |
|-----------------------------------------------------------|--------------|--------------|--------------|--------------|----------------|---------------|---------------|----------------------------|----------------------|---------|--------------|--------------|
| European Green Woodpecker<br>( <i>Picus viridis</i> )     | Low          | Intermediate | Long         | Intermediate | Sedentary      | Invertebrates | Hole-nester   | Hill<br>(201-700)          | Several              | Forest  | Intermediate | High         |
| Great Spotted Woodpecker<br>( <i>Dendrocopos major</i> )  | Intermediate | Intermediate | Short        | Intermediate | Sedentary      | Omnivores     | Hole-nester   | Hill<br>(201-700)          | Several              | Forest  | Intermediate | Intermediate |
| Eurasian Skylark<br>( <i>Alauda arvensis</i> )            | Intermediate | High         | Short        | Intermediate | Short-distance | Omnivores     | Ground-nester | Plain<br>(≤ 200)           | Farmland             | Open    | Intermediate | Intermediate |
| Eurasian Crag Martin<br>( <i>Ptyonoprogne rupestris</i> ) | High         | Intermediate | Intermediate | Long         | Sedentary      | Invertebrates | Hole-nester   | Low Mountain<br>(701-1500) | Woodland             | Urban   | High         | Intermediate |
| Barn Swallow<br>( <i>Hirundo rustica</i> )                | High         | High         | Intermediate | Intermediate | Long-distance  | Invertebrates | Hole-nester   | Plain<br>(≤ 200)           | Farmland             | Open    | High         | Intermediate |
| Common House Martin<br>( <i>Delichon urbicum</i> )        | High         | Intermediate | Intermediate | Long         | Long-distance  | Invertebrates | Hole-nester   | Plain<br>(≤ 200)           | Several              | Urban   | High         | Intermediate |
| Tree Pipit<br>( <i>Anthus trivialis</i> )                 | Intermediate | Intermediate | Short        | Short        | Long-distance  | Omnivores     | Ground-nester | High Mountain<br>(>1500)   | Several              | Shrubs  | Low          | Intermediate |
| Water Pipit<br>( <i>Anthus spinoletta</i> )               | Intermediate | Intermediate | Intermediate | Intermediate | Short-distance | Invertebrates | Ground-nester | High Mountain<br>(>1500)   | Natural Open-Habitat | Open    | High         | Intermediate |
| Western Yellow Wagtail<br>( <i>Motacilla flava</i> )      | Intermediate | Low          | Short        | Intermediate | Long-distance  | Invertebrates | Ground-nester | Plain<br>(≤ 200)           | Farmland             | Open    | Intermediate | Intermediate |
| Grey Wagtail<br>( <i>Motacilla cinerea</i> )              | Intermediate | Intermediate | Short        | Short        | Short-distance | Invertebrates | Hole-nester   | Low Mountain<br>(701-1500) | Several              | Water   | Intermediate | Intermediate |
| White Wagtail<br>( <i>Motacilla alba</i> )                | Intermediate | High         | Short        | Short        | Short-distance | Invertebrates | Hole-nester   | Hill<br>(201-700)          | Several              | Several | Low          | Intermediate |
| Eurasian Wren<br>( <i>Troglodytes troglodytes</i> )       | Low          | High         | Intermediate | Intermediate | Short-distance | Omnivores     | Hole-nester   | Low Mountain<br>(701-1500) | Woodland             | Forest  | Intermediate | Low          |

|                                                        |              |              |              |              |                |               |                 |                         |                      |         |              |              |
|--------------------------------------------------------|--------------|--------------|--------------|--------------|----------------|---------------|-----------------|-------------------------|----------------------|---------|--------------|--------------|
| Dunnock<br>( <i>Prunella modularis</i> )               | Low          | Intermediate | Short        | Short        | Short-distance | Omnivores     | Elevated-nester | High Mountain (> 1500)  | Natural Open-Habitat | Shrubs  | Intermediate | Intermediate |
| European Robin<br>( <i>Erithacus rubecula</i> )        | Low          | Intermediate | Intermediate | Short        | Short-distance | Omnivores     | Hole-nester     | Low Mountain (701-1500) | Woodland             | Forest  | Low          | Intermediate |
| Common Nigthingale<br>( <i>Luscinia megarhynchos</i> ) | Intermediate | Intermediate | Short        | Short        | Long-distance  | Invertebrates | Ground-nester   | Plain ( $\leq 200$ )    | Farmland             | Shrubs  | Low          | Intermediate |
| Black Redstart<br>( <i>Phoenicurus ochruros</i> )      | High         | Intermediate | Intermediate | Intermediate | Short-distance | Omnivores     | Hole-nester     | High Mountain (> 1500)  | Natural Open-Habitat | Open    | High         | Intermediate |
| Common Redstart<br>( <i>Phoenicurus Phoenicurus</i> )  | Intermediate | High         | Short        | Intermediate | Long-distance  | Invertebrates | Hole-nester     | Hill (201-700)          | Woodland             | Several | Low          | Intermediate |
| African Stonechat<br>( <i>Saxicola torquatus</i> )     | Low          | High         | Intermediate | Short        | Short-distance | Invertebrates | Ground-nester   | Plain ( $\leq 200$ )    | Farmland             | Open    | High         | Low          |
| Northern Wheatear<br>( <i>Oenanthe oenanthe</i> )      | High         | Intermediate | Short        | Intermediate | Long-distance  | Invertebrates | Hole-nester     | High Mountain (> 1500)  | Natural Open-Habitat | Open    | Intermediate | Intermediate |
| Common Blackbird<br>( <i>Turdus merula</i> )           | Low          | Intermediate | Short        | Short        | Sedentary      | Omnivores     | Elevated-nester | Hill (201-700)          | Several              | Several | Low          | Intermediate |
| Song Thrush<br>( <i>Turdus philomelos</i> )            | Low          | Intermediate | Short        | Short        | Short-distance | Omnivores     | Elevated-nester | Low Mountain (701-1500) | Woodland             | Forest  | Intermediate | Intermediate |
| Mistle Trush<br>( <i>Turdus viscivorus</i> )           | Intermediate | Intermediate | Intermediate | Short        | Short-distance | Omnivores     | Elevated-nester | High Mountain (> 1500)  | Several              | Shrubs  | Intermediate | Intermediate |
| Cetti's Warbler<br>( <i>Cettia cetti</i> )             | Low          | Intermediate | Intermediate | Intermediate | Sedentary      | Invertebrates | Elevated-nester | Plain ( $\leq 200$ )    | Farmland             | Shrubs  | Intermediate | Low          |
| Melodius Warbler<br>( <i>Hippolais polyglotta</i> )    | Intermediate | Low          | Short        | Short        | Long-distance  | Invertebrates | Elevated-nester | Plain ( $\leq 200$ )    | Farmland             | Shrubs  | Low          | Low          |



|                                                              |              |              |              |              |                |               |                 |                         |                      |         |              |              |
|--------------------------------------------------------------|--------------|--------------|--------------|--------------|----------------|---------------|-----------------|-------------------------|----------------------|---------|--------------|--------------|
| Lesser Whitethroat<br>( <i>Curruca curruca</i> )             | Intermediate | Low          | Short        | Short        | Long-distance  | Omnivores     | Elevated-nester | High Mountain (> 1500)  | Natural Open-Habitat | Shrubs  | Low          | Low          |
| Eurasian Blackcap<br>( <i>Sylvia atricapilla</i> )           | Low          | Low          | Short        | Short        | Short-distance | Omnivores     | Elevated-nester | Hill (201-700)          | Several              | Several | Intermediate | Intermediate |
| Western Bonelli's Warbler<br>( <i>Phylloscopus bonelli</i> ) | Intermediate | Intermediate | Short        | Short        | Long-distance  | Invertebrates | Ground-nester   | Low Mountain (701-1500) | Woodland             | Shrubs  | Intermediate | Low          |
| Common Chiffchaff<br>( <i>Phylloscopus collybita</i> )       | Intermediate | High         | Intermediate | Intermediate | Short-distance | Invertebrates | Ground-nester   | Low Mountain (701-1500) | Woodland             | Forest  | Intermediate | Low          |
| Goldcrest<br>( <i>Regulus regulus</i> )                      | Intermediate | High         | Intermediate | Intermediate | Short-distance | Invertebrates | Elevated-nester | Low Mountain (701-1500) | Woodland             | Forest  | High         | Low          |
| Common Firecrest<br>( <i>Regulus ignicapilla</i> )           | Intermediate | High         | Intermediate | Intermediate | Short-distance | Invertebrates | Elevated-nester | Low Mountain (701-1500) | Woodland             | Forest  | Intermediate | Low          |
| Spotted Flycatcher<br>( <i>Muscicapa striata</i> )           | High         | Intermediate | Short        | Short        | Long-distance  | Invertebrates | Elevated-nester | Hill (201-700)          | Several              | Several | Intermediate | Intermediate |
| Long-tailed Tit<br>( <i>Aegithalos caudatus</i> )            | Intermediate | Intermediate | Intermediate | Intermediate | Sedentary      | Omnivores     | Elevated-nester | Hill (201-700)          | Several              | Forest  | Intermediate | Low          |
| Marsh Tit<br>( <i>Poecile palustris</i> )                    | Intermediate | Intermediate | Intermediate | Intermediate | Sedentary      | Omnivores     | Hole-nester     | Hill (201-700)          | Woodland             | Forest  | Intermediate | Low          |
| Willow Tit ( <i>Poecile montanus</i> )                       | Low          | Intermediate | Intermediate | Intermediate | Sedentary      | Omnivores     | Hole-nester     | High Mountain (> 1500)  | Natural Open-Habitat | Shrubs  | Intermediate | Low          |
| European Crested Tit<br>( <i>Lophophanes cristatus</i> )     | Intermediate | Intermediate | Intermediate | Intermediate | Sedentary      | Omnivores     | Hole-nester     | Low Mountain (701-1500) | Woodland             | Forest  | High         | Low          |

|                                                            |              |              |              |              |                |               |                 |                               |                      |         |              |              |
|------------------------------------------------------------|--------------|--------------|--------------|--------------|----------------|---------------|-----------------|-------------------------------|----------------------|---------|--------------|--------------|
| Coal Tit<br>( <i>Periparus ater</i> )                      | Intermediate | High         | Intermediate | Intermediate | Sedentary      | Omnivores     | Hole-nester     | Low Mountain<br>(701-1500)    | Woodland             | Forest  | Intermediate | Low          |
| Eurasian Blue Tit<br>( <i>Cyanistes caeruleus</i> )        | Intermediate | High         | Intermediate | Intermediate | Sedentary      | Omnivores     | Hole-nester     | Hill<br>(201-700)             | Woodland             | Forest  | Intermediate | Low          |
| Great Tit<br>( <i>Parus major</i> )                        | Intermediate | High         | Intermediate | Intermediate | Sedentary      | Omnivores     | Hole-nester     | Hill<br>(201-700)             | Several              | Several | Intermediate | Intermediate |
| Eurasian Nuthatch<br>( <i>Sitta europea</i> )              | Intermediate | Intermediate | Intermediate | Intermediate | Sedentary      | Invertebrates | Hole-nester     | Hill<br>(201-700)             | Woodland             | Forest  | Intermediate | Intermediate |
| Short-toed Treecreeper<br>( <i>Certhia brachydactyla</i> ) | Intermediate | High         | Intermediate | Intermediate | Sedentary      | Invertebrates | Hole-nester     | Hill<br>(201-700)             | Woodland             | Forest  | Intermediate | Low          |
| Eurasian Golden Oriole<br>( <i>Oriolus oriolus</i> )       | High         | Low          | Intermediate | Intermediate | Long-distance  | Omnivores     | Elevated-nester | Plain<br>( $\leq 200$ )       | Farmland             | Forest  | Low          | Intermediate |
| Red-backed Shrike<br>( <i>Lanius collurio</i> )            | Intermediate | Low          | Intermediate | Intermediate | Long-distance  | Omnivores     | Elevated-nester | Hill<br>(201-700)             | Several              | Shrubs  | Intermediate | Intermediate |
| Eurasian Jay<br>( <i>Garrulus glandarius</i> )             | Intermediate | Intermediate | Intermediate | Long         | Sedentary      | Omnivores     | Elevated-nester | Hill<br>(201-700)             | Woodland             | Forest  | Low          | High         |
| Eurasian Magpie<br>( <i>Pica pica</i> )                    | Intermediate | Intermediate | Long         | Long         | Sedentary      | Omnivores     | Elevated-nester | Plain<br>( $\leq 200$ )       | Farmland             | Several | Low          | High         |
| Carrion Crow<br>( <i>Corvus corone</i> )                   | High         | Low          | Long         | Long         | Sedentary      | Omnivores     | Elevated-nester | High Mountain<br>( $> 1500$ ) | Natural Open-Habitat | Several | Low          | High         |
| Hooded Crow<br>( <i>Corvus cornix</i> )                    | High         | Low          | Long         | Long         | Sedentary      | Omnivores     | Elevated-nester | Plain<br>( $\leq 200$ )       | Farmland             | Several | Low          | High         |
| Common Starling<br>( <i>Sturnus vulgaris</i> )             | Intermediate | Intermediate | Short        | Intermediate | Short-distance | Omnivores     | Hole-nester     | Plain<br>( $\leq 200$ )       | Farmland             | Several | Intermediate | Intermediate |

|                                                      |              |              |       |              |                |              |                 |                            |                      |         |              |              |
|------------------------------------------------------|--------------|--------------|-------|--------------|----------------|--------------|-----------------|----------------------------|----------------------|---------|--------------|--------------|
| Italian Sparrow<br>( <i>Passer italiae</i> )         | Low          | High         | Short | Short        | Sedentary      | Plant-eaters | Hole-nester     | Plain<br>(≤ 200)           | Farmland             | Urban   | Low          | Intermediate |
| Eurasian Tree Sparrow<br>( <i>Passer montanus</i> )  | Low          | High         | Short | Intermediate | Short-distance | Omnivores    | Hole-nester     | Plain<br>(≤ 200)           | Farmland             | Shrubs  | Intermediate | Intermediate |
| Common Chaffinch<br>( <i>Fringilla coelebs</i> )     | Intermediate | Low          | Short | Short        | Short-distance | Omnivores    | Elevated-nester | Hill<br>(201-700)          | Several              | Several | Low          | Intermediate |
| European Serin<br>( <i>Serinus serinus</i> )         | Intermediate | Intermediate | Short | Intermediate | Short-distance | Plant-eaters | Elevated-nester | Hill<br>(201-700)          | Several              | Urban   | Intermediate | Low          |
| European Greenfinch<br>( <i>Chloris chloris</i> )    | Intermediate | Intermediate | Short | Short        | Short-distance | Plant-eaters | Elevated-nester | Plain<br>(≤ 200)           | Farmland             | Urban   | Intermediate | Intermediate |
| European Goldfinch<br>( <i>Carduelis carduelis</i> ) | Intermediate | Intermediate | Short | Intermediate | Short-distance | Plant-eaters | Elevated-nester | Plain<br>(≤ 200)           | Farmland             | Several | Intermediate | Low          |
| Common Linnet<br>( <i>Linaria cannabina</i> )        | Intermediate | High         | Short | Short        | Sedentary      | Plant-eaters | Elevated-nester | High Mountain<br>(> 1500)  | Natural Open-Habitat | Shrubs  | High         | Intermediate |
| Common Redpoll<br>( <i>Acanthis flammea</i> )        | Intermediate | Intermediate | Short | Short        | Sedentary      | Plant-eaters | Elevated-nester | High Mountain<br>(> 1500)  | Natural Open-Habitat | Shrubs  | Low          | Low          |
| Eurasian Bullfinch<br>( <i>Pyrrhula pyrrhula</i> )   | Low          | Intermediate | Short | Intermediate | Short-distance | Plant-eaters | Elevated-nester | Low Mountain<br>(701-1500) | Woodland             | Forest  | Low          | Intermediate |

**Figure S1. Cramer's V coefficients of the traits originally considered in the analysis.** Statistically significant correlations (Chi-square test or Fisher's exact test) are in bold.

|                              | Dispersal ratio |                  |                   |                 |                    |             |             |                   |                |                 |                              |           |
|------------------------------|-----------------|------------------|-------------------|-----------------|--------------------|-------------|-------------|-------------------|----------------|-----------------|------------------------------|-----------|
| Dispersal ratio              | 1               | Annual fecundity |                   |                 |                    |             |             |                   |                |                 |                              |           |
| Annual fecundity             | <b>0.31</b>     | 1                | Incubation period |                 |                    |             |             |                   |                |                 |                              |           |
| Incubation period            | <b>0.36</b>     | <b>0.31</b>      | 1                 | Fledging period |                    |             |             |                   |                |                 |                              |           |
| Fledging period              | <b>0.41</b>     | <b>0.33</b>      | <b>0.63</b>       | 1               | Migration strategy |             |             |                   |                |                 |                              |           |
| Migration strategy           | <b>0.26</b>     | 0.23             | 0.20              | 0.10            | 1                  | Diet        |             |                   |                |                 |                              |           |
| Diet                         | <b>0.36</b>     | <b>0.36</b>      | <b>0.38</b>       | <b>0.35</b>     | <b>0.35</b>        | 1           | Nest type   |                   |                |                 |                              |           |
| Nest type                    | 0.15            | <b>0.34</b>      | 0.17              | 0.21            | 0.21               | 0.29        | 1           | Altitudinal range |                |                 |                              |           |
| Altitudinal                  | 0.19            | 0.24             | <b>0.34</b>       | <b>0.32</b>     | 0.23               | 0.23        | 0.24        | 1                 | Landscape type |                 |                              |           |
| Landscape type               | 0.21            | <b>0.31</b>      | <b>0.39</b>       | 0.28            | 0.18               | 0.23        | 0.25        | <b>0.81</b>       | 1              | Nesting habitat |                              |           |
| Nesting habitat              | 0.31            | 0.25             | <b>0.47</b>       | <b>0.50</b>     | <b>0.33</b>        | <b>0.38</b> | <b>0.40</b> | <b>0.50</b>       | <b>0.50</b>    | 1               | Overall specialization index |           |
| Overall specialization index | 0.13            | 0.10             | <b>0.27</b>       | <b>0.30</b>     | 0.16               | <b>0.29</b> | 0.18        | 0.26              | 0.21           | <b>0.44</b>     | 1                            | Body mass |
| Body mass                    | <b>0.31</b>     | <b>0.33</b>      | <b>0.61</b>       | <b>0.55</b>     | <b>0.27</b>        | <b>0.39</b> | 0.19        | <b>0.34</b>       | <b>0.39</b>    | <b>0.44</b>     | 0.16                         | 1         |

**Table S4. Explained deviance (%) and the Akaike Information Criterion (AIC) of the models performed for the 76 species under study.** For zero-inflated GAMs are shown the deviance explained by the two components of the model. C = model with covariates dealing with environmental bias; ZIP = zero-inflated Poisson; ZINB = zero-inflated negative binomial; P = Poisson; NB = negative binomial; GAM = generalized additive model. For negative binomial models, values of the estimated dispersion parameter  $\theta$  (the smaller  $\theta$ , the larger overdispersion) are indicated in parentheses. High values of  $\theta$  indicates the absence of overdispersion.

| Species                                                          | Model                  | AIC      | Explained deviance (%) |       |
|------------------------------------------------------------------|------------------------|----------|------------------------|-------|
| Great Cormorant<br>( <i>Phalacrocorax carbo</i> )                | C-NB-GAM (0.284)       | 3029.39  |                        | 57.60 |
|                                                                  | C-ZINB-GAM (0.736)     | 3076.70  | Binomial               | 77.90 |
|                                                                  |                        |          | Count                  | 54.80 |
|                                                                  | C-ZIP-GAM              | 3231.56  | Binomial               | 61.80 |
|                                                                  |                        |          | Count                  | 59.70 |
| Black-crowned<br>Night Heron<br>( <i>Nycticorax nycticorax</i> ) | C-P-GAM                | 3395.69  |                        | 54.70 |
|                                                                  | C-NB-GAM (0.608)       | 6480.73  |                        | 54.80 |
|                                                                  | C-ZINB-GAM (1.179)     | 6537.11  | Binomial               | 89.00 |
|                                                                  |                        |          | Count                  | 42.40 |
|                                                                  | C-ZIP-GAM              | 6730.28  | Binomial               | 78.00 |
| Little Egret<br>( <i>Egretta garzetta</i> )                      |                        |          | Count                  | 45.40 |
|                                                                  | C-P-GAM                | 6921.94  |                        | 49.60 |
|                                                                  | C-NB-GAM (0.754)       | 9928.53  |                        | 57.60 |
|                                                                  | C-ZINB-GAM (1.092)     | 9939.50  | Binomial               | 92.40 |
|                                                                  |                        |          | Count                  | 42.20 |
| Grey Heron ( <i>Ardea cinerea</i> )                              | C-ZIP-GAM              | 10388.91 | Binomial               | 73.30 |
|                                                                  |                        |          | Count                  | 47.10 |
|                                                                  | C-P-GAM                | 10690.01 |                        | 52.30 |
|                                                                  | C-NB-GAM (1.668)       | 13735.41 |                        | 43.20 |
|                                                                  | C-ZINB-GAM (2.020)     | 13754.99 | Binomial               | 93.00 |
| Mallard ( <i>Anas platyrhynchos</i> )                            |                        |          | Count                  | 24.20 |
|                                                                  | C-ZIP-GAM              | 14081.95 | Binomial               | 84.30 |
|                                                                  |                        |          | Count                  | 25.30 |
|                                                                  | C-P-GAM                | 14134.81 |                        | 40.30 |
|                                                                  | C-ZINB-GAM (0.334)     | 11911.70 | Binomial               | 83.00 |
| Black Kite ( <i>Milvus migrans</i> )                             |                        |          | Count                  | 7.30  |
|                                                                  | C-NB-GAM (0.184)       | 11951.06 |                        | 45.00 |
|                                                                  | C-P-GAM                | 16149.18 |                        | 34.40 |
|                                                                  | C-ZIP-GAM              |          | Not converged          |       |
|                                                                  | C-ZINB-GAM (1.595)     | 3533.71  | Binomial               | 60.30 |
| Common Buzzard<br>( <i>Buteo buteo</i> )                         |                        |          | Count                  | 21.80 |
|                                                                  | C-ZIP-GAM              | 3554.90  | Binomial               | 49.60 |
|                                                                  |                        |          | Count                  | 27.30 |
|                                                                  | C-NB-GAM (0.236)       | 3563.95  |                        | 25.50 |
|                                                                  | C-P-GAM                | 3708.34  |                        | 22.40 |
|                                                                  | C-P-GAM                | 6141.11  |                        | 10.90 |
|                                                                  | C-ZIP-GAM              | 6155.44  | Binomial               | 50.70 |
|                                                                  |                        |          | Count                  | 9.10  |
|                                                                  | C-NB-GAM (1144.979)    | 6173.12  |                        | 9.98  |
|                                                                  | C-ZINB-GAM (92409.470) | 6173.28  | Binomial               | 54.80 |
|                                                                  |                        |          | Count                  | 7.74  |

|                                                            |                         |          |          |       |
|------------------------------------------------------------|-------------------------|----------|----------|-------|
| Common Kestrel<br>( <i>Falcon tinnunculus</i> )            | C-P-GAM                 | 6927.50  |          | 12.80 |
|                                                            | C-NB-GAM (299509.437)   | 6929.30  |          | 12.70 |
|                                                            | C-ZIP-GAM               | 7031.40  | Binomial | 46.20 |
|                                                            |                         |          | Count    | 10.90 |
|                                                            | C-ZINB-GAM (295104.699) | 7045.20  | Binomial | 48.80 |
|                                                            |                         |          | Count    | 10.40 |
| Common Quail<br>( <i>Coturnix coturnix</i> )               | C-ZIP-GAM               | 4384.35  | Binomial | 62.40 |
|                                                            |                         |          | Count    | 30.90 |
|                                                            | C-NB-GAM (0.805)        | 4406.25  |          | 30.70 |
|                                                            | C-ZINB-GAM (71374.331)  | 4407.33  | Binomial | 61.90 |
|                                                            |                         |          | Count    | 29.90 |
| Common Pheasant<br>( <i>Phasianus colchicus</i> )          | C-P-GAM                 | 4432.33  |          | 28.10 |
|                                                            | C-NB-GAM (1.884)        | 11672.84 |          | 38.90 |
|                                                            | C-ZIP-GAM               | 11699.55 | Binomial | 73.20 |
|                                                            |                         |          | Count    | 29.50 |
|                                                            | C-ZINB-GAM (9.601)      | 11719.96 | Binomial | 74.50 |
|                                                            |                         |          | Count    | 28.70 |
| Common Moorhen<br>( <i>Gallinula chloropus</i> )           | C-P-GAM                 | 11768.93 |          | 37.50 |
|                                                            | C-NB-GAM (3.303)        | 8059.16  |          | 42.00 |
|                                                            | C-P-GAM                 | 8069.28  |          | 40.90 |
|                                                            | C-ZIP-GAM               | 8082.19  | Binomial | 88.80 |
|                                                            |                         |          | Count    | 29.90 |
| Northern Lapwing<br>( <i>Vanellus vanellus</i> )           | C-ZINB-GAM (18.068)     | 8096.48  | Binomial | 89.30 |
|                                                            |                         |          | Count    | 29.70 |
|                                                            | C-NB-GAM (0.315)        | 3496.99  |          | 68.80 |
|                                                            | C-ZINB-GAM (0.675)      | 3514.25  | Binomial | 92.20 |
|                                                            |                         |          | Count    | 57.10 |
| Feral Pigeon<br>( <i>Columba livia domestica</i> )         | C-ZIP-GAM               | 3602.08  | Binomial | 81.80 |
|                                                            |                         |          | Count    | 63.30 |
|                                                            | C-P-GAM                 | 3968.96  |          | 61.00 |
|                                                            | C-ZINB-GAM (0.473)      | 26373.81 | Binomial | 89.30 |
|                                                            |                         |          | Count    | 24.50 |
| Common Wood Pigeon<br>( <i>Columba palumbus</i> )          | C-NB-GAM (0.380)        | 26547.21 |          | 47.00 |
|                                                            | C-ZIP-GAM               | 33086.27 | Binomial | 29.00 |
|                                                            |                         |          | Count    | 36.70 |
|                                                            | C-P-GAM                 | 39737.77 |          | 36.90 |
|                                                            | C-ZIP-GAM               | 16727.40 | Binomial | 73.30 |
| Eurasian Collared Dove<br>( <i>Streptopelia decaocto</i> ) |                         |          | Count    | 23.30 |
|                                                            | C-ZINB-GAM (15.744)     | 16751.67 | Binomial | 75.00 |
|                                                            |                         |          | Count    | 22.60 |
|                                                            | C-NB-GAM                | 16791.70 |          | 29.70 |
|                                                            | C-P-GAM                 | 16829.58 |          | 29.10 |
| European Turtle Dove<br>( <i>Streptopelia turtur</i> )     | C-ZINB-GAM (4.220)      | 23900.66 | Binomial | 85.50 |
|                                                            |                         |          | Count    | 37.80 |
|                                                            | C-NB-GAM (2.668)        | 24021.06 |          | 47.70 |
|                                                            | C-ZIP-GAM               | 24057.30 | Binomial | 74.60 |
|                                                            |                         |          | Count    | 38.50 |
|                                                            | C-P-GAM                 | 24405.06 |          | 46.00 |
|                                                            | C-ZIP-GAM               | 12102.23 | Binomial | 70.10 |
|                                                            |                         |          | Count    | 28.60 |
|                                                            | C-ZINB-GAM (9.848)      | 12110.22 | Binomial | 71.50 |
|                                                            |                         |          | Count    | 28.20 |
|                                                            | C-NB-GAM (1.318)        | 12185.88 |          | 33.60 |
|                                                            | C-P-GAM                 | 12326.01 |          | 31.70 |

|                                                                  |                         |          |          |       |
|------------------------------------------------------------------|-------------------------|----------|----------|-------|
| Common Cuckoo<br>( <i>Cuculus canorus</i> )                      | C-ZIP-GAM               | 25792.68 | Binomial | 80.70 |
|                                                                  |                         |          | Count    | 14.70 |
|                                                                  | C-ZINB-GAM (336562.339) | 25863.40 | Binomial | 80.10 |
|                                                                  |                         |          | Count    | 14.10 |
|                                                                  | C-P-GAM                 | 26140.75 |          | 19.00 |
| Common Swift<br>( <i>Apus apus</i> )                             | C-NB-GAM (3059509.190)  | 26180.97 |          | 18.70 |
|                                                                  | C-ZINB-GAM (0.295)      | 40080.10 | Binomial | 54.80 |
|                                                                  |                         |          | Count    | 9.61  |
|                                                                  | C-NB-GAM (0.178)        | 40556.48 |          | 14.40 |
|                                                                  | C-ZIP-GAM               | 55397.13 | Binomial | 7.87  |
| European Bee-eater<br>( <i>Merops apiaster</i> )                 |                         |          | Count    | 8.44  |
|                                                                  | C-P-GAM                 | 79149.04 |          | 14.80 |
|                                                                  | C-NB-GAM (0.073)        | 4230.85  |          | 48.40 |
|                                                                  | C-ZINB-GAM (0.376)      | 4286.48  | Binomial | 45.70 |
|                                                                  |                         |          | Count    | 42.30 |
| Eurasian Wryneck<br>( <i>Jynx torquilla</i> )                    | C-ZIP-GAM               | 4475.40  | Binomial | 14.30 |
|                                                                  |                         |          | Count    | 55.90 |
|                                                                  | C-P-GAM                 | 5468.65  |          | 37.30 |
|                                                                  | C-ZIP-GAM               | 3713.88  | Binomial | 63.40 |
|                                                                  |                         |          | Count    | 28.00 |
| European Green<br>Woodpecker ( <i>Picus<br/>viridis</i> )        | C-ZINB-GAM (66017.577)  | 3753.80  | Binomial | 64.10 |
|                                                                  |                         |          | Count    | 26.60 |
|                                                                  | C-P-GAM                 | 3754.60  |          | 26.10 |
|                                                                  | C-NB-GAM (0.346)        | 4277.52  |          | 26.30 |
|                                                                  | C-P-GAM                 | 7913.30  |          | 17.60 |
| Great Spotted<br>Woodpecker<br>( <i>Dendrocopos<br/>major</i> )  | C-ZIP-GAM               | 7931.24  | Binomial | 64.30 |
|                                                                  |                         |          | Count    | 15.90 |
|                                                                  | C-NB-GAM (15411.061)    | 7997.53  |          | 16.1  |
|                                                                  | C-ZINB-GAM (905764.043) | 8011.81  | Binomial | 63.80 |
|                                                                  |                         |          | Count    | 13.50 |
| Eurasian Skylark<br>( <i>Alauda arvensis</i> )                   | C-P-GAM                 | 11958.44 |          | 20.90 |
|                                                                  | C-NB-GAM (92666.166)    | 12021.31 |          | 20.20 |
|                                                                  | C-ZIP-GAM               | 12023.01 | Binomial | 79.10 |
|                                                                  |                         |          | Count    | 18.20 |
|                                                                  | C-ZINB-GAM (207106.000) | 12076.00 | Binomial | 79.60 |
| Eurasian Crag<br>Martin<br>( <i>Ptyonoprogne<br/>rupestris</i> ) |                         |          | Count    | 17.40 |
|                                                                  | C-ZIP-GAM               | 13476.92 | Binomial | 77.60 |
|                                                                  |                         |          | Count    | 45.00 |
|                                                                  | C-ZINB-GAM (14.493)     | 13504.58 | Binomial | 78.70 |
|                                                                  |                         |          | Count    | 44.50 |
| Barn Swallow<br>( <i>Hirundo rustica</i> )                       | C-NB-GAM (2.362)        | 13667.07 |          | 48.30 |
|                                                                  | C-P-GAM                 | 13742.54 |          | 47.00 |
|                                                                  | C-NB-GAM (0.159)        | 3798.65  |          | 47.10 |
|                                                                  | C-ZINB-GAM (1.021)      | 3833.38  | Binomial | 62.40 |
|                                                                  |                         |          | Count    | 43.60 |
|                                                                  | C-ZIP-GAM               | 3844.65  | Binomial | 40.00 |
|                                                                  |                         |          | Count    | 49.90 |
|                                                                  | C-P-GAM                 | 4178.56  |          | 39.60 |
|                                                                  | C-ZINB-GAM (0.802)      | 40303.37 | Binomial | 87.20 |
|                                                                  |                         |          | Count    | 25.20 |
|                                                                  | C-NB-GAM (0.708)        | 40464.14 |          | 41.00 |
|                                                                  | C-ZIP-GAM               | 47492.13 | Binomial | 31.40 |
|                                                                  |                         |          | Count    | 26.10 |
|                                                                  | C-P-GAM                 | 51918.72 |          | 35.00 |

|                                                          |                         |          |               |       |
|----------------------------------------------------------|-------------------------|----------|---------------|-------|
| Common House<br>Martin ( <i>Delichon<br/>urbicum</i> )   | C-ZINB-GAM (0.291)      | 23845.97 | Binomial      | 60.60 |
|                                                          |                         |          | Count         | 12.20 |
|                                                          | C-NB-GAM (0.154)        | 24040.40 |               | 18.30 |
|                                                          | C-ZIP-GAM               | 27742.22 | Binomial      | 8.39  |
|                                                          |                         |          | Count         | 16.70 |
| Tree Pipit ( <i>Anthus<br/>trivialis</i> )               | C-P-GAM                 | 36579.74 |               | 17.00 |
|                                                          | C-ZIP-GAM               | 5021.72  | Binomial      | 93.80 |
|                                                          |                         |          | Count         | 47.20 |
|                                                          | C-ZINB-GAM (259222.884) | 5050.91  | Binomial      | 93.60 |
|                                                          |                         |          | Count         | 46.50 |
| Water Pipit ( <i>Anthus<br/>spinoletta</i> )             | C-P-GAM                 | 5177.49  |               | 65.90 |
|                                                          | C-NB-GAM (4.512)        | 5224.74  |               | 66.50 |
|                                                          | C-ZINB-GAM (177199.646) | 3707.63  | Binomial      | 95.50 |
|                                                          |                         |          | Count         | 66.60 |
|                                                          | C-P-GAM                 | 3715.80  |               | 84.60 |
| Western Yellow<br>Wagtail ( <i>Motacilla<br/>flava</i> ) | C-NB-GAM (11.8)         | 3742.13  |               | 84.90 |
|                                                          | C-ZIP-GAM               |          | Not converged |       |
|                                                          | C-ZIP-GAM               | 11274.22 | Binomial      | 87.00 |
|                                                          |                         |          | Count         | 35.60 |
|                                                          | C-ZINB-GAM (8.354)      | 11290.24 | Binomial      | 89.40 |
| Grey Wagtail<br>( <i>Motacilla cinerea</i> )             |                         |          | Count         | 35.00 |
|                                                          | C-NB-GAM (2.546)        | 11421.31 |               | 54.40 |
|                                                          | C-P-GAM                 | 11501.58 |               | 52.10 |
|                                                          | C-P-GAM                 | 4879.06  |               | 30.40 |
|                                                          | C-ZIP-GAM               | 4896.97  | Binomial      | 87.20 |
| White Wagtail<br>( <i>Motacilla alba</i> )               |                         |          | Count         | 24.40 |
|                                                          | C-NB-GAM (32.599)       | 4935.47  |               | 29.00 |
|                                                          | C-ZINB-GAM (119200.423) | 4960.33  | Binomial      | 86.90 |
|                                                          |                         |          | Count         | 22.30 |
|                                                          | C-P-GAM                 | 11209.53 |               | 20.40 |
| Eurasian Wren<br>( <i>Troglodytes<br/>troglodytes</i> )  | C-NB-GAM (34911.335)    | 11225.74 |               | 20.20 |
|                                                          | C-ZIP-GAM               | 11234.61 | Binomial      | 75.80 |
|                                                          |                         |          | Count         | 19.90 |
|                                                          | C-ZINB-GAM (125329.338) | 11264.26 | Binomial      | 75.30 |
|                                                          |                         |          | Count         | 19.50 |
| Dunnock ( <i>Prunella<br/>modularis</i> )                | C-ZIP-GAM               | 17495.73 | Binomial      | 90.50 |
|                                                          |                         |          | Count         | 18.30 |
|                                                          | C-ZINB-GAM (96764.546)  | 17517.74 | Binomial      | 90.10 |
|                                                          |                         |          | Count         | 18.10 |
|                                                          | C-P-GAM                 | 17682.89 |               | 39.60 |
| European Robin<br>( <i>Erithacus<br/>rubecula</i> )      | C-NB-GAM (10.698)       | 17943.17 |               | 38.30 |
|                                                          | C-P-GAM                 | 4894.66  |               | 69.90 |
|                                                          | C-ZIP-GAM               | 4902.03  | Binomial      | 96.50 |
|                                                          |                         |          | Count         | 40.50 |
|                                                          | C-NB-GAM (90289.738)    | 4908.35  |               | 69.70 |
|                                                          | C-ZINB-GAM (290852.931) | 4923.56  | Binomial      | 96.30 |
|                                                          |                         |          | Count         | 40.00 |
|                                                          | C-ZIP-GAM               | 16251.34 | Binomial      | 93.40 |
|                                                          |                         |          | Count         | 33.30 |
|                                                          | C-ZINB-GAM (93303.352)  | 16273.17 | Binomial      | 93.30 |
|                                                          |                         |          | Count         | 33.30 |
|                                                          | C-P-GAM                 | 16634.23 |               | 52.80 |
|                                                          | C-NB-GAM (87.877)       | 16645.47 |               | 52.80 |



|                                                       |                          |          |          |       |
|-------------------------------------------------------|--------------------------|----------|----------|-------|
| Common Nighthale<br>( <i>Luscinia megarhynchos</i> )  | C-ZIP-GAM                | 25515.68 | Binomial | 89.60 |
|                                                       |                          |          | Count    | 33.50 |
|                                                       | C-ZINB-GAM (213716.954)  | 25573.05 | Binomial | 89.20 |
|                                                       |                          |          | Count    | 33.70 |
|                                                       | C-P-GAM                  | 26089.01 |          | 52.70 |
|                                                       | C-NB-GAM (690471.069)    | 26114.85 |          | 52.50 |
| Black Redstart<br>( <i>Phoenicurus ochruros</i> )     | C-ZIP-GAM                | 7593.68  | Binomial | 88.70 |
|                                                       |                          |          | Count    | 41.10 |
|                                                       | C-ZINB-GAM (387811.573)  | 7603.81  | Binomial | 89.00 |
|                                                       |                          |          | Count    | 40.80 |
|                                                       | C-P-GAM                  | 7635.01  |          | 56.00 |
|                                                       | C-NB-GAM (141339.368)    | 7636.27  |          | 56.00 |
| Common Redstart<br>( <i>Phoenicurus Phoenicurus</i> ) | C-ZIP-GAM                | 11928.43 | Binomial | 88.20 |
|                                                       |                          |          | Count    | 23.10 |
|                                                       | C-ZINB-GAM (385821.722)  | 11948.16 | Binomial | 88.10 |
|                                                       |                          |          | Count    | 22.90 |
|                                                       | C-P-GAM                  | 12013.63 |          | 34.20 |
|                                                       | C-NB-GAM (229589.045)    | 12021.75 |          | 34.10 |
| African Stonechat<br>( <i>Saxicola torquatus</i> )    | C-ZIP-GAM                | 5151.91  | Binomial | 54.40 |
|                                                       |                          |          | Count    | 33.40 |
|                                                       | C-ZINB-GAM (32713.385)   | 5180.57  | Binomial | 53.50 |
|                                                       |                          |          | Count    | 32.40 |
|                                                       | C-NB-GAM (0.629)         | 5181.02  |          | 29.10 |
|                                                       | C-P-GAM                  | 5224.84  |          | 26.50 |
| Northern Wheatear<br>( <i>Oenanthe oenanthe</i> )     | C-P-GAM                  | 2515.16  |          | 77.80 |
|                                                       | C-ZIP-GAM                | 2519.88  | Binomial | 97.90 |
|                                                       |                          |          | Count    | 55.00 |
|                                                       | C-NB-GAM (41460.755)     | 2526.04  |          | 77.30 |
|                                                       | C-ZINB-GAM (762946.519)  | 2536.48  | Binomial | 97.90 |
|                                                       |                          |          | Count    | 54.30 |
| Common Blackbird<br>( <i>Turdus merula</i> )          | C-ZIP-GAM                | 45864.32 | Binomial | 81.20 |
|                                                       |                          |          | Count    | 22.20 |
|                                                       | C-ZINB-GAM (1720556.717) | 45714.74 | Binomial | 81.00 |
|                                                       |                          |          | Count    | 22.00 |
|                                                       | C-P-GAM                  | 45832.06 |          | 28.00 |
|                                                       | C-NB-GAM (2692926.525)   | 45851.83 |          | 27.80 |
| Song Thrush<br>( <i>Turdus philomelos</i> )           | C-ZIP-GAM                | 6540.94  | Binomial | 92.90 |
|                                                       |                          |          | Count    | 23.60 |
|                                                       | C-ZINB-GAM (129475.547)  | 6648.63  | Binomial | 91.90 |
|                                                       |                          |          | Count    | 20.00 |
|                                                       | C-P-GAM                  | 6674.23  |          | 44.40 |
|                                                       | C-NB-GAM (3.090)         | 6806.35  |          | 43.70 |
| Mistle Thrush<br>( <i>Turdus viscivorus</i> )         | C-ZIP-GAM                | 2902.87  | Binomial | 88.20 |
|                                                       |                          |          | Count    | 24.30 |
|                                                       | C-ZINB-GAM (1001115.204) | 2925.33  | Binomial | 89.50 |
|                                                       |                          |          | Count    | 19.10 |
|                                                       | C-P-GAM                  | 2932.33  |          | 46.30 |
|                                                       | C-NB-GAM (1.580)         | 2934.39  |          | 48.10 |

|                                                              |                          |          |               |       |
|--------------------------------------------------------------|--------------------------|----------|---------------|-------|
| Cetti's Warbler<br>( <i>Cettia cetti</i> )                   | C-ZIP-GAM                | 6450.23  | Binomial      | 84.50 |
|                                                              |                          |          | Count         | 37.30 |
|                                                              | C-ZINB-GAM (8.695)       | 6468.52  | Binomial      | 84.60 |
|                                                              |                          |          | Count         | 37.00 |
|                                                              | C-NB-GAM (0.996)         | 6486.37  |               | 46.30 |
| Melodius Warbler<br>( <i>Hippolais polyglotta</i> )          | C-P-GAM                  | 6565.63  |               | 43.30 |
|                                                              | C-ZIP-GAM                | 4529.84  | Binomial      | 65.30 |
|                                                              |                          |          | Count         | 31.10 |
|                                                              | C-NB-GAM (0.435)         | 4534.72  |               | 31.40 |
|                                                              | C-ZINB-GAM (17.146)      | 4555.42  | Binomial      | 64.90 |
| Lesser Whitethroat<br>( <i>Curruca curruca</i> )             |                          |          | Count         | 29.30 |
|                                                              | C-P-GAM                  | 4585.81  |               | 28.70 |
|                                                              | C-ZIP-GAM                | 3000.43  | Binomial      | 91.80 |
|                                                              |                          |          | Count         | 31.80 |
|                                                              | C-ZINB-GAM (66638.615)   | 3014.07  | Binomial      | 91.10 |
| Eurasian Blackcap<br>( <i>Sylvia atricapilla</i> )           |                          |          | Count         | 32.20 |
|                                                              | C-P-GAM                  | 3020.25  |               | 61.30 |
|                                                              | C-NB-GAM (1.63)          | 3042.61  |               | 63.10 |
|                                                              | C-ZIP-GAM                | 48060.23 | Binomial      | 88.60 |
|                                                              |                          |          | Count         | 21.50 |
| Western Bonelli's Warbler<br>( <i>Phylloscopus bonelli</i> ) | C-ZINB-GAM (595897.002)  | 48132.52 | Binomial      | 87.20 |
|                                                              |                          |          | Count         | 20.80 |
|                                                              | C-P-GAM                  | 48209.62 |               | 29.30 |
|                                                              | C-NB-GAM (566535.073)    | 48282.73 |               | 28.80 |
|                                                              | C-ZINB-GAM (3.52)        | 6627.47  | Binomial      | 71.00 |
| Common Chiffchaff<br>( <i>Phylloscopus collybita</i> )       |                          |          | Count         | 41.40 |
|                                                              | C-NB-GAM (0.405)         | 6726.72  |               | 57.80 |
|                                                              | C-P-GAM                  | 7211.36  |               | 51.50 |
|                                                              | C-ZIP-GAM                |          | Not converged |       |
|                                                              | C-ZIP-GAM                | 13150.88 | Binomial      | 91.90 |
| Goldcrest ( <i>Regulus regulus</i> )                         |                          |          | Count         | 27.70 |
|                                                              | C-ZINB-GAM (58861.5429)  | 13172.84 | Binomial      | 91.50 |
|                                                              |                          |          | Count         | 28.30 |
|                                                              | C-P-GAM                  | 13329.43 |               | 50.40 |
|                                                              | C-NB-GAM (17966.806)     | 13330.12 |               | 50.40 |
| Common Firecrest<br>( <i>Regulus ignicapilla</i> )           | C-ZIP-GAM                | 5562.70  | Binomial      | 91.80 |
|                                                              |                          |          | Count         | 47.30 |
|                                                              | C-P-GAM                  | 5640.06  |               | 59.70 |
|                                                              | C-ZINB-GAM (25.475)      | 5643.97  | Binomial      | 91.30 |
|                                                              |                          |          | Count         | 45.40 |
| Spotted Flycatcher<br>( <i>Muscicapa striata</i> )           | C-NB-GAM (2.305)         | 5674.59  |               | 60.90 |
|                                                              | C-ZIP-GAM                | 4838.47  | Binomial      | 72.80 |
|                                                              |                          |          | Count         | 40.30 |
|                                                              | C-ZINB-GAM (21117.411)   | 4900.82  | Binomial      | 67.80 |
|                                                              |                          |          | Count         | 40.30 |
|                                                              | C-NB-GAM (0.671)         | 4902.20  |               | 45.40 |
|                                                              | C-P-GAM                  | 4916.71  |               | 42.10 |
|                                                              | C-P-GAM                  | 13412.03 |               | 21.40 |
|                                                              | C-ZIP-GAM                | 13427.06 | Binomial      | 79.10 |
|                                                              |                          |          | Count         | 15.80 |
|                                                              | C-NB-GAM                 | 13429.56 |               | 21.10 |
|                                                              | C-ZINB-GAM (1537699.063) | 13502.62 | Binomial      | 81.80 |
|                                                              |                          |          | Count         | 14.20 |

|                                                       |                         |          |          |       |
|-------------------------------------------------------|-------------------------|----------|----------|-------|
| Long-tailed Tit<br>( <i>Aegithalos caudatus</i> )     | C-P-GAM                 | 8768.01  |          | 17.80 |
|                                                       | C-NB-GAM (2531114.871)  | 8771.23  |          | 17.80 |
|                                                       | C-ZIP-GAM               | 8855.56  | Binomial | 71.00 |
|                                                       |                         |          | Count    | 12.60 |
|                                                       | C-ZINB-GAM (88403.418)  | 8861.84  | Binomial | 71.30 |
|                                                       |                         |          | Count    | 12.40 |
| Marsh Tit ( <i>Poecile palustris</i> )                | C-ZIP-GAM               | 6839.02  | Binomial | 86.00 |
|                                                       |                         |          | Count    | 31.90 |
|                                                       | C-ZINB-GAM (30.045)     | 6877.20  | Binomial | 86.00 |
|                                                       |                         |          | Count    | 30.70 |
|                                                       | C-NB-GAM (1.056)        | 7001.02  |          | 45.80 |
|                                                       | C-P-GAM                 | 7057.28  |          | 42.80 |
| Willow Tit ( <i>Poecile montanus</i> )                | C-ZIP-GAM               | 2750.03  | Binomial | 89.80 |
|                                                       |                         |          | Count    | 32.40 |
|                                                       | C-ZINB-GAM (255855.435) | 2760.22  | Binomial | 90.00 |
|                                                       |                         |          | Count    | 30.70 |
|                                                       | C-NB-GAM (1.532)        | 2810.90  |          | 58.80 |
|                                                       | C-P-GAM                 | 2827.38  |          | 55.90 |
| European Crested Tit ( <i>Lophophanes cristatus</i> ) | C-ZIP-GAM               | 4225.32  | Binomial | 86.30 |
|                                                       |                         |          | Count    | 46.30 |
|                                                       | C-ZINB-GAM (28.989)     | 4240.97  | Binomial | 86.30 |
|                                                       |                         |          | Count    | 46.00 |
|                                                       | C-NB-GAM                | 4298.49  |          | 58.00 |
|                                                       | C-P-GAM                 | 4372.76  |          | 54.00 |
| Coal Tit ( <i>Periparus ater</i> )                    | C-ZIP-GAM               | 13899.30 | Binomial | 89.50 |
|                                                       |                         |          | Count    | 42.20 |
|                                                       | C-ZINB-GAM (26.712)     | 13939.49 | Binomial | 90.30 |
|                                                       |                         |          | Count    | 41.80 |
|                                                       | C-NB-GAM (5.177)        | 14211.60 |          | 67.50 |
|                                                       | C-P-GAM                 | 14249.30 |          | 66.40 |
| Eurasian Blue Tit ( <i>Cyanistes caeruleus</i> )      | C-ZIP-GAM               | 13764.00 | Binomial | 79.50 |
|                                                       |                         |          | Count    | 19.70 |
|                                                       | C-ZINB-GAM (166.830)    | 13844.32 | Binomial | 78.30 |
|                                                       |                         |          | Count    | 18.70 |
|                                                       | C-P-GAM                 | 13997.30 |          | 32.90 |
|                                                       | C-NB-GAM ((2.661)       | 14038.47 |          | 33.20 |
| Great Tit ( <i>Parus major</i> )                      | C-ZIP-GAM               | 32209.26 | Binomial | 81.10 |
|                                                       |                         |          | Count    | 13.50 |
|                                                       | C-ZINB-GAM (122665.837) | 32248.47 | Binomial | 80.50 |
|                                                       |                         |          | Count    | 13.30 |
|                                                       | C-P-GAM                 | 32296.40 |          | 21.80 |
|                                                       | C-NB-GAM (56747.195)    | 32317.42 |          | 21.60 |
| Eurasian Nuthatch ( <i>Sitta europaea</i> )           | C-ZIP-GAM               | 4736.48  | Binomial | 85.30 |
|                                                       |                         |          | Count    | 32.00 |
|                                                       | C-ZINB-GAM (2673.914)   | 4833.81  | Binomial | 84.30 |
|                                                       |                         |          | Count    | 28.60 |
|                                                       | C-P-GAM                 | 4887.27  |          | 38.50 |
|                                                       | C-NB-GAM (0.821)        | 4914.27  |          | 40.40 |

|                                                                   |                        |          |          |       |
|-------------------------------------------------------------------|------------------------|----------|----------|-------|
| Short-toed<br>Treecreeper<br>( <i>Certhia<br/>brachydactyla</i> ) | C-ZIP-GAM              | 2952.57  | Binomial | 91.30 |
|                                                                   |                        |          | Count    | 36.70 |
|                                                                   | C-P-GAM                | 2956.61  |          | 45.60 |
|                                                                   | C-NB-GAM (4.807)       | 2965.82  |          | 46.00 |
|                                                                   | C-ZINB-GAM (67079.969) | 2973.61  | Binomial | 91.00 |
| Eurasian Golden<br>Oriole ( <i>Oriolus<br/>oriolus</i> )          |                        |          | Count    | 35.70 |
|                                                                   | C-ZIP-GAM              | 9430.02  | Binomial | 85.30 |
|                                                                   |                        |          | Count    | 30.50 |
|                                                                   | C-ZINB-GAM (94932.338) | 9466.67  | Binomial | 83.50 |
|                                                                   |                        |          | Count    | 31.40 |
| Red-backed Shrike<br>( <i>Lanius collurio</i> )                   | C-P-GAM                | 9514.51  |          | 40.40 |
|                                                                   | C-NB-GAM               | 9533.47  |          | 41.10 |
|                                                                   | C-P-GAM                | 6147.40  |          | 23.20 |
|                                                                   | C-NB-GAM (7.766)       | 6153.75  |          | 23.20 |
|                                                                   | C-ZIP-GAM              | 6172.55  | Binomial | 69.70 |
| Eurasian Jay<br>( <i>Garrulus<br/>glandarius</i> )                |                        |          | Count    | 25.40 |
|                                                                   | C-ZINB-GAM (131338.51) | 6189.26  | Binomial | 70.30 |
|                                                                   |                        |          | Count    | 25.10 |
|                                                                   | C-P-GAM                | 9552.70  |          | 29.40 |
|                                                                   | C-NB-GAM (453507.129)  | 9578.89  |          | 28.90 |
| Eurasian Magpie<br>( <i>Pica pica</i> )                           | C-ZIP-GAM              | 9589.78  | Binomial | 85.80 |
|                                                                   |                        |          | Count    | 20.40 |
|                                                                   | C-ZINB-GAM (132878.23) | 9836.27  | Binomial | 84.30 |
|                                                                   |                        |          | Count    | 16.00 |
|                                                                   | C-ZIP-GAM              | 12836.52 | Binomial | 89.50 |
| Carrion Crow<br>( <i>Corvus corone</i> )                          |                        |          | Count    | 27.70 |
|                                                                   | C-ZINB-GAM (16.487)    | 12858.11 | Binomial | 89.80 |
|                                                                   |                        |          | Count    | 27.40 |
|                                                                   | C-NB-GAM (4.266)       | 12882.85 |          | 39.50 |
|                                                                   | C-P-GAM                | 12897.32 |          | 28.70 |
| Hooded Crow<br>( <i>Corvus cornix</i> )                           | C-ZIP-GAM              | 3261.47  | Binomial | 86.70 |
|                                                                   |                        |          | Count    | 45.70 |
|                                                                   | C-ZINB-GAM (2.416)     | 3264.04  | Binomial | 89.60 |
|                                                                   |                        |          | Count    | 41.50 |
|                                                                   | C-NB-GAM (0.732)       | 3348.44  |          | 55.00 |
| Common Starling<br>( <i>Sturnus vulgaris</i> )                    | C-P-GAM                | 3391.32  |          | 53.00 |
|                                                                   | C-ZINB-GAM (2.221)     | 47078.79 | Binomial | 91.40 |
|                                                                   |                        |          | Count    | 32.30 |
|                                                                   | C-NB-GAM (2.184)       | 47142.09 |          | 39.20 |
|                                                                   | C-ZIP-GAM              | 51689.46 | Binomial | 75.30 |
|                                                                   |                        |          | Count    | 29.90 |
|                                                                   | C-P-GAM                | 51896.28 |          | 36.60 |
|                                                                   | C-ZINB-GAM (3.064)     | 32012.92 | Binomial | 97.10 |
|                                                                   |                        |          | Count    | 32.40 |
|                                                                   | C-NB-GAM (3.011)       | 32013.45 |          | 48.00 |
|                                                                   | C-ZIP-GAM              | 33407.99 | Binomial | 94.80 |
|                                                                   |                        |          | Count    | 29.90 |
|                                                                   | C-P-GAM                | 33442.58 |          | 43.70 |

|                                                      |                          |          |          |       |
|------------------------------------------------------|--------------------------|----------|----------|-------|
| Italian Sparrow<br>( <i>Passer italiae</i> )         | C-ZIP-GAM                | 30881.22 | Binomial | 97.20 |
|                                                      |                          |          | Count    | 39.00 |
|                                                      | C-ZINB-GAM (21.534)      | 30913.60 | Binomial | 96.90 |
|                                                      |                          |          | Count    | 39.80 |
|                                                      | C-P-GAM                  | 30937.87 |          | 48.90 |
| Eurasian Tree Sparrow ( <i>Passer montanus</i> )     | C-NB-GAM (19.285)        | 30944.07 |          | 49.20 |
|                                                      | C-ZIP-GAM                | 17891.27 | Binomial | 94.90 |
|                                                      |                          |          | Count    | 21.90 |
|                                                      | C-P-GAM                  | 17912.57 |          | 33.90 |
|                                                      | C-ZINB-GAM (658979.465)  | 17934.73 | Binomial | 94.50 |
| Common Chaffinch<br>( <i>Fringilla coelebs</i> )     |                          |          | Count    | 21.40 |
|                                                      | C-NB-GAM (353604.226)    | 17953.29 |          | 33.50 |
|                                                      | C-ZIP-GAM                | 41633.72 | Binomial | 79.60 |
|                                                      |                          |          | Count    | 24.20 |
|                                                      | C-ZINB-GAM (3555510.598) | 41665.93 | Binomial | 79.80 |
| European Serin<br>( <i>Serinus serinus</i> )         |                          |          | Count    | 24.00 |
|                                                      | C-P-GAM                  | 43408.7  |          | 41.10 |
|                                                      | C-NB-GAM (785815.051)    | 43430.87 |          | 40.90 |
|                                                      | C-ZIP-GAM                | 15368.22 | Binomial | 87.80 |
|                                                      |                          |          | Count    | 26.30 |
| European Greenfinch<br>( <i>Chloris chloris</i> )    | C-ZINB-GAM (63.969)      | 15437.27 | Binomial | 87.50 |
|                                                      |                          |          | Count    | 25.90 |
|                                                      | C-NB-GAM                 | 15962.71 |          | 35.20 |
|                                                      | C-P-GAM                  | 16008.36 |          | 34.40 |
|                                                      | C-ZINB-GAM (2.639)       | 16415.30 | Binomial | 68.10 |
| European Goldfinch<br>( <i>Carduelis carduelis</i> ) |                          |          | Count    | 23.10 |
|                                                      | C-NB-GAM (0.902)         | 16485.18 |          | 30.10 |
|                                                      | C-ZIP-GAM                | 16532.33 | Binomial | 57.40 |
|                                                      |                          |          | Count    | 25.00 |
|                                                      | C-P-GAM                  | 17042.48 |          | 27.50 |
| Common Linnet<br>( <i>Linaria cannabina</i> )        | C-ZINB-GAM (1.7749)      | 19064.10 | Binomial | 52.90 |
|                                                      |                          |          | Count    | 19.00 |
|                                                      | C-NB-GAM (0.623)         | 19084.07 |          | 21.50 |
|                                                      | C-ZIP-GAM                | 19157.66 | Binomial | 34.40 |
|                                                      |                          |          | Count    | 23.40 |
| Common Redpoll<br>( <i>Acanthis flammea</i> )        | C-P-GAM                  | 19939.7  |          | 20.10 |
|                                                      | C-ZINB-GAM (1.336)       | 3209.39  | Binomial | 92.10 |
|                                                      |                          |          | Count    | 39.90 |
|                                                      | C-ZIP-GAM                | 3253.82  | Binomial | 82.90 |
|                                                      |                          |          | Count    | 45.90 |
|                                                      | C-NB-GAM (0.473)         | 3275.33  |          | 65.90 |
|                                                      | C-P-GAM                  | 3458.20  |          | 59.20 |
|                                                      | C-ZINB-GAM (1.190)       | 3421.109 | Binomial | 94.20 |
|                                                      |                          |          | Count    | 29.10 |
|                                                      | C-ZIP-GAM                | 3466.635 | Binomial | 81.70 |
|                                                      |                          |          | Count    | 41.00 |
|                                                      | C-NB-GAM (0.592)         | 3515.496 |          | 69.00 |
|                                                      | C-P-GAM                  | 3699.918 |          | 62.20 |

|                                                    |                        |         |          |       |
|----------------------------------------------------|------------------------|---------|----------|-------|
| Eurasian Bullfinch<br>( <i>Pyrrhula pyrrhula</i> ) | C-ZIP-GAM              | 3601.80 | Binomial | 89.30 |
|                                                    |                        |         | Count    | 29.30 |
|                                                    | C-P-GAM                | 3617.81 |          | 49.20 |
|                                                    | C-NB-GAM (2.084)       | 3627.82 |          | 50.60 |
|                                                    | C-ZINB-GAM (87108.682) | 3631.22 | Binomial | 87.60 |
|                                                    |                        |         | Count    | 28.70 |

**Table S5. Summary of models performed for each species.** In each table, the common and the scientific name of the species, the type of model and summary statistics for both parametric and smooth terms are shown. Land cover covariates (see also [54] for further details): C110 = continue urban matrix and infrastructures; C112 = discontinue urban matrix; C211 = arable lands; C213 = paddy fields; C221 = vineyards; C222 = orchards; C223 = olive groves; C224 = wood plantations; C231 = meadows and pastures; C311 = broadleaved forests; C312 = coniferous forests; C313 = mixed forests; C320 = shrub lands; C321 = grasslands; C330 = areas with sparse or absent vegetation; C410 = wetland vegetation; C511 = rivers and streams. Edf = estimated degree of freedom.

| <b>Great Cormorant (<i>Phalacrocorax carbo</i>) — Model C-NB-GAM</b> |                 |                       |                |                |
|----------------------------------------------------------------------|-----------------|-----------------------|----------------|----------------|
| <b>Parametric terms</b>                                              | <b>Estimate</b> | <b>Standard error</b> | <b>z-value</b> | <b>p-value</b> |
| Intercept                                                            | -7.963          | 1.052                 | -7.568         | < 0.001        |
| Year 2005                                                            | 0.459           | 0.390                 | 1.178          | 0.239          |
| Year 2006                                                            | -0.583          | 0.620                 | -0.941         | 0.347          |
| Year 2007                                                            | 0.709           | 0.441                 | 1.607          | 0.108          |
| Year 2008                                                            | 0.954           | 0.403                 | 2.369          | 0.018          |
| Year 2009                                                            | 1.698           | 0.365                 | 4.655          | < 0.001        |
| Year 2010                                                            | 1.540           | 0.387                 | 3.978          | < 0.001        |
| Year 2011                                                            | 1.899           | 0.371                 | 5.120          | < 0.001        |
| Year 2012                                                            | 1.453           | 0.383                 | 3.797          | < 0.001        |
| Year 2013                                                            | 1.709           | 0.374                 | 4.575          | < 0.001        |
| Year 2014                                                            | 2.574           | 0.349                 | 7.374          | < 0.001        |
| Year 2015                                                            | 2.743           | 0.348                 | 7.888          | < 0.001        |
| Year 2016                                                            | 2.240           | 0.382                 | 5.872          | < 0.001        |
| Year 2017                                                            | 2.208           | 0.378                 | 5.839          | < 0.001        |
| Year 2018                                                            | 2.382           | 0.374                 | 6.370          | < 0.001        |
| Year 2019                                                            | -0.126          | 0.092                 | -1.364         | 0.172          |
| Sin                                                                  | 0.232           | 0.140                 | 1.661          | 0.097          |
| Cos                                                                  | -7.963          | 1.052                 | -7.568         | < 0.001        |
| <b>Smooth terms</b>                                                  | <b>edf</b>      | <b>Chi square</b>     | <b>p-value</b> |                |
| s(X,Y)                                                               | 2.015           | 242.782               | < 0.001        |                |
| s(Elevation)                                                         | 2.488           | 168.363               | < 0.001        |                |
| s(Slope)                                                             | 0.756           | 2.814                 | 0.051          |                |
| s(C110)                                                              | 2.062           | 76.111                | < 0.001        |                |
| s(C112)                                                              | 1.024           | 28.223                | < 0.001        |                |
| s(C211)                                                              | 1.502           | 65.433                | < 0.001        |                |
| s(C213)                                                              | 1.020           | 30.178                | < 0.001        |                |
| s(C221)                                                              | 0.606           | 1.369                 | 0.129          |                |
| s(C222)                                                              | 0.000           | 0.000                 | 0.645          |                |
| s(C223)                                                              | 0.000           | 0.000                 | 0.369          |                |
| s(C224)                                                              | 0.924           | 11.020                | < 0.001        |                |
| s(C231)                                                              | 1.095           | 33.632                | < 0.001        |                |
| s(C311)                                                              | 2.332           | 34.278                | < 0.001        |                |
| s(C312)                                                              | 0.693           | 1.728                 | 0.114          |                |
| s(C313)                                                              | 0.910           | 8.012                 | 0.002          |                |
| s(C320)                                                              | 0.000           | 0.000                 | 0.747          |                |
| s(C321)                                                              | 0.358           | 0.451                 | 0.259          |                |
| s(C330)                                                              | 0.000           | 0.000                 | 0.396          |                |
| s(C410)                                                              | 0.987           | 43.675                | < 0.001        |                |
| s(C511)                                                              | 0.622           | 1.477                 | 0.118          |                |

| <b>Black-crowned Night Heron (<i>Nycticorax nycticorax</i>) — Model C-NB-GAM</b> |                 |                       |                |                |
|----------------------------------------------------------------------------------|-----------------|-----------------------|----------------|----------------|
| <b>Parametric terms</b>                                                          | <b>Estimate</b> | <b>Standard error</b> | <b>z-value</b> | <b>p-value</b> |
| Intercept                                                                        | −7.401          | 1.021                 | −7.247         | < 0.001        |
| Year 1995                                                                        | −2.113          | 0.289                 | −7.302         | < 0.001        |
| Year 1996                                                                        | −1.349          | 0.226                 | −5.956         | < 0.001        |
| Year 1999                                                                        | −1.293          | 0.223                 | −5.810         | < 0.001        |
| Year 2000                                                                        | −0.766          | 0.195                 | −3.923         | < 0.001        |
| Year 2001                                                                        | −1.083          | 0.201                 | −5.375         | < 0.001        |
| Year 2002                                                                        | −1.883          | 0.272                 | −6.922         | < 0.001        |
| Year 2003                                                                        | −2.128          | 0.320                 | −6.640         | < 0.001        |
| Year 2004                                                                        | −1.573          | 0.331                 | −4.745         | < 0.001        |
| Year 2005                                                                        | −1.655          | 0.216                 | −7.646         | < 0.001        |
| Year 2006                                                                        | −1.557          | 0.228                 | −6.814         | < 0.001        |
| Year 2007                                                                        | −1.486          | 0.240                 | −6.187         | < 0.001        |
| Year 2008                                                                        | −1.230          | 0.230                 | −5.353         | < 0.001        |
| Year 2009                                                                        | −1.734          | 0.237                 | −7.304         | < 0.001        |
| Year 2010                                                                        | −0.921          | 0.210                 | −4.376         | < 0.001        |
| Year 2011                                                                        | −1.282          | 0.225                 | −5.700         | < 0.001        |
| Year 2012                                                                        | −2.048          | 0.272                 | −7.539         | < 0.001        |
| Year 2013                                                                        | −1.329          | 0.232                 | −5.729         | < 0.001        |
| Year 2014                                                                        | −1.261          | 0.232                 | −5.440         | < 0.001        |
| Year 2015                                                                        | −1.250          | 0.226                 | −5.540         | < 0.001        |
| Year 2016                                                                        | −1.703          | 0.249                 | −6.836         | < 0.001        |
| Year 2017                                                                        | −1.621          | 0.305                 | −5.323         | < 0.001        |
| Year 2018                                                                        | −1.914          | 0.296                 | −6.457         | < 0.001        |
| Year 2019                                                                        | −2.487          | 0.378                 | −6.573         | < 0.001        |
| Sin                                                                              | 0.091           | 0.056                 | 1.610          | 0.107          |
| Cos                                                                              | −0.076          | 0.086                 | −0.880         | 0.379          |
| <b>Smooth terms</b>                                                              | <b>edf</b>      | <b>Chi square</b>     | <b>p-value</b> |                |
| s(X,Y)                                                                           | 1.954           | 114.550               | < 0.001        |                |
| s(Elevation)                                                                     | 1.017           | 58.680                | < 0.001        |                |
| s(Slope)                                                                         | 0.284           | 0.355                 | 0.257          |                |
| s(C110)                                                                          | 1.016           | 19.906                | < 0.001        |                |
| s(C112)                                                                          | 0.122           | 0.143                 | 0.275          |                |
| s(C211)                                                                          | 0.992           | 7.735                 | 0.003          |                |
| s(C213)                                                                          | 2.681           | 216.444               | < 0.001        |                |
| s(C221)                                                                          | 0.798           | 3.332                 | 0.040          |                |
| s(C222)                                                                          | 0.865           | 5.404                 | 0.012          |                |
| s(C223)                                                                          | 0.688           | 0.418                 | 0.436          |                |
| s(C224)                                                                          | 0.011           | 0.009                 | 0.351          |                |
| s(C231)                                                                          | 0.914           | 7.470                 | 0.003          |                |
| s(C311)                                                                          | 0.001           | 0.001                 | 0.166          |                |
| s(C312)                                                                          | 0.000           | 0.000                 | 0.696          |                |
| s(C313)                                                                          | 0.000           | 0.000                 | 0.577          |                |
| s(C320)                                                                          | 0.002           | 0.001                 | 0.392          |                |
| s(C321)                                                                          | 0.631           | 1.035                 | 0.200          |                |
| s(C330)                                                                          | 0.501           | 0.865                 | 0.187          |                |
| s(C410)                                                                          | 1.007           | 132.680               | < 0.001        |                |
| s(C511)                                                                          | 0.000           | 0.000                 | 0.423          |                |



| Little Egret ( <i>Egretta garzetta</i> ) — Model C-NB-GAM |          |                |            |         |
|-----------------------------------------------------------|----------|----------------|------------|---------|
| Parametric terms                                          | Estimate | Standard error | z-value    | p-value |
| Intercept                                                 | −11.318  | 1.510          | −7.497     | < 0.001 |
| Year 1995                                                 | −0.667   | 0.272          | −2.452     | 0.014   |
| Year 1996                                                 | −0.386   | 0.253          | −1.526     | 0.127   |
| Year 1999                                                 | 0.282    | 0.234          | 1.204      | 0.229   |
| Year 2000                                                 | 0.722    | 0.220          | 3.276      | 0.001   |
| Year 2001                                                 | 0.211    | 0.225          | 0.938      | 0.348   |
| Year 2002                                                 | 0.399    | 0.244          | 1.635      | 0.102   |
| Year 2003                                                 | −0.416   | 0.278          | −1.497     | 0.134   |
| Year 2004                                                 | −0.391   | 0.325          | −1.201     | 0.230   |
| Year 2005                                                 | 0.087    | 0.228          | 0.381      | 0.703   |
| Year 2006                                                 | 0.245    | 0.231          | 1.061      | 0.289   |
| Year 2007                                                 | 0.064    | 0.247          | 0.259      | 0.795   |
| Year 2008                                                 | 0.228    | 0.243          | 0.939      | 0.348   |
| Year 2009                                                 | 0.302    | 0.233          | 1.296      | 0.195   |
| Year 2010                                                 | 0.574    | 0.230          | 2.490      | 0.013   |
| Year 2011                                                 | 0.479    | 0.234          | 2.046      | 0.041   |
| Year 2012                                                 | −0.126   | 0.252          | −0.498     | 0.618   |
| Year 2013                                                 | 0.758    | 0.231          | 3.282      | 0.001   |
| Year 2014                                                 | 0.671    | 0.235          | 2.857      | 0.004   |
| Year 2015                                                 | 0.595    | 0.234          | 2.546      | 0.011   |
| Year 2016                                                 | 0.735    | 0.232          | 3.173      | 0.002   |
| Year 2017                                                 | 0.598    | 0.258          | 2.319      | 0.020   |
| Year 2018                                                 | 0.326    | 0.258          | 1.264      | 0.206   |
| Year 2019                                                 | 0.375    | 0.260          | 1.442      | 0.149   |
| Sin                                                       | 0.013    | 0.043          | 0.296      | 0.767   |
| Cos                                                       | −0.055   | 0.067          | −0.828     | 0.408   |
| Smooth terms                                              |          | edf            | Chi square | p-value |
| s(X,Y)                                                    |          | 1.857          | 98.662     | < 0.001 |
| s(Elevation)                                              |          | 1.005          | 102.320    | < 0.001 |
| s(Slope)                                                  |          | 0.942          | 10.682     | < 0.001 |
| s(C110)                                                   |          | 1.171          | 71.180     | < 0.001 |
| s(C112)                                                   |          | 0.985          | 20.906     | 0.000   |
| s(C211)                                                   |          | 0.001          | 0.000      | 0.795   |
| s(C213)                                                   |          | 2.815          | 521.595    | < 0.001 |
| s(C221)                                                   |          | 0.768          | 2.776      | 0.057   |
| s(C222)                                                   |          | 0.783          | 3.110      | 0.046   |
| s(C223)                                                   |          | 0.000          | 0.000      | 0.579   |
| s(C224)                                                   |          | 0.001          | 0.000      | 0.593   |
| s(C231)                                                   |          | 0.943          | 9.713      | 0.001   |
| s(C311)                                                   |          | 0.000          | 0.000      | 0.893   |
| s(C312)                                                   |          | 0.001          | 0.000      | 0.462   |
| s(C313)                                                   |          | 0.831          | 3.812      | 0.032   |
| s(C320)                                                   |          | 0.000          | 0.000      | 0.522   |
| s(C321)                                                   |          | 0.759          | 2.934      | 0.049   |
| s(C330)                                                   |          | 0.988          | 38.116     | < 0.001 |
| s(C410)                                                   |          | 0.424          | 0.775      | 0.176   |
| s(C511)                                                   |          | 1.014          | 111.684    | < 0.001 |

| Grey Heron ( <i>Ardea cinerea</i> ) — Model C-NB-GAM |          |                |            |         |
|------------------------------------------------------|----------|----------------|------------|---------|
| Parametric terms                                     | Estimate | Standard error | z-value    | p-value |
| Intercept                                            | -9.742   | 1.568          | -6.213     | < 0.001 |
| Year 1995                                            | 0.046    | 0.221          | 0.207      | 0.836   |
| Year 1996                                            | 0.269    | 0.211          | 1.278      | 0.201   |
| Year 1999                                            | 0.814    | 0.199          | 4.091      | < 0.001 |
| Year 2000                                            | 0.886    | 0.193          | 4.593      | < 0.001 |
| Year 2001                                            | 0.947    | 0.193          | 4.910      | < 0.001 |
| Year 2002                                            | 0.637    | 0.214          | 2.973      | 0.003   |
| Year 2003                                            | 0.776    | 0.213          | 3.646      | < 0.001 |
| Year 2004                                            | 0.700    | 0.236          | 2.968      | 0.003   |
| Year 2005                                            | 0.855    | 0.192          | 4.446      | < 0.001 |
| Year 2006                                            | 0.762    | 0.196          | 3.895      | < 0.001 |
| Year 2007                                            | 0.452    | 0.211          | 2.147      | 0.032   |
| Year 2008                                            | 0.538    | 0.209          | 2.577      | 0.010   |
| Year 2009                                            | 0.628    | 0.202          | 3.110      | 0.002   |
| Year 2010                                            | 0.590    | 0.204          | 2.890      | 0.004   |
| Year 2011                                            | 0.810    | 0.200          | 4.050      | < 0.001 |
| Year 2012                                            | 0.635    | 0.206          | 3.085      | 0.002   |
| Year 2013                                            | 0.910    | 0.199          | 4.571      | < 0.001 |
| Year 2014                                            | 0.909    | 0.201          | 4.525      | < 0.001 |
| Year 2015                                            | 0.743    | 0.202          | 3.669      | < 0.001 |
| Year 2016                                            | 0.847    | 0.202          | 4.196      | < 0.001 |
| Year 2017                                            | 0.793    | 0.217          | 3.661      | < 0.001 |
| Year 2018                                            | 0.505    | 0.221          | 2.287      | 0.022   |
| Year 2019                                            | 0.621    | 0.219          | 2.838      | 0.005   |
| Sin                                                  | 0.003    | 0.031          | 0.105      | 0.916   |
| Cos                                                  | 0.015    | 0.047          | 0.326      | 0.744   |
| Smooth terms                                         | edf      |                | Chi square | p-value |
| s(X,Y)                                               | 2.935    |                | 76.038     | < 0.001 |
| s(Elevation)                                         | 2.867    |                | 225.553    | < 0.001 |
| s(Slope)                                             | 2.795    |                | 31.002     | < 0.001 |
| s(C110)                                              | 1.235    |                | 93.546     | < 0.001 |
| s(C112)                                              | 1.021    |                | 28.564     | < 0.001 |
| s(C211)                                              | 0.821    |                | 3.683      | 0.025   |
| s(C213)                                              | 2.738    |                | 162.063    | < 0.001 |
| s(C221)                                              | 0.640    |                | 1.695      | 0.102   |
| s(C222)                                              | 0.877    |                | 6.600      | 0.006   |
| s(C223)                                              | 0.006    |                | 0.004      | 0.393   |
| s(C224)                                              | 2.408    |                | 28.354     | < 0.001 |
| s(C231)                                              | 0.019    |                | 0.013      | 0.343   |
| s(C311)                                              | 2.739    |                | 27.867     | < 0.001 |
| s(C312)                                              | 0.829    |                | 3.816      | 0.031   |
| s(C313)                                              | 0.416    |                | 0.676      | 0.200   |
| s(C320)                                              | 0.746    |                | 2.794      | 0.052   |
| s(C321)                                              | 0.538    |                | 1.386      | 0.108   |
| s(C330)                                              | 0.000    |                | 0.000      | 0.472   |
| s(C410)                                              | 0.980    |                | 38.584     | < 0.001 |
| s(C511)                                              | 0.911    |                | 9.891      | < 0.001 |

| Black Kite ( <i>Milvus migrans</i> ) — Model C-ZINB-GAM |          |                |            |         |
|---------------------------------------------------------|----------|----------------|------------|---------|
| Binomial component                                      |          |                |            |         |
| Parametric terms                                        | Estimate | Standard error | z-value    | p-value |
| Intercept                                               | −2.105   | 0.027          | −77.000    | < 0.001 |
| Smooth terms                                            |          | edf            | Chi square | p-value |
| s(Elevation)                                            |          | 1.210          | 656.520    | < 0.001 |
| s(Urb <sub>2500</sub> )                                 |          | 1.040          | 47.190     | < 0.001 |
| s(For <sub>2500</sub> )                                 |          | 2.992          | 1251.260   | < 0.001 |
| Count component                                         |          |                |            |         |
| Parametric terms                                        | Estimate | Standard error | z-value    | p-value |
| Intercept                                               | −2.701   | 0.394          | −6.858     | < 0.001 |
| Year 1995                                               | 1.539    | 0.420          | 3.667      | < 0.001 |
| Year 1996                                               | 0.360    | 0.466          | 0.771      | 0.441   |
| Year 1999                                               | 0.591    | 0.416          | 1.422      | 0.155   |
| Year 2000                                               | 0.626    | 0.409          | 1.529      | 0.126   |
| Year 2001                                               | 0.281    | 0.448          | 0.627      | 0.530   |
| Year 2002                                               | 0.037    | 0.545          | 0.067      | 0.946   |
| Year 2003                                               | 0.210    | 0.493          | 0.427      | 0.669   |
| Year 2004                                               | 0.860    | 0.494          | 1.741      | 0.082   |
| Year 2005                                               | 0.099    | 0.457          | 0.216      | 0.829   |
| Year 2006                                               | 0.498    | 0.421          | 1.184      | 0.237   |
| Year 2007                                               | 0.028    | 0.495          | 0.057      | 0.954   |
| Year 2008                                               | −0.171   | 0.519          | −0.328     | 0.743   |
| Year 2009                                               | 0.407    | 0.459          | 0.887      | 0.375   |
| Year 2010                                               | 0.352    | 0.461          | 0.764      | 0.445   |
| Year 2011                                               | −0.826   | 0.530          | −1.560     | 0.119   |
| Year 2012                                               | 0.172    | 0.459          | 0.375      | 0.708   |
| Year 2013                                               | −0.007   | 0.482          | −0.014     | 0.989   |
| Year 2014                                               | 0.369    | 0.457          | 0.807      | 0.420   |
| Year 2015                                               | −0.050   | 0.482          | −0.104     | 0.917   |
| Year 2016                                               | 0.065    | 0.495          | 0.131      | 0.896   |
| Year 2017                                               | −0.387   | 0.571          | −0.679     | 0.497   |
| Year 2018                                               | −0.200   | 0.534          | −0.375     | 0.708   |
| Year 2019                                               | −0.141   | 0.532          | −0.265     | 0.791   |
| Sin                                                     | 0.106    | 0.078          | 1.368      | 0.171   |
| Cos                                                     | −0.111   | 0.118          | −0.941     | 0.347   |
| Smooth terms                                            |          | edf            | Chi square | p-value |
| s(X, Y)                                                 |          | 1.952          | 49.583     | < 0.001 |
| s(Elevation)                                            |          | 1.284          | 41.739     | < 0.001 |
| s(Slope)                                                |          | 0.642          | 1.655      | 0.098   |
| s(C110)                                                 |          | 1.049          | 27.820     | < 0.001 |
| s(C112)                                                 |          | 0.983          | 20.901     | < 0.001 |
| s(C211)                                                 |          | 1.278          | 42.891     | < 0.001 |
| s(C213)                                                 |          | 0.952          | 12.459     | < 0.001 |
| s(C221)                                                 |          | 0.890          | 7.124      | 0.005   |
| s(C222)                                                 |          | 0.000          | 0.000      | 0.863   |
| s(C223)                                                 |          | 0.000          | 0.000      | 0.693   |
| s(C224)                                                 |          | 0.320          | 0.446      | 0.236   |
| s(C231)                                                 |          | 0.000          | 0.000      | 0.334   |
| s(C311)                                                 |          | 1.455          | 53.163     | < 0.001 |
| s(C312)                                                 |          | 0.957          | 11.462     | < 0.001 |
| s(C313)                                                 |          | 1.021          | 26.835     | < 0.001 |
| s(C320)                                                 |          | 0.670          | 1.828      | 0.097   |
| s(C321)                                                 |          | 0.000          | 0.000      | 0.889   |
| s(C330)                                                 |          | 0.000          | 0.000      | 0.883   |
| s(C410)                                                 |          | 0.000          | 0.000      | 0.759   |
| s(C511)                                                 |          | 0.942          | 14.729     | < 0.001 |

| Common Buzzard ( <i>Buteo buteo</i> ) — Model C-P-GAM |          |                |            |         |
|-------------------------------------------------------|----------|----------------|------------|---------|
| Parametric terms                                      | Estimate | Standard error | z-value    | p-value |
| Intercept                                             | −4.698   | 0.451          | −10.414    | < 0.001 |
| Year 1995                                             | 0.617    | 0.517          | 1.194      | 0.232   |
| Year 1996                                             | 0.373    | 0.527          | 0.708      | 0.479   |
| Year 1999                                             | 1.368    | 0.463          | 2.956      | 0.003   |
| Year 2000                                             | 1.442    | 0.459          | 3.141      | 0.002   |
| Year 2001                                             | 1.302    | 0.469          | 2.775      | 0.006   |
| Year 2002                                             | 1.676    | 0.472          | 3.554      | < 0.001 |
| Year 2003                                             | 1.152    | 0.496          | 2.322      | 0.020   |
| Year 2004                                             | 1.499    | 0.499          | 3.007      | 0.003   |
| Year 2005                                             | 1.061    | 0.476          | 2.232      | 0.026   |
| Year 2006                                             | 1.292    | 0.468          | 2.759      | 0.006   |
| Year 2007                                             | 0.554    | 0.513          | 1.080      | 0.280   |
| Year 2008                                             | 1.002    | 0.496          | 2.021      | 0.043   |
| Year 2009                                             | 0.996    | 0.494          | 2.016      | 0.044   |
| Year 2010                                             | 1.234    | 0.484          | 2.553      | 0.011   |
| Year 2011                                             | 0.762    | 0.494          | 1.544      | 0.123   |
| Year 2012                                             | 0.971    | 0.490          | 1.980      | 0.048   |
| Year 2013                                             | 1.752    | 0.469          | 3.737      | < 0.001 |
| Year 2014                                             | 1.180    | 0.485          | 2.435      | 0.015   |
| Year 2015                                             | 1.488    | 0.476          | 3.124      | 0.002   |
| Year 2016                                             | 1.492    | 0.476          | 3.137      | 0.002   |
| Year 2017                                             | 1.000    | 0.506          | 1.975      | 0.048   |
| Year 2018                                             | 0.729    | 0.521          | 1.398      | 0.162   |
| Year 2019                                             | 1.167    | 0.496          | 2.353      | 0.019   |
| Sin                                                   | −0.013   | 0.053          | −0.250     | 0.802   |
| Cos                                                   | −0.035   | 0.080          | −0.434     | 0.664   |
| Smooth terms                                          |          | edf            | Chi square | p-value |
| s(X,Y)                                                |          | 2.959          | 48.721     | < 0.001 |
| s(Elevation)                                          |          | 2.575          | 75.756     | < 0.001 |
| s(Slope)                                              |          | 0.675          | 3.120      | 0.027   |
| s(C110)                                               |          | 1.027          | 47.106     | < 0.001 |
| s(C112)                                               |          | 0.986          | 19.469     | < 0.001 |
| s(C211)                                               |          | 0.001          | 0.000      | 0.737   |
| s(C213)                                               |          | 2.269          | 17.428     | < 0.001 |
| s(C221)                                               |          | 0.012          | 0.012      | 0.305   |
| s(C222)                                               |          | 0.000          | 0.000      | 0.529   |
| s(C223)                                               |          | 0.000          | 0.000      | 0.498   |
| s(C224)                                               |          | 0.003          | 0.003      | 0.348   |
| s(C231)                                               |          | 0.892          | 16.076     | < 0.001 |
| s(C311)                                               |          | 2.034          | 5.661      | 0.041   |
| s(C312)                                               |          | 0.000          | 0.000      | 0.463   |
| s(C313)                                               |          | 0.797          | 3.220      | 0.041   |
| s(C320)                                               |          | 2.823          | 7.859      | 0.039   |
| s(C321)                                               |          | 0.000          | 0.000      | 0.545   |
| s(C330)                                               |          | 0.000          | 0.000      | 0.495   |
| s(C410)                                               |          | 0.854          | 6.808      | 0.005   |
| s(C511)                                               |          | 1.614          | 6.214      | 0.022   |

| Common Kestrel ( <i>Falcon tinnunculus</i> ) — Model C-P-GAM |          |                |            |         |
|--------------------------------------------------------------|----------|----------------|------------|---------|
| Parametric terms                                             | Estimate | Standard error | z-value    | p-value |
| Intercept                                                    | −4.287   | 0.358          | −11.964    | < 0.001 |
| Year 1995                                                    | −0.286   | 0.465          | −0.614     | 0.539   |
| Year 1996                                                    | −0.514   | 0.475          | −1.083     | 0.279   |
| Year 1999                                                    | 0.254    | 0.414          | 0.614      | 0.539   |
| Year 2000                                                    | 0.630    | 0.384          | 1.642      | 0.101   |
| Year 2001                                                    | 0.946    | 0.378          | 2.502      | 0.012   |
| Year 2002                                                    | 0.633    | 0.414          | 1.531      | 0.126   |
| Year 2003                                                    | 0.868    | 0.399          | 2.176      | 0.030   |
| Year 2004                                                    | 1.137    | 0.404          | 2.814      | 0.005   |
| Year 2005                                                    | 1.043    | 0.373          | 2.797      | 0.005   |
| Year 2006                                                    | 1.278    | 0.371          | 3.442      | < 0.001 |
| Year 2007                                                    | 0.970    | 0.387          | 2.506      | 0.012   |
| Year 2008                                                    | 1.145    | 0.384          | 2.985      | 0.003   |
| Year 2009                                                    | 0.670    | 0.395          | 1.696      | 0.090   |
| Year 2010                                                    | 0.992    | 0.386          | 2.568      | 0.010   |
| Year 2011                                                    | 0.764    | 0.389          | 1.966      | 0.049   |
| Year 2012                                                    | 0.906    | 0.386          | 2.349      | 0.019   |
| Year 2013                                                    | 1.022    | 0.382          | 2.676      | 0.007   |
| Year 2014                                                    | 1.158    | 0.379          | 3.052      | 0.002   |
| Year 2015                                                    | 1.212    | 0.378          | 3.205      | 0.001   |
| Year 2016                                                    | 1.361    | 0.376          | 3.617      | < 0.001 |
| Year 2017                                                    | 1.383    | 0.384          | 3.604      | < 0.001 |
| Year 2018                                                    | 0.475    | 0.425          | 1.117      | 0.264   |
| Year 2019                                                    | 1.019    | 0.396          | 2.575      | 0.010   |
| Sin                                                          | 0.030    | 0.051          | 0.590      | 0.555   |
| Cos                                                          | −0.080   | 0.077          | −1.041     | 0.298   |
| Smooth terms                                                 | edf      |                | Chi square | p-value |
| s(X,Y)                                                       | 1.533    |                | 9.015      | 0.002   |
| s(Elevation)                                                 | 1.828    |                | 3.207      | 0.127   |
| s(Slope)                                                     | 2.620    |                | 22.790     | < 0.001 |
| s(C110)                                                      | 0.656    |                | 4.368      | 0.006   |
| s(C112)                                                      | 0.437    |                | 0.964      | 0.126   |
| s(C211)                                                      | 0.967    |                | 26.608     | < 0.001 |
| s(C213)                                                      | 0.000    |                | 0.000      | 0.533   |
| s(C221)                                                      | 0.807    |                | 3.283      | 0.040   |
| s(C222)                                                      | 0.000    |                | 0.000      | 0.688   |
| s(C223)                                                      | 0.004    |                | 0.000      | 0.959   |
| s(C224)                                                      | 0.000    |                | 0.000      | 0.987   |
| s(C231)                                                      | 1.179    |                | 48.353     | < 0.001 |
| s(C311)                                                      | 1.985    |                | 13.373     | < 0.001 |
| s(C312)                                                      | 0.940    |                | 14.292     | < 0.001 |
| s(C313)                                                      | 0.854    |                | 9.731      | < 0.001 |
| s(C320)                                                      | 0.391    |                | 0.652      | 0.186   |
| s(C321)                                                      | 0.921    |                | 14.734     | 0.000   |
| s(C330)                                                      | 0.911    |                | 11.302     | < 0.001 |
| s(C410)                                                      | 0.001    |                | 0.000      | 0.552   |
| s(C511)                                                      | 0.894    |                | 4.980      | 0.017   |

| Common Quail ( <i>Coturnix coturnix</i> ) — Model C-ZIP-GAM |          |                |            |         |
|-------------------------------------------------------------|----------|----------------|------------|---------|
| Binomial component                                          |          |                |            |         |
| Parametric terms                                            | Estimate | Standard error | z-value    | p-value |
| Intercept                                                   | −1.455   | 0.023          | −62.340    | < 0.001 |
| Smooth terms                                                |          | edf            | Chi square | p-value |
| s(Elevation)                                                |          | 2.990          | 480.600    | < 0.001 |
| s(Urb <sub>2500</sub> )                                     |          | 1.106          | 179.800    | < 0.001 |
| s(For <sub>2500</sub> )                                     |          | 1.907          | 502.200    | < 0.001 |
| Count component                                             |          |                |            |         |
| Parametric terms                                            | Estimate | Standard error | z-value    | p-value |
| Intercept                                                   | −3.430   | 0.334          | −10.270    | < 0.001 |
| Year 1995                                                   | 0.562    | 0.347          | 1.621      | 0.105   |
| Year 1996                                                   | −1.285   | 0.509          | −2.524     | 0.012   |
| Year 1999                                                   | 0.208    | 0.380          | 0.547      | 0.585   |
| Year 2000                                                   | 0.660    | 0.338          | 1.953      | 0.051   |
| Year 2001                                                   | 0.762    | 0.334          | 2.281      | 0.023   |
| Year 2002                                                   | 0.168    | 0.395          | 0.425      | 0.671   |
| Year 2003                                                   | 0.237    | 0.400          | 0.592      | 0.554   |
| Year 2004                                                   | 0.113    | 0.440          | 0.256      | 0.798   |
| Year 2005                                                   | 1.370    | 0.316          | 4.339      | < 0.001 |
| Year 2006                                                   | 0.741    | 0.334          | 2.222      | 0.026   |
| Year 2007                                                   | 0.115    | 0.366          | 0.313      | 0.754   |
| Year 2008                                                   | 0.269    | 0.381          | 0.706      | 0.480   |
| Year 2009                                                   | 0.157    | 0.375          | 0.418      | 0.676   |
| Year 2010                                                   | 0.797    | 0.342          | 2.328      | 0.020   |
| Year 2011                                                   | 0.094    | 0.371          | 0.253      | 0.800   |
| Year 2012                                                   | −0.035   | 0.378          | −0.093     | 0.926   |
| Year 2013                                                   | −0.250   | 0.394          | −0.636     | 0.525   |
| Year 2014                                                   | −0.486   | 0.439          | −1.107     | 0.268   |
| Year 2015                                                   | −0.281   | 0.412          | −0.684     | 0.494   |
| Year 2016                                                   | −0.490   | 0.429          | −1.143     | 0.253   |
| Year 2017                                                   | −0.573   | 0.485          | −1.182     | 0.237   |
| Year 2018                                                   | −1.049   | 0.585          | −1.793     | 0.073   |
| Year 2019                                                   | 0.240    | 0.394          | 0.609      | 0.543   |
| Sin                                                         | 0.013    | 0.064          | 0.202      | 0.840   |
| Cos                                                         | −0.039   | 0.095          | −0.411     | 0.681   |
| Smooth terms                                                |          | edf            | Chi square | p-value |
| s(X, Y)                                                     |          | 2.907          | 25.309     | < 0.001 |
| s(Elevation)                                                |          | 1.197          | 25.483     | < 0.001 |
| s(Slope)                                                    |          | 1.035          | 7.790      | 0.002   |
| s(C110)                                                     |          | 0.808          | 6.106      | 0.004   |
| s(C112)                                                     |          | 0.869          | 7.004      | 0.004   |
| s(C211)                                                     |          | 1.090          | 42.005     | < 0.001 |
| s(C213)                                                     |          | 0.861          | 9.760      | < 0.001 |
| s(C221)                                                     |          | 2.506          | 21.686     | < 0.001 |
| s(C222)                                                     |          | 0.929          | 12.181     | < 0.001 |
| s(C223)                                                     |          | 0.000          | 0.000      | 0.534   |
| s(C224)                                                     |          | 0.001          | 0.000      | 0.724   |
| s(C231)                                                     |          | 1.665          | 63.280     | < 0.001 |
| s(C311)                                                     |          | 2.629          | 17.432     | < 0.001 |
| s(C312)                                                     |          | 1.809          | 8.574      | 0.007   |
| s(C313)                                                     |          | 0.877          | 5.583      | 0.011   |
| s(C320)                                                     |          | 0.000          | 0.000      | 0.706   |
| s(C321)                                                     |          | 0.193          | 0.235      | 0.261   |
| s(C330)                                                     |          | 2.907          | 25.309     | < 0.001 |
| s(C410)                                                     |          | 1.197          | 25.483     | < 0.001 |
| s(C511)                                                     |          | 1.035          | 7.790      | 0.002   |

| Common Pheasant ( <i>Phasianus colchicus</i> ) — Model C-NB-GAM |          |                |            |         |
|-----------------------------------------------------------------|----------|----------------|------------|---------|
| Parametric terms                                                | Estimate | Standard error | z-value    | p-value |
| Intercept                                                       | −4.305   | 0.222          | −19.389    | < 0.001 |
| Year 1995                                                       | −1.141   | 0.272          | −4.193     | < 0.001 |
| Year 1996                                                       | −0.584   | 0.241          | −2.426     | 0.015   |
| Year 1999                                                       | −0.046   | 0.200          | −0.230     | 0.818   |
| Year 2000                                                       | 0.300    | 0.194          | 1.546      | 0.122   |
| Year 2001                                                       | 0.087    | 0.202          | 0.430      | 0.667   |
| Year 2002                                                       | −0.048   | 0.232          | −0.205     | 0.837   |
| Year 2003                                                       | 0.314    | 0.216          | 1.452      | 0.147   |
| Year 2004                                                       | −0.290   | 0.294          | −0.986     | 0.324   |
| Year 2005                                                       | −0.012   | 0.201          | −0.060     | 0.952   |
| Year 2006                                                       | 0.337    | 0.194          | 1.735      | 0.083   |
| Year 2007                                                       | 0.748    | 0.198          | 3.775      | < 0.001 |
| Year 2008                                                       | 0.622    | 0.205          | 3.040      | 0.002   |
| Year 2009                                                       | 0.942    | 0.194          | 4.858      | < 0.001 |
| Year 2010                                                       | 0.927    | 0.195          | 4.748      | < 0.001 |
| Year 2011                                                       | 0.806    | 0.193          | 4.171      | < 0.001 |
| Year 2012                                                       | 0.872    | 0.195          | 4.466      | < 0.001 |
| Year 2013                                                       | 0.979    | 0.191          | 5.125      | < 0.001 |
| Year 2014                                                       | 0.782    | 0.197          | 3.960      | < 0.001 |
| Year 2015                                                       | 0.926    | 0.196          | 4.733      | < 0.001 |
| Year 2016                                                       | 0.874    | 0.196          | 4.452      | < 0.001 |
| Year 2017                                                       | 0.750    | 0.208          | 3.610      | < 0.001 |
| Year 2018                                                       | 0.772    | 0.208          | 3.714      | < 0.001 |
| Year 2019                                                       | 0.604    | 0.213          | 2.839      | 0.005   |
| Sin                                                             | −0.001   | 0.034          | −0.031     | 0.975   |
| Cos                                                             | 0.039    | 0.051          | 0.767      | 0.443   |
| Smooth terms                                                    | edf      |                | Chi square | p-value |
| s(X,Y)                                                          | 1.981    |                | 101.266    | < 0.001 |
| s(Elevation)                                                    | 1.395    |                | 93.493     | < 0.001 |
| s(Slope)                                                        | 1.977    |                | 22.295     | < 0.001 |
| s(C110)                                                         | 1.377    |                | 177.353    | < 0.001 |
| s(C112)                                                         | 1.104    |                | 74.221     | < 0.001 |
| s(C211)                                                         | 0.001    |                | 0.000      | 0.752   |
| s(C213)                                                         | 0.949    |                | 13.721     | < 0.001 |
| s(C221)                                                         | 0.225    |                | 0.293      | 0.249   |
| s(C222)                                                         | 0.001    |                | 0.000      | 0.789   |
| s(C223)                                                         | 0.001    |                | 0.000      | 0.713   |
| s(C224)                                                         | 2.213    |                | 123.386    | < 0.001 |
| s(C231)                                                         | 0.731    |                | 2.575      | 0.058   |
| s(C311)                                                         | 2.640    |                | 130.881    | < 0.001 |
| s(C312)                                                         | 0.143    |                | 0.182      | 0.259   |
| s(C313)                                                         | 0.001    |                | 0.000      | 0.936   |
| s(C320)                                                         | 0.448    |                | 0.856      | 0.166   |
| s(C321)                                                         | 0.002    |                | 0.001      | 0.403   |
| s(C330)                                                         | 0.005    |                | 0.005      | 0.329   |
| s(C410)                                                         | 0.001    |                | 0.000      | 0.759   |
| s(C511)                                                         | 0.741    |                | 2.803      | 0.050   |

| Common Moorhen ( <i>Gallinula chloropus</i> ) — Model C-NB-GAM |          |                |            |         |
|----------------------------------------------------------------|----------|----------------|------------|---------|
| Parametric terms                                               | Estimate | Standard error | z-value    | p-value |
| Intercept                                                      | −5.900   | 0.969          | −6.086     | < 0.001 |
| Year 1995                                                      | −0.097   | 0.228          | −0.426     | 0.670   |
| Year 1996                                                      | 0.248    | 0.221          | 1.125      | 0.261   |
| Year 1999                                                      | −0.317   | 0.233          | −1.363     | 0.173   |
| Year 2000                                                      | 0.461    | 0.206          | 2.235      | 0.025   |
| Year 2001                                                      | 0.416    | 0.207          | 2.010      | 0.044   |
| Year 2002                                                      | 0.026    | 0.243          | 0.109      | 0.913   |
| Year 2003                                                      | 0.140    | 0.250          | 0.560      | 0.576   |
| Year 2004                                                      | −0.089   | 0.305          | −0.291     | 0.771   |
| Year 2005                                                      | 0.272    | 0.207          | 1.312      | 0.189   |
| Year 2006                                                      | 0.158    | 0.215          | 0.737      | 0.461   |
| Year 2007                                                      | −0.306   | 0.248          | −1.236     | 0.217   |
| Year 2008                                                      | 0.211    | 0.229          | 0.922      | 0.357   |
| Year 2009                                                      | 0.187    | 0.220          | 0.851      | 0.395   |
| Year 2010                                                      | 0.436    | 0.215          | 2.025      | 0.043   |
| Year 2011                                                      | −0.281   | 0.244          | −1.154     | 0.248   |
| Year 2012                                                      | 0.050    | 0.238          | 0.210      | 0.834   |
| Year 2013                                                      | 0.228    | 0.226          | 1.012      | 0.312   |
| Year 2014                                                      | 0.047    | 0.239          | 0.195      | 0.846   |
| Year 2015                                                      | 0.223    | 0.224          | 0.995      | 0.320   |
| Year 2016                                                      | 0.227    | 0.228          | 0.996      | 0.320   |
| Year 2017                                                      | 0.380    | 0.243          | 1.559      | 0.119   |
| Year 2018                                                      | 0.132    | 0.245          | 0.540      | 0.589   |
| Year 2019                                                      | 0.081    | 0.257          | 0.314      | 0.753   |
| Sin                                                            | 0.018    | 0.042          | 0.438      | 0.661   |
| Cos                                                            | 0.049    | 0.063          | 0.769      | 0.442   |
| Smooth terms                                                   | edf      |                | Chi square | p-value |
| s(X,Y)                                                         | 1.640    |                | 23.987     | < 0.001 |
| s(Elevation)                                                   | 1.142    |                | 62.351     | < 0.001 |
| s(Slope)                                                       | 0.876    |                | 5.000      | 0.013   |
| s(C110)                                                        | 1.184    |                | 79.117     | < 0.001 |
| s(C112)                                                        | 0.959    |                | 13.000     | < 0.001 |
| s(C211)                                                        | 0.088    |                | 0.098      | 0.276   |
| s(C213)                                                        | 1.316    |                | 253.632    | < 0.001 |
| s(C221)                                                        | 0.006    |                | 0.004      | 0.370   |
| s(C222)                                                        | 0.579    |                | 1.204      | 0.149   |
| s(C223)                                                        | 0.632    |                | 0.144      | 0.633   |
| s(C224)                                                        | 0.669    |                | 1.944      | 0.085   |
| s(C231)                                                        | 0.001    |                | 0.000      | 0.772   |
| s(C311)                                                        | 2.484    |                | 26.561     | < 0.001 |
| s(C312)                                                        | 0.000    |                | 0.000      | 0.786   |
| s(C313)                                                        | 0.839    |                | 3.918      | 0.030   |
| s(C320)                                                        | 0.666    |                | 1.842      | 0.095   |
| s(C321)                                                        | 0.000    |                | 0.000      | 0.634   |
| s(C330)                                                        | 0.857    |                | 5.362      | 0.012   |
| s(C410)                                                        | 2.848    |                | 371.328    | < 0.001 |
| s(C511)                                                        | 2.891    |                | 107.743    | < 0.001 |



| Northern Lapwing ( <i>Vanellus vanellus</i> ) — Model C-NB-GAM |          |                |         |         |
|----------------------------------------------------------------|----------|----------------|---------|---------|
| Parametric terms                                               | Estimate | Standard error | z-value | p-value |
| Intercept                                                      | −15.198  | 2.237          | −6.794  | < 0.001 |
| Year 1996                                                      | −2.095   | 0.863          | −2.428  | 0.015   |
| Year 1999                                                      | −0.003   | 0.599          | −0.004  | 0.997   |
| Year 2000                                                      | 0.074    | 0.513          | 0.145   | 0.885   |
| Year 2001                                                      | 0.651    | 0.492          | 1.322   | 0.186   |
| Year 2002                                                      | 0.494    | 0.547          | 0.903   | 0.367   |
| Year 2003                                                      | 1.027    | 0.582          | 1.765   | 0.078   |
| Year 2004                                                      | 1.425    | 0.572          | 2.489   | 0.013   |
| Year 2005                                                      | 1.036    | 0.482          | 2.150   | 0.032   |
| Year 2006                                                      | 0.443    | 0.524          | 0.846   | 0.398   |
| Year 2007                                                      | 0.922    | 0.514          | 1.793   | 0.073   |
| Year 2008                                                      | 1.345    | 0.500          | 2.692   | 0.007   |
| Year 2009                                                      | 1.105    | 0.488          | 2.267   | 0.023   |
| Year 2010                                                      | 1.510    | 0.481          | 3.135   | 0.002   |
| Year 2011                                                      | 1.102    | 0.502          | 2.194   | 0.028   |
| Year 2012                                                      | 0.923    | 0.511          | 1.808   | 0.071   |
| Year 2013                                                      | 1.573    | 0.499          | 3.154   | 0.002   |
| Year 2014                                                      | 2.585    | 0.481          | 5.375   | < 0.001 |
| Year 2015                                                      | 1.679    | 0.490          | 3.429   | < 0.001 |
| Year 2016                                                      | 1.962    | 0.482          | 4.069   | < 0.001 |
| Year 2017                                                      | 2.134    | 0.525          | 4.063   | < 0.001 |
| Year 2018                                                      | 1.338    | 0.534          | 2.506   | 0.012   |
| Year 2019                                                      | 1.780    | 0.526          | 3.388   | < 0.001 |
| Sin                                                            | 0.343    | 0.097          | 3.520   | < 0.001 |
| Cos                                                            | −0.338   | 0.155          | −2.176  | 0.030   |
| Smooth terms                                                   | edf      | Chi square     | p-value |         |
| s(X,Y)                                                         | 1.924    | 32.105         | < 0.001 |         |
| s(Elevation)                                                   | 0.000    | 0.000          | 0.830   |         |
| s(Slope)                                                       | 0.952    | 17.976         | < 0.001 |         |
| s(C110)                                                        | 0.911    | 7.397          | 0.004   |         |
| s(C112)                                                        | 0.000    | 0.000          | 0.481   |         |
| s(C211)                                                        | 1.773    | 85.008         | < 0.001 |         |
| s(C213)                                                        | 2.475    | 257.576        | < 0.001 |         |
| s(C221)                                                        | 0.000    | 0.000          | 0.966   |         |
| s(C222)                                                        | 0.000    | 0.000          | 0.651   |         |
| s(C223)                                                        | 0.000    | 0.000          | 0.816   |         |
| s(C224)                                                        | 0.946    | 14.829         | < 0.001 |         |
| s(C231)                                                        | 0.000    | 0.000          | 0.827   |         |
| s(C311)                                                        | 0.002    | 0.002          | 0.327   |         |
| s(C312)                                                        | 0.002    | 0.001          | 0.455   |         |
| s(C313)                                                        | 0.673    | 1.615          | 0.121   |         |
| s(C320)                                                        | 0.586    | 1.094          | 0.172   |         |
| s(C321)                                                        | 0.604    | 2.243          | 0.054   |         |
| s(C330)                                                        | 0.778    | 2.644          | 0.065   |         |
| s(C410)                                                        | 0.955    | 20.504         | < 0.001 |         |
| s(C511)                                                        | 0.974    | 29.611         | < 0.001 |         |

| <b>Feral Pigeon (<i>Columba livia domestica</i>) — Model C-ZINB-GAM</b> |                 |                       |                   |                |
|-------------------------------------------------------------------------|-----------------|-----------------------|-------------------|----------------|
| <b>Binomial component</b>                                               |                 |                       |                   |                |
| <b>Parametric terms</b>                                                 | <b>Estimate</b> | <b>Standard error</b> | <b>z-value</b>    | <b>p-value</b> |
| Intercept                                                               | 0.502           | 0.027                 | 18.950            | < 0.001        |
| <b>Smooth terms</b>                                                     |                 | <b>edf</b>            | <b>Chi square</b> | <b>p-value</b> |
| s(Elevation)                                                            |                 | 2.988                 | 757.300           | < 0.001        |
| s(Urb <sub>2500</sub> )                                                 |                 | 1.162                 | 1017.600          | < 0.001        |
| s(For <sub>2500</sub> )                                                 |                 | 2.723                 | 464.300           | < 0.001        |
| <b>Count component</b>                                                  |                 |                       |                   |                |
| <b>Parametric terms</b>                                                 | <b>Estimate</b> | <b>Standard error</b> | <b>z-value</b>    | <b>p-value</b> |
| Intercept                                                               | −2.205          | 0.174                 | −12.654           | < 0.001        |
| Year 1995                                                               | 0.099           | 0.179                 | 0.553             | 0.580          |
| Year 1996                                                               | −0.297          | 0.178                 | −1.666            | 0.096          |
| Year 1999                                                               | 0.107           | 0.180                 | 0.593             | 0.553          |
| Year 2000                                                               | 0.897           | 0.162                 | 5.526             | < 0.001        |
| Year 2001                                                               | 0.946           | 0.162                 | 5.832             | < 0.001        |
| Year 2002                                                               | 1.316           | 0.177                 | 7.456             | < 0.001        |
| Year 2003                                                               | 0.373           | 0.184                 | 2.023             | 0.043          |
| Year 2004                                                               | 1.519           | 0.190                 | 7.995             | < 0.001        |
| Year 2005                                                               | 0.942           | 0.161                 | 5.843             | < 0.001        |
| Year 2006                                                               | 1.052           | 0.162                 | 6.513             | < 0.001        |
| Year 2007                                                               | 0.039           | 0.177                 | 0.220             | 0.826          |
| Year 2008                                                               | −0.039          | 0.178                 | −0.222            | 0.824          |
| Year 2009                                                               | 0.024           | 0.173                 | 0.136             | 0.892          |
| Year 2010                                                               | 0.241           | 0.171                 | 1.409             | 0.159          |
| Year 2011                                                               | 0.523           | 0.167                 | 3.125             | 0.002          |
| Year 2012                                                               | 0.206           | 0.174                 | 1.186             | 0.235          |
| Year 2013                                                               | 0.319           | 0.170                 | 1.872             | 0.061          |
| Year 2014                                                               | 0.453           | 0.166                 | 2.738             | 0.006          |
| Year 2015                                                               | 0.438           | 0.170                 | 2.580             | 0.010          |
| Year 2016                                                               | 0.390           | 0.171                 | 2.272             | 0.023          |
| Year 2017                                                               | 0.431           | 0.185                 | 2.335             | 0.020          |
| Year 2018                                                               | 0.478           | 0.184                 | 2.603             | 0.009          |
| Year 2019                                                               | 0.502           | 0.183                 | 2.739             | 0.006          |
| Sin                                                                     | 0.052           | 0.031                 | 1.707             | 0.088          |
| Cos                                                                     | −0.060          | 0.047                 | −1.290            | 0.197          |
| <b>Smooth terms</b>                                                     |                 | <b>edf</b>            | <b>Chi square</b> | <b>p-value</b> |
| s(X, Y)                                                                 |                 | 1.996                 | 323.828           | < 0.001        |
| s(Elevation)                                                            |                 | 1.138                 | 11.942            | < 0.001        |
| s(Slope)                                                                |                 | 1.035                 | 15.402            | < 0.001        |
| s(C110)                                                                 |                 | 0.652                 | 1.716             | 0.094          |
| s(C112)                                                                 |                 | 2.600                 | 33.562            | < 0.001        |
| s(C211)                                                                 |                 | 0.924                 | 6.811             | 0.003          |
| s(C213)                                                                 |                 | 0.034                 | 0.022             | 0.396          |
| s(C221)                                                                 |                 | 0.950                 | 17.385            | < 0.001        |
| s(C222)                                                                 |                 | 0.004                 | 0.003             | 0.418          |
| s(C223)                                                                 |                 | 0.850                 | 5.136             | 0.014          |
| s(C224)                                                                 |                 | 0.999                 | 47.638            | < 0.001        |
| s(C231)                                                                 |                 | 0.001                 | 0.000             | 0.356          |
| s(C311)                                                                 |                 | 1.669                 | 254.304           | < 0.001        |
| s(C312)                                                                 |                 | 1.003                 | 22.758            | < 0.001        |
| s(C313)                                                                 |                 | 1.063                 | 47.353            | < 0.001        |
| s(C320)                                                                 |                 | 0.906                 | 8.368             | 0.002          |
| s(C321)                                                                 |                 | 0.797                 | 3.127             | 0.044          |
| s(C330)                                                                 |                 | 0.001                 | 0.000             | 0.784          |
| s(C410)                                                                 |                 | 0.970                 | 28.490            | < 0.001        |
| s(C511)                                                                 |                 | 0.949                 | 17.730            | < 0.001        |

| Common Wood Pigeon ( <i>Columba palumbus</i> ) — Model C-ZIP-GAM |          |                |            |         |
|------------------------------------------------------------------|----------|----------------|------------|---------|
| Binomial component                                               |          |                |            |         |
| Parametric terms                                                 | Estimate | Standard error | z-value    | p-value |
| Intercept                                                        | 0.575    | 0.020          | 28.700     | < 0.001 |
| Smooth terms                                                     |          | edf            | Chi square | p-value |
| s(Elevation)                                                     |          | 1.170          | 737.300    | < 0.001 |
| s(Urb <sub>2500</sub> )                                          |          | 2.981          | 647.900    | < 0.001 |
| s(For <sub>2500</sub> )                                          |          | 2.990          | 480.700    | < 0.001 |
| Count component                                                  |          |                |            |         |
| Parametric terms                                                 | Estimate | Standard error | z-value    | p-value |
| Intercept                                                        | -2.529   | 0.174          | -14.505    | < 0.001 |
| Year 1995                                                        | -1.087   | 0.235          | -4.626     | < 0.001 |
| Year 1996                                                        | -0.308   | 0.179          | -1.720     | 0.085   |
| Year 1999                                                        | -0.019   | 0.169          | -0.110     | 0.912   |
| Year 2000                                                        | -0.462   | 0.185          | -2.494     | 0.013   |
| Year 2001                                                        | -0.634   | 0.225          | -2.818     | 0.005   |
| Year 2002                                                        | -0.572   | 0.225          | -2.540     | 0.011   |
| Year 2003                                                        | -0.644   | 0.264          | -2.440     | 0.015   |
| Year 2004                                                        | -0.374   | 0.182          | -2.057     | 0.040   |
| Year 2005                                                        | 0.327    | 0.163          | 2.007      | 0.045   |
| Year 2006                                                        | 0.072    | 0.180          | 0.402      | 0.688   |
| Year 2007                                                        | 0.272    | 0.175          | 1.554      | 0.120   |
| Year 2008                                                        | 0.420    | 0.171          | 2.461      | 0.014   |
| Year 2009                                                        | 0.684    | 0.165          | 4.139      | < 0.001 |
| Year 2010                                                        | 0.963    | 0.159          | 6.054      | < 0.001 |
| Year 2011                                                        | 0.832    | 0.165          | 5.057      | < 0.001 |
| Year 2012                                                        | 1.007    | 0.161          | 6.269      | < 0.001 |
| Year 2013                                                        | 1.086    | 0.157          | 6.897      | < 0.001 |
| Year 2014                                                        | 1.058    | 0.160          | 6.602      | < 0.001 |
| Year 2015                                                        | 1.299    | 0.158          | 8.233      | < 0.001 |
| Year 2016                                                        | 1.177    | 0.163          | 7.216      | < 0.001 |
| Year 2017                                                        | 1.334    | 0.161          | 8.274      | < 0.001 |
| Year 2018                                                        | 1.333    | 0.161          | 8.276      | < 0.001 |
| Year 2019                                                        | 0.006    | 0.027          | 0.219      | 0.827   |
| Sin                                                              | -0.199   | 0.043          | -4.605     | < 0.001 |
| Cos                                                              | -2.529   | 0.174          | -14.505    | < 0.001 |
| Smooth terms                                                     |          | edf            | Chi square | p-value |
| s(X, Y)                                                          |          | 1.950          | 72.541     | < 0.001 |
| s(Elevation)                                                     |          | 2.587          | 39.005     | < 0.001 |
| s(Slope)                                                         |          | 1.306          | 54.017     | < 0.001 |
| s(C110)                                                          |          | 0.001          | 0.000      | 0.753   |
| s(C112)                                                          |          | 0.988          | 21.845     | < 0.001 |
| s(C211)                                                          |          | 2.090          | 12.796     | < 0.001 |
| s(C213)                                                          |          | 1.009          | 34.233     | < 0.001 |
| s(C221)                                                          |          | 0.888          | 7.562      | 0.003   |
| s(C222)                                                          |          | 0.002          | 0.000      | 0.828   |
| s(C223)                                                          |          | 0.666          | 1.789      | 0.101   |
| s(C224)                                                          |          | 0.386          | 0.639      | 0.197   |
| s(C231)                                                          |          | 0.001          | 0.000      | 0.729   |
| s(C311)                                                          |          | 2.702          | 82.454     | < 0.001 |
| s(C312)                                                          |          | 0.043          | 0.043      | 0.316   |
| s(C313)                                                          |          | 0.856          | 5.323      | 0.012   |
| s(C320)                                                          |          | 0.173          | 0.212      | 0.266   |
| s(C321)                                                          |          | 0.847          | 4.372      | 0.022   |
| s(C330)                                                          |          | 0.804          | 3.792      | 0.029   |
| s(C410)                                                          |          | 0.315          | 0.438      | 0.238   |
| s(C511)                                                          |          | 0.002          | 0.000      | 0.891   |

| <b>Eurasian Collared Dove (<i>Streptopelia decaocto</i>) — Model C-ZINB-GAM</b> |                 |                       |                   |                |
|---------------------------------------------------------------------------------|-----------------|-----------------------|-------------------|----------------|
| <b>Binomial component</b>                                                       |                 |                       |                   |                |
| <b>Parametric terms</b>                                                         | <b>Estimate</b> | <b>Standard error</b> | <b>z-value</b>    | <b>p-value</b> |
| Intercept                                                                       | 0.667           | 0.020                 | 33.510            | < 0.001        |
| <b>Smooth terms</b>                                                             |                 | <b>edf</b>            | <b>Chi square</b> | <b>p-value</b> |
| s(Elevation)                                                                    |                 | 1.206                 | 857.000           | < 0.001        |
| s(Urb <sub>2500</sub> )                                                         |                 | 2.835                 | 469.300           | < 0.001        |
| s(For <sub>2500</sub> )                                                         |                 | 2.522                 | 1479.500          | < 0.001        |
| <b>Count component</b>                                                          |                 |                       |                   |                |
| <b>Parametric terms</b>                                                         | <b>Estimate</b> | <b>Standard error</b> | <b>z-value</b>    | <b>p-value</b> |
| Intercept                                                                       | −3.987          | 0.609                 | −6.547            | < 0.001        |
| Year 1995                                                                       | −0.267          | 0.155                 | −1.723            | 0.085          |
| Year 1996                                                                       | −0.076          | 0.137                 | −0.553            | 0.581          |
| Year 1999                                                                       | 0.441           | 0.137                 | 3.205             | 0.001          |
| Year 2000                                                                       | 0.816           | 0.123                 | 6.625             | < 0.001        |
| Year 2001                                                                       | 0.793           | 0.124                 | 6.409             | < 0.001        |
| Year 2002                                                                       | 0.859           | 0.130                 | 6.612             | < 0.001        |
| Year 2003                                                                       | 0.789           | 0.130                 | 6.049             | < 0.001        |
| Year 2004                                                                       | 0.782           | 0.141                 | 5.558             | < 0.001        |
| Year 2005                                                                       | 0.999           | 0.120                 | 8.328             | < 0.001        |
| Year 2006                                                                       | 0.920           | 0.121                 | 7.572             | < 0.001        |
| Year 2007                                                                       | 0.784           | 0.126                 | 6.243             | < 0.001        |
| Year 2008                                                                       | 0.723           | 0.126                 | 5.739             | < 0.001        |
| Year 2009                                                                       | 0.932           | 0.123                 | 7.592             | < 0.001        |
| Year 2010                                                                       | 0.888           | 0.124                 | 7.139             | < 0.001        |
| Year 2011                                                                       | 0.754           | 0.123                 | 6.146             | < 0.001        |
| Year 2012                                                                       | 0.951           | 0.123                 | 7.710             | < 0.001        |
| Year 2013                                                                       | 0.792           | 0.123                 | 6.462             | < 0.001        |
| Year 2014                                                                       | 0.721           | 0.122                 | 5.893             | < 0.001        |
| Year 2015                                                                       | 0.666           | 0.124                 | 5.391             | < 0.001        |
| Year 2016                                                                       | 0.810           | 0.123                 | 6.564             | < 0.001        |
| Year 2017                                                                       | 0.895           | 0.128                 | 6.977             | < 0.001        |
| Year 2018                                                                       | 0.938           | 0.127                 | 7.368             | < 0.001        |
| Year 2019                                                                       | 0.977           | 0.127                 | 7.712             | < 0.001        |
| Sin                                                                             | 0.018           | 0.018                 | 0.990             | 0.322          |
| Cos                                                                             | −0.041          | 0.027                 | −1.521            | 0.128          |
| <b>Smooth terms</b>                                                             |                 | <b>edf</b>            | <b>Chi square</b> | <b>p-value</b> |
| s(X, Y)                                                                         |                 | 2.967                 | 289.032           | < 0.001        |
| s(Elevation)                                                                    |                 | 2.906                 | 20.032            | < 0.001        |
| s(Slope)                                                                        |                 | 2.010                 | 66.178            | < 0.001        |
| s(C110)                                                                         |                 | 2.590                 | 1069.957          | < 0.001        |
| s(C112)                                                                         |                 | 2.942                 | 1047.404          | < 0.001        |
| s(C211)                                                                         |                 | 0.005                 | 0.001             | 0.661          |
| s(C213)                                                                         |                 | 1.831                 | 62.062            | < 0.001        |
| s(C221)                                                                         |                 | 0.269                 | 0.379             | 0.233          |
| s(C222)                                                                         |                 | 2.739                 | 5.245             | 0.125          |
| s(C223)                                                                         |                 | 0.000                 | 0.000             | 0.552          |
| s(C224)                                                                         |                 | 0.956                 | 24.219            | < 0.001        |
| s(C231)                                                                         |                 | 0.886                 | 8.591             | 0.002          |
| s(C311)                                                                         |                 | 2.159                 | 96.835            | < 0.001        |
| s(C312)                                                                         |                 | 0.001                 | 0.000             | 0.543          |
| s(C313)                                                                         |                 | 0.932                 | 11.455            | < 0.001        |
| s(C320)                                                                         |                 | 1.291                 | 3.072             | 0.101          |
| s(C321)                                                                         |                 | 0.229                 | 0.315             | 0.241          |
| s(C330)                                                                         |                 | 0.944                 | 18.358            | < 0.001        |
| s(C410)                                                                         |                 | 2.109                 | 25.165            | < 0.001        |
| s(C511)                                                                         |                 | 0.958                 | 23.479            | < 0.001        |

| European Turtle Dove ( <i>Streptopelia turtur</i> ) — Model C-ZIP-GAM |          |                |            |         |
|-----------------------------------------------------------------------|----------|----------------|------------|---------|
| Binomial component                                                    |          |                |            |         |
| Parametric terms                                                      | Estimate | Standard error | z-value    | p-value |
| Intercept                                                             | −0.469   | 0.019          | −24.720    | < 0.001 |
| Smooth terms                                                          |          | edf            | Chi square | p-value |
| s(Elevation)                                                          |          | 3.000          | 2447.200   | < 0.001 |
| s(Urb <sub>2500</sub> )                                               |          | 1.157          | 288.500    | < 0.001 |
| s(For <sub>2500</sub> )                                               |          | 2.999          | 1788.800   | < 0.001 |
| Count component                                                       |          |                |            |         |
| Parametric terms                                                      | Estimate | Standard error | z-value    | p-value |
| Intercept                                                             | −2.546   | 0.209          | −12.160    | < 0.001 |
| Year 1995                                                             | 0.037    | 0.152          | 0.244      | 0.807   |
| Year 1996                                                             | −1.128   | 0.211          | −5.349     | < 0.001 |
| Year 1999                                                             | 0.071    | 0.145          | 0.488      | 0.626   |
| Year 2000                                                             | 0.147    | 0.141          | 1.044      | 0.297   |
| Year 2001                                                             | −0.386   | 0.162          | −2.381     | 0.017   |
| Year 2002                                                             | −0.075   | 0.162          | −0.464     | 0.643   |
| Year 2003                                                             | −0.687   | 0.202          | −3.398     | < 0.001 |
| Year 2004                                                             | −0.371   | 0.243          | −1.528     | 0.126   |
| Year 2005                                                             | −0.355   | 0.154          | −2.306     | 0.021   |
| Year 2006                                                             | −0.332   | 0.153          | −2.171     | 0.030   |
| Year 2007                                                             | −0.010   | 0.151          | −0.065     | 0.948   |
| Year 2008                                                             | 0.023    | 0.156          | 0.148      | 0.882   |
| Year 2009                                                             | 0.252    | 0.148          | 1.704      | 0.088   |
| Year 2010                                                             | 0.248    | 0.146          | 1.701      | 0.089   |
| Year 2011                                                             | −0.302   | 0.155          | −1.953     | 0.051   |
| Year 2012                                                             | 0.072    | 0.153          | 0.469      | 0.639   |
| Year 2013                                                             | −0.149   | 0.157          | −0.948     | 0.343   |
| Year 2014                                                             | 0.034    | 0.152          | 0.225      | 0.822   |
| Year 2015                                                             | −0.204   | 0.162          | −1.263     | 0.206   |
| Year 2016                                                             | −0.103   | 0.157          | −0.659     | 0.510   |
| Year 2017                                                             | −0.107   | 0.168          | −0.633     | 0.527   |
| Year 2018                                                             | −0.246   | 0.172          | −1.429     | 0.153   |
| Year 2019                                                             | −0.323   | 0.178          | −1.812     | 0.070   |
| Sin                                                                   | −0.047   | 0.031          | −1.510     | 0.131   |
| Cos                                                                   | −0.080   | 0.050          | −1.605     | 0.108   |
| Smooth terms                                                          |          | edf            | Chi square | p-value |
| s(X, Y)                                                               |          | 2.996          | 458.094    | < 0.001 |
| s(Elevation)                                                          |          | 2.654          | 39.242     | < 0.001 |
| s(Slope)                                                              |          | 2.225          | 46.249     | < 0.001 |
| s(C110)                                                               |          | 1.043          | 80.131     | < 0.001 |
| s(C112)                                                               |          | 2.531          | 71.924     | < 0.001 |
| s(C211)                                                               |          | 1.971          | 7.464      | 0.016   |
| s(C213)                                                               |          | 1.946          | 8.695      | 0.008   |
| s(C221)                                                               |          | 2.223          | 5.833      | 0.055   |
| s(C222)                                                               |          | 0.001          | 0.001      | 0.457   |
| s(C223)                                                               |          | 0.615          | 2.097      | 0.064   |
| s(C224)                                                               |          | 0.000          | 0.000      | 0.742   |
| s(C231)                                                               |          | 0.002          | 0.000      | 0.924   |
| s(C311)                                                               |          | 2.659          | 77.273     | < 0.001 |
| s(C312)                                                               |          | 0.763          | 3.165      | 0.041   |
| s(C313)                                                               |          | 0.002          | 0.000      | 0.877   |
| s(C320)                                                               |          | 1.244          | 27.083     | 0.000   |
| s(C321)                                                               |          | 0.002          | 0.002      | 0.423   |
| s(C330)                                                               |          | 0.001          | 0.000      | 0.682   |
| s(C410)                                                               |          | 0.847          | 7.111      | 0.004   |
| s(C511)                                                               |          | 1.704          | 2.530      | 0.218   |

| Common Cuckoo ( <i>Cuculus canorus</i> ) — Model C-ZIP-GAM |          |                |            |         |
|------------------------------------------------------------|----------|----------------|------------|---------|
| Binomial component                                         |          |                |            |         |
| Parametric terms                                           | Estimate | Standard error | z-value    | p-value |
| Intercept                                                  | 4.987    | 0.317          | 15.740     | < 0.001 |
| Smooth terms                                               |          | edf            | Chi square | p-value |
| s(Elevation)                                               |          | 2.946          | 1076.000   | < 0.001 |
| s(Urb <sub>2500</sub> )                                    |          | 2.984          | 1132.000   | < 0.001 |
| s(For <sub>2500</sub> )                                    |          | 2.991          | 1636.000   | < 0.001 |
| Count component                                            |          |                |            |         |
| Parametric terms                                           | Estimate | Standard error | z-value    | p-value |
| Intercept                                                  | −0.789   | 0.075          | −10.538    | < 0.001 |
| Year 1995                                                  | −0.086   | 0.097          | −0.887     | 0.375   |
| Year 1996                                                  | −0.650   | 0.110          | −5.937     | < 0.001 |
| Year 1999                                                  | −0.198   | 0.086          | −2.308     | 0.021   |
| Year 2000                                                  | −0.344   | 0.085          | −4.042     | < 0.001 |
| Year 2001                                                  | −0.361   | 0.094          | −3.838     | < 0.001 |
| Year 2002                                                  | −0.274   | 0.099          | −2.781     | 0.005   |
| Year 2003                                                  | −0.148   | 0.101          | −1.473     | 0.141   |
| Year 2004                                                  | −0.100   | 0.114          | −0.875     | 0.382   |
| Year 2005                                                  | 0.018    | 0.087          | 0.211      | 0.833   |
| Year 2006                                                  | −0.151   | 0.090          | −1.692     | 0.091   |
| Year 2007                                                  | −0.139   | 0.094          | −1.481     | 0.139   |
| Year 2008                                                  | −0.383   | 0.100          | −3.812     | < 0.001 |
| Year 2009                                                  | −0.269   | 0.098          | −2.757     | 0.006   |
| Year 2010                                                  | −0.050   | 0.093          | −0.537     | 0.591   |
| Year 2011                                                  | −0.006   | 0.088          | −0.071     | 0.943   |
| Year 2012                                                  | −0.296   | 0.096          | −3.066     | 0.002   |
| Year 2013                                                  | −0.195   | 0.094          | −2.081     | 0.037   |
| Year 2014                                                  | 0.096    | 0.090          | 1.070      | 0.285   |
| Year 2015                                                  | 0.009    | 0.092          | 0.097      | 0.922   |
| Year 2016                                                  | −0.036   | 0.092          | −0.390     | 0.696   |
| Year 2017                                                  | −0.199   | 0.101          | −1.968     | 0.049   |
| Year 2018                                                  | −0.262   | 0.102          | −2.573     | 0.010   |
| Year 2019                                                  | −0.337   | 0.104          | −3.233     | 0.001   |
| Sin                                                        | −0.008   | 0.018          | −0.463     | 0.643   |
| Cos                                                        | 0.015    | 0.027          | 0.549      | 0.583   |
| Smooth terms                                               |          | edf            | Chi square | p-value |
| s(X, Y)                                                    |          | 2.971          | 335.601    | < 0.001 |
| s(Elevation)                                               |          | 2.643          | 32.400     | < 0.001 |
| s(Slope)                                                   |          | 2.795          | 77.192     | < 0.001 |
| s(C110)                                                    |          | 2.941          | 90.119     | < 0.001 |
| s(C112)                                                    |          | 2.885          | 16.403     | 0.001   |
| s(C211)                                                    |          | 0.001          | 0.000      | 0.571   |
| s(C213)                                                    |          | 2.365          | 31.445     | < 0.001 |
| s(C221)                                                    |          | 0.954          | 19.392     | < 0.001 |
| s(C222)                                                    |          | 0.496          | 1.006      | 0.154   |
| s(C223)                                                    |          | 0.000          | 0.000      | 0.753   |
| s(C224)                                                    |          | 2.236          | 99.193     | < 0.001 |
| s(C231)                                                    |          | 1.013          | 40.345     | < 0.001 |
| s(C311)                                                    |          | 2.887          | 119.877    | < 0.001 |
| s(C312)                                                    |          | 0.718          | 4.209      | 0.014   |
| s(C313)                                                    |          | 1.812          | 27.925     | < 0.001 |
| s(C320)                                                    |          | 0.961          | 12.854     | 0.000   |
| s(C321)                                                    |          | 2.847          | 50.306     | 0.000   |
| s(C330)                                                    |          | 2.255          | 25.863     | < 0.001 |
| s(C410)                                                    |          | 2.924          | 209.291    | < 0.001 |
| s(C511)                                                    |          | 0.940          | 14.920     | < 0.001 |

| Common Swift ( <i>Apus apus</i> ) — Model C-ZINB-GAM |          |                |            |         |
|------------------------------------------------------|----------|----------------|------------|---------|
| Binomial component                                   |          |                |            |         |
| Parametric terms                                     | Estimate | Standard error | z-value    | p-value |
| Intercept                                            | 0.831    | 0.022          | 37.700     | < 0.001 |
| Smooth terms                                         |          | edf            | Chi square | p-value |
| s(Elevation)                                         |          | 1.170          | 665.070    | < 0.001 |
| s(Urb <sub>2500</sub> )                              |          | 1.112          | 1027.400   | < 0.001 |
| s(For <sub>2500</sub> )                              |          | 2.833          | 60.010     | < 0.001 |
| Count component                                      |          |                |            |         |
| Parametric terms                                     | Estimate | Standard error | z-value    | p-value |
| Intercept                                            | 0.922    | 0.127          | 7.258      | < 0.001 |
| Year 1995                                            | −0.780   | 0.159          | −4.908     | < 0.001 |
| Year 1996                                            | −0.669   | 0.156          | −4.284     | < 0.001 |
| Year 1999                                            | −0.278   | 0.147          | −1.887     | 0.059   |
| Year 2000                                            | −0.601   | 0.142          | −4.237     | < 0.001 |
| Year 2001                                            | −0.594   | 0.148          | −4.005     | < 0.001 |
| Year 2002                                            | −0.458   | 0.162          | −2.834     | 0.005   |
| Year 2003                                            | −0.217   | 0.163          | −1.334     | 0.182   |
| Year 2004                                            | −0.335   | 0.178          | −1.884     | 0.060   |
| Year 2005                                            | −0.485   | 0.146          | −3.319     | < 0.001 |
| Year 2006                                            | −0.601   | 0.144          | −4.167     | < 0.001 |
| Year 2007                                            | −1.300   | 0.162          | −8.042     | < 0.001 |
| Year 2008                                            | −0.949   | 0.159          | −5.971     | < 0.001 |
| Year 2009                                            | −1.072   | 0.157          | −6.836     | < 0.001 |
| Year 2010                                            | −0.561   | 0.154          | −3.644     | < 0.001 |
| Year 2011                                            | −0.793   | 0.150          | −5.298     | < 0.001 |
| Year 2012                                            | −0.834   | 0.156          | −5.341     | < 0.001 |
| Year 2013                                            | −0.886   | 0.155          | −5.710     | < 0.001 |
| Year 2014                                            | −0.848   | 0.150          | −5.646     | < 0.001 |
| Year 2015                                            | −0.853   | 0.155          | −5.520     | < 0.001 |
| Year 2016                                            | −1.361   | 0.159          | −8.573     | < 0.001 |
| Year 2017                                            | −1.510   | 0.175          | −8.652     | < 0.001 |
| Year 2018                                            | −1.113   | 0.171          | −6.503     | < 0.001 |
| Year 2019                                            | −0.453   | 0.167          | −2.716     | 0.007   |
| Sin                                                  | 0.065    | 0.030          | 2.214      | 0.027   |
| Cos                                                  | −0.127   | 0.044          | −2.889     | 0.004   |
| Smooth terms                                         |          | edf            | Chi square | p-value |
| s(X, Y)                                              |          | 1.906          | 52.724     | < 0.001 |
| s(Elevation)                                         |          | 2.895          | 50.998     | < 0.001 |
| s(Slope)                                             |          | 0.411          | 0.680      | 0.194   |
| s(C110)                                              |          | 1.022          | 16.871     | 0.000   |
| s(C112)                                              |          | 0.876          | 6.340      | 0.005   |
| s(C211)                                              |          | 1.979          | 29.953     | 0.000   |
| s(C213)                                              |          | 0.903          | 7.950      | 0.002   |
| s(C221)                                              |          | 0.956          | 19.609     | 0.000   |
| s(C222)                                              |          | 0.800          | 4.087      | 0.023   |
| s(C223)                                              |          | 0.851          | 5.823      | 0.009   |
| s(C224)                                              |          | 0.905          | 9.191      | 0.001   |
| s(C231)                                              |          | 0.619          | 1.562      | 0.094   |
| s(C311)                                              |          | 2.679          | 160.801    | 0.000   |
| s(C312)                                              |          | 1.237          | 108.943    | 0.000   |
| s(C313)                                              |          | 1.269          | 147.769    | 0.000   |
| s(C320)                                              |          | 0.956          | 16.345     | 0.000   |
| s(C321)                                              |          | 0.001          | 0.000      | 0.907   |
| s(C330)                                              |          | 0.003          | 0.002      | 0.411   |
| s(C410)                                              |          | 0.002          | 0.000      | 0.755   |
| s(C511)                                              |          | 0.002          | 0.000      | 0.811   |

| European Bee-eater ( <i>Merops apiaster</i> ) — Model C-NB-GAM |          |                |         |         |
|----------------------------------------------------------------|----------|----------------|---------|---------|
| Parametric terms                                               | Estimate | Standard error | z-value | p-value |
| Intercept                                                      | −8.994   | 0.936          | −9.608  | < 0.001 |
| Year 1995                                                      | 0.906    | 0.917          | 0.989   | 0.323   |
| Year 1996                                                      | −0.162   | 1.035          | −0.157  | 0.875   |
| Year 1999                                                      | 1.951    | 0.857          | 2.276   | 0.023   |
| Year 2000                                                      | 1.608    | 0.869          | 1.851   | 0.064   |
| Year 2001                                                      | 1.745    | 0.863          | 2.022   | 0.043   |
| Year 2002                                                      | 1.867    | 0.886          | 2.108   | 0.035   |
| Year 2003                                                      | 2.746    | 0.864          | 3.178   | 0.001   |
| Year 2004                                                      | 1.430    | 0.996          | 1.437   | 0.151   |
| Year 2005                                                      | 2.495    | 0.843          | 2.959   | 0.003   |
| Year 2006                                                      | 0.904    | 0.895          | 1.009   | 0.313   |
| Year 2007                                                      | 2.532    | 0.860          | 2.944   | 0.003   |
| Year 2008                                                      | 2.023    | 0.886          | 2.283   | 0.022   |
| Year 2009                                                      | 1.956    | 0.877          | 2.229   | 0.026   |
| Year 2010                                                      | 3.261    | 0.850          | 3.838   | < 0.001 |
| Year 2011                                                      | 2.418    | 0.857          | 2.821   | 0.005   |
| Year 2012                                                      | 2.152    | 0.870          | 2.474   | 0.013   |
| Year 2013                                                      | 2.944    | 0.849          | 3.467   | < 0.001 |
| Year 2014                                                      | 2.853    | 0.855          | 3.338   | < 0.001 |
| Year 2015                                                      | 2.744    | 0.860          | 3.192   | 0.001   |
| Year 2016                                                      | 2.826    | 0.855          | 3.306   | < 0.001 |
| Year 2017                                                      | 2.987    | 0.867          | 3.444   | < 0.001 |
| Year 2018                                                      | 3.262    | 0.865          | 3.771   | < 0.001 |
| Year 2019                                                      | 3.177    | 0.865          | 3.675   | < 0.001 |
| Sin                                                            | −0.208   | 0.093          | −2.246  | 0.025   |
| Cos                                                            | 0.140    | 0.138          | 1.014   | 0.311   |
| Smooth terms                                                   | edf      | Chi square     | p-value |         |
| s(X,Y)                                                         | 1.999    | 125.125        | < 0.001 |         |
| s(Elevation)                                                   | 1.161    | 48.712         | < 0.001 |         |
| s(Slope)                                                       | 2.311    | 22.706         | < 0.001 |         |
| s(C110)                                                        | 2.144    | 18.500         | < 0.001 |         |
| s(C112)                                                        | 0.956    | 13.830         | < 0.001 |         |
| s(C211)                                                        | 0.003    | 0.002          | 0.394   |         |
| s(C213)                                                        | 1.017    | 37.487         | < 0.001 |         |
| s(C221)                                                        | 0.855    | 5.454          | 0.011   |         |
| s(C222)                                                        | 0.740    | 2.881          | 0.048   |         |
| s(C223)                                                        | 0.000    | 0.000          | 0.558   |         |
| s(C224)                                                        | 0.158    | 0.169          | 0.301   |         |
| s(C231)                                                        | 0.046    | 0.042          | 0.336   |         |
| s(C311)                                                        | 2.604    | 22.156         | < 0.001 |         |
| s(C312)                                                        | 0.001    | 0.001          | 0.470   |         |
| s(C313)                                                        | 0.000    | 0.000          | 0.580   |         |
| s(C320)                                                        | 0.000    | 0.000          | 0.490   |         |
| s(C321)                                                        | 0.000    | 0.000          | 0.585   |         |
| s(C330)                                                        | 0.939    | 12.666         | < 0.001 |         |
| s(C410)                                                        | 0.000    | 0.000          | 0.373   |         |
| s(C511)                                                        | 0.931    | 12.223         | < 0.001 |         |



| Eurasian Wryneck ( <i>Jynx torquilla</i> ) — Model C-ZIP-GAM |          |                |            |         |
|--------------------------------------------------------------|----------|----------------|------------|---------|
| Binomial component                                           |          |                |            |         |
| Parametric terms                                             | Estimate | Standard error | z-value    | p-value |
| Intercept                                                    | −2.106   | 0.035          | −60.520    | < 0.001 |
| Smooth terms                                                 |          | edf            | Chi square | p-value |
| s(Elevation)                                                 |          | 2.994          | 818.020    | < 0.001 |
| s(Urb <sub>2500</sub> )                                      |          | 2.979          | 72.450     | < 0.001 |
| s(For <sub>2500</sub> )                                      |          | 2.974          | 332.040    | < 0.001 |
| Count component                                              |          |                |            |         |
| Parametric terms                                             | Estimate | Standard error | z-value    | p-value |
| Intercept                                                    | −2.928   | 0.723          | −4.052     | < 0.001 |
| Year 1995                                                    | 0.072    | 0.298          | 0.242      | 0.809   |
| Year 1996                                                    | −0.347   | 0.344          | −1.008     | 0.313   |
| Year 1999                                                    | 0.310    | 0.286          | 1.081      | 0.280   |
| Year 2000                                                    | 0.146    | 0.267          | 0.545      | 0.586   |
| Year 2001                                                    | −0.044   | 0.299          | −0.147     | 0.883   |
| Year 2002                                                    | 0.208    | 0.332          | 0.626      | 0.532   |
| Year 2003                                                    | 0.271    | 0.349          | 0.776      | 0.438   |
| Year 2004                                                    | 0.120    | 0.411          | 0.293      | 0.770   |
| Year 2005                                                    | −0.309   | 0.302          | −1.023     | 0.306   |
| Year 2006                                                    | −0.898   | 0.350          | −2.561     | 0.010   |
| Year 2007                                                    | 0.298    | 0.285          | 1.045      | 0.296   |
| Year 2008                                                    | −0.060   | 0.302          | −0.197     | 0.844   |
| Year 2009                                                    | −0.384   | 0.349          | −1.100     | 0.271   |
| Year 2010                                                    | −0.414   | 0.319          | −1.299     | 0.194   |
| Year 2011                                                    | −0.837   | 0.349          | −2.399     | 0.016   |
| Year 2012                                                    | −0.691   | 0.364          | −1.898     | 0.058   |
| Year 2013                                                    | −0.392   | 0.339          | −1.159     | 0.246   |
| Year 2014                                                    | −0.605   | 0.357          | −1.693     | 0.090   |
| Year 2015                                                    | −1.011   | 0.395          | −2.561     | 0.010   |
| Year 2016                                                    | −1.660   | 0.505          | −3.287     | 0.001   |
| Year 2017                                                    | −1.167   | 0.471          | −2.477     | 0.013   |
| Year 2018                                                    | −1.562   | 0.552          | −2.828     | 0.005   |
| Year 2019                                                    | −1.681   | 0.552          | −3.043     | 0.002   |
| Sin                                                          | −0.145   | 0.071          | −2.029     | 0.042   |
| Cos                                                          | −0.092   | 0.108          | −0.855     | 0.393   |
| Smooth terms                                                 |          | edf            | Chi square | p-value |
| s(X, Y)                                                      |          | 2.956          | 111.980    | < 0.001 |
| s(Elevation)                                                 |          | 0.000          | 0.000      | 0.536   |
| S(Slope)                                                     |          | 0.928          | 7.061      | 0.004   |
| s(C110)                                                      |          | 0.049          | 0.055      | 0.284   |
| s(C112)                                                      |          | 2.681          | 4.330      | 0.182   |
| s(C211)                                                      |          | 0.000          | 0.000      | 0.746   |
| s(C213)                                                      |          | 0.734          | 2.549      | 0.062   |
| s(C221)                                                      |          | 2.680          | 98.820     | < 0.001 |
| s(C222)                                                      |          | 0.842          | 5.123      | 0.013   |
| s(C223)                                                      |          | 0.889          | 8.045      | 0.003   |
| s(C224)                                                      |          | 2.567          | 15.429     | < 0.001 |
| s(C231)                                                      |          | 1.527          | 40.971     | < 0.001 |
| s(C311)                                                      |          | 2.446          | 51.158     | < 0.001 |
| s(C312)                                                      |          | 0.330          | 0.499      | 0.217   |
| s(C313)                                                      |          | 0.000          | 0.000      | 0.803   |
| s(C320)                                                      |          | 0.674          | 2.167      | 0.072   |
| s(C321)                                                      |          | 1.787          | 6.650      | 0.024   |
| s(C330)                                                      |          | 0.750          | 3.748      | 0.025   |
| s(C410)                                                      |          | 0.001          | 0.001      | 0.411   |
| s(C511)                                                      |          | 0.906          | 19.469     | < 0.001 |

| European Green Woodpecker ( <i>Picus viridis</i> ) — Model C-P-GAM |          |                |            |         |
|--------------------------------------------------------------------|----------|----------------|------------|---------|
| Parametric terms                                                   | Estimate | Standard error | z-value    | p-value |
| Intercept                                                          | −4.031   | 0.293          | −13.736    | < 0.001 |
| Year 1995                                                          | −0.622   | 0.429          | −1.450     | 0.147   |
| Year 1996                                                          | −0.097   | 0.378          | −0.258     | 0.797   |
| Year 1999                                                          | 0.349    | 0.318          | 1.097      | 0.273   |
| Year 2000                                                          | 0.943    | 0.304          | 3.100      | 0.002   |
| Year 2001                                                          | 0.903    | 0.316          | 2.859      | 0.004   |
| Year 2002                                                          | 0.673    | 0.332          | 2.028      | 0.043   |
| Year 2003                                                          | 0.822    | 0.338          | 2.429      | 0.015   |
| Year 2004                                                          | −0.015   | 0.442          | −0.034     | 0.973   |
| Year 2005                                                          | 0.583    | 0.323          | 1.807      | 0.071   |
| Year 2006                                                          | 0.804    | 0.312          | 2.575      | 0.010   |
| Year 2007                                                          | 0.785    | 0.326          | 2.410      | 0.016   |
| Year 2008                                                          | 0.738    | 0.335          | 2.202      | 0.028   |
| Year 2009                                                          | 0.571    | 0.339          | 1.684      | 0.092   |
| Year 2010                                                          | 0.662    | 0.332          | 1.995      | 0.046   |
| Year 2011                                                          | 1.253    | 0.308          | 4.062      | < 0.001 |
| Year 2012                                                          | 1.117    | 0.318          | 3.517      | < 0.001 |
| Year 2013                                                          | 1.168    | 0.315          | 3.715      | < 0.001 |
| Year 2014                                                          | 1.109    | 0.316          | 3.510      | < 0.001 |
| Year 2015                                                          | 1.324    | 0.313          | 4.227      | < 0.001 |
| Year 2016                                                          | 1.161    | 0.316          | 3.671      | < 0.001 |
| Year 2017                                                          | 1.201    | 0.323          | 3.721      | < 0.001 |
| Year 2018                                                          | 0.991    | 0.330          | 3.005      | 0.003   |
| Year 2019                                                          | 1.255    | 0.321          | 3.902      | 0.000   |
| Sin                                                                | −0.018   | 0.043          | −0.418     | 0.676   |
| Cos                                                                | 0.057    | 0.066          | 0.858      | 0.391   |
| Smooth terms                                                       | edf      |                | Chi square | p-value |
| s(X,Y)                                                             | 2.973    |                | 137.189    | < 0.001 |
| s(Elevation)                                                       | 2.942    |                | 72.707     | < 0.001 |
| s(Slope)                                                           | 2.840    |                | 16.272     | < 0.001 |
| s(C110)                                                            | 0.931    |                | 7.285      | 0.003   |
| s(C112)                                                            | 0.846    |                | 4.172      | 0.022   |
| s(C211)                                                            | 2.260    |                | 15.935     | < 0.001 |
| s(C213)                                                            | 0.909    |                | 8.216      | 0.002   |
| s(C221)                                                            | 1.485    |                | 24.963     | < 0.001 |
| s(C222)                                                            | 0.000    |                | 0.000      | 0.665   |
| s(C223)                                                            | 0.533    |                | 0.860      | 0.203   |
| s(C224)                                                            | 2.632    |                | 29.737     | < 0.001 |
| s(C231)                                                            | 2.471    |                | 14.594     | < 0.001 |
| s(C311)                                                            | 2.741    |                | 70.003     | < 0.001 |
| s(C312)                                                            | 0.907    |                | 18.311     | < 0.001 |
| s(C313)                                                            | 2.043    |                | 25.906     | < 0.001 |
| s(C320)                                                            | 0.000    |                | 0.000      | 0.670   |
| s(C321)                                                            | 1.649    |                | 6.263      | 0.021   |
| s(C330)                                                            | 0.000    |                | 0.000      | 0.764   |
| s(C410)                                                            | 0.507    |                | 0.792      | 0.208   |
| s(C511)                                                            | 2.758    |                | 5.791      | 0.095   |

| <b>Great Spotted Woodpecker (<i>Dendrocopos major</i>) — Model C-P-GAM</b> |                 |                       |                   |                |
|----------------------------------------------------------------------------|-----------------|-----------------------|-------------------|----------------|
| <b>Parametric terms</b>                                                    | <b>Estimate</b> | <b>Standard error</b> | <b>z-value</b>    | <b>p-value</b> |
| Intercept                                                                  | −3.562          | 0.245                 | −14.544           | < 0.001        |
| Year 1995                                                                  | −0.514          | 0.338                 | −1.518            | 0.129          |
| Year 1996                                                                  | −0.714          | 0.361                 | −1.977            | 0.048          |
| Year 1999                                                                  | 0.768           | 0.256                 | 2.993             | 0.003          |
| Year 2000                                                                  | 0.481           | 0.260                 | 1.847             | 0.065          |
| Year 2001                                                                  | 0.630           | 0.268                 | 2.351             | 0.019          |
| Year 2002                                                                  | 0.767           | 0.277                 | 2.766             | 0.006          |
| Year 2003                                                                  | 1.032           | 0.273                 | 3.788             | < 0.001        |
| Year 2004                                                                  | 0.724           | 0.308                 | 2.350             | 0.019          |
| Year 2005                                                                  | 0.967           | 0.262                 | 3.695             | < 0.001        |
| Year 2006                                                                  | 1.155           | 0.255                 | 4.531             | < 0.001        |
| Year 2007                                                                  | 1.195           | 0.265                 | 4.519             | < 0.001        |
| Year 2008                                                                  | 1.035           | 0.270                 | 3.827             | < 0.001        |
| Year 2009                                                                  | 0.880           | 0.273                 | 3.227             | 0.001          |
| Year 2010                                                                  | 1.196           | 0.264                 | 4.525             | < 0.001        |
| Year 2011                                                                  | 1.465           | 0.256                 | 5.715             | < 0.001        |
| Year 2012                                                                  | 1.369           | 0.262                 | 5.227             | < 0.001        |
| Year 2013                                                                  | 1.535           | 0.258                 | 5.943             | < 0.001        |
| Year 2014                                                                  | 1.584           | 0.257                 | 6.163             | < 0.001        |
| Year 2015                                                                  | 1.405           | 0.261                 | 5.380             | < 0.001        |
| Year 2016                                                                  | 1.567           | 0.259                 | 6.055             | < 0.001        |
| Year 2017                                                                  | 1.623           | 0.261                 | 6.213             | < 0.001        |
| Year 2018                                                                  | 1.201           | 0.270                 | 4.443             | < 0.001        |
| Year 2019                                                                  | 1.631           | 0.261                 | 6.240             | < 0.001        |
| Sin                                                                        | −0.025          | 0.032                 | −0.773            | 0.440          |
| Cos                                                                        | 0.055           | 0.048                 | 1.147             | 0.251          |
| <b>Smooth terms</b>                                                        | <b>edf</b>      |                       | <b>Chi square</b> | <b>p-value</b> |
| s(X, Y)                                                                    | 2.984           |                       | 116.397           | < 0.001        |
| s(Elevation)                                                               | 2.976           |                       | 124.603           | < 0.001        |
| s(Slope)                                                                   | 0.975           |                       | 17.158            | < 0.001        |
| s(C110)                                                                    | 2.162           |                       | 18.054            | < 0.001        |
| s(C112)                                                                    | 1.721           |                       | 10.527            | 0.001          |
| s(C211)                                                                    | 2.118           |                       | 11.104            | 0.001          |
| s(C213)                                                                    | 0.931           |                       | 25.415            | < 0.001        |
| s(C221)                                                                    | 1.302           |                       | 0.432             | 0.667          |
| s(C222)                                                                    | 0.000           |                       | 0.000             | 0.357          |
| s(C223)                                                                    | 0.844           |                       | 4.641             | 0.019          |
| s(C224)                                                                    | 1.849           |                       | 61.231            | < 0.001        |
| s(C231)                                                                    | 0.762           |                       | 5.004             | 0.006          |
| s(C311)                                                                    | 2.924           |                       | 192.659           | < 0.001        |
| s(C312)                                                                    | 1.044           |                       | 63.092            | < 0.001        |
| s(C313)                                                                    | 2.439           |                       | 141.736           | < 0.001        |
| s(C320)                                                                    | 0.642           |                       | 1.448             | 0.122          |
| s(C321)                                                                    | 0.869           |                       | 9.923             | < 0.001        |
| s(C330)                                                                    | 0.772           |                       | 4.357             | 0.016          |
| s(C410)                                                                    | 0.000           |                       | 0.000             | 0.901          |
| s(C511)                                                                    | 0.000           |                       | 0.000             | 0.541          |

| Eurasian Skylark ( <i>Alauda arvensis</i> ) — Model C-ZIP-GAM |          |                |            |         |
|---------------------------------------------------------------|----------|----------------|------------|---------|
| Binomial component                                            |          |                |            |         |
| Parametric terms                                              | Estimate | Standard error | z-value    | p-value |
| Intercept                                                     | 0.168    | 0.018          | 9.125      | < 0.001 |
| Smooth terms                                                  |          | edf            | Chi square | p-value |
| s(Elevation)                                                  |          | 2.991          | 618.800    | < 0.001 |
| s(Urb <sub>2500</sub> )                                       |          | 1.121          | 295.900    | < 0.001 |
| s(For <sub>2500</sub> )                                       |          | 2.110          | 193.900    | < 0.001 |
| Count component                                               |          |                |            |         |
| Parametric terms                                              | Estimate | Standard error | z-value    | p-value |
| Intercept                                                     | -1.124   | 0.107          | -10.466    | < 0.001 |
| Year 1995                                                     | -0.645   | 0.085          | -7.623     | < 0.001 |
| Year 1996                                                     | -0.861   | 0.084          | -10.286    | < 0.001 |
| Year 1999                                                     | -0.661   | 0.094          | -7.067     | < 0.001 |
| Year 2000                                                     | -0.748   | 0.082          | -9.161     | < 0.001 |
| Year 2001                                                     | -0.919   | 0.084          | -10.953    | < 0.001 |
| Year 2002                                                     | -0.939   | 0.101          | -9.250     | < 0.001 |
| Year 2003                                                     | -1.083   | 0.103          | -10.488    | < 0.001 |
| Year 2004                                                     | -1.391   | 0.127          | -10.973    | < 0.001 |
| Year 2005                                                     | -1.163   | 0.082          | -14.132    | < 0.001 |
| Year 2006                                                     | -1.349   | 0.093          | -14.544    | < 0.001 |
| Year 2007                                                     | -1.777   | 0.113          | -15.709    | < 0.001 |
| Year 2008                                                     | -1.767   | 0.121          | -14.652    | < 0.001 |
| Year 2009                                                     | -1.676   | 0.108          | -15.491    | < 0.001 |
| Year 2010                                                     | -1.836   | 0.122          | -15.035    | < 0.001 |
| Year 2011                                                     | -2.245   | 0.134          | -16.783    | < 0.001 |
| Year 2012                                                     | -2.199   | 0.128          | -17.136    | < 0.001 |
| Year 2013                                                     | -2.506   | 0.147          | -17.029    | < 0.001 |
| Year 2014                                                     | -2.463   | 0.152          | -16.191    | < 0.001 |
| Year 2015                                                     | -2.564   | 0.154          | -16.608    | < 0.001 |
| Year 2016                                                     | -2.146   | 0.130          | -16.560    | < 0.001 |
| Year 2017                                                     | -2.586   | 0.181          | -14.321    | < 0.001 |
| Year 2018                                                     | -2.280   | 0.161          | -14.195    | < 0.001 |
| Year 2019                                                     | -2.513   | 0.176          | -14.259    | < 0.001 |
| Sin                                                           | 0.020    | 0.026          | 0.793      | 0.428   |
| Cos                                                           | 0.040    | 0.038          | 1.063      | 0.288   |
| Smooth terms                                                  |          | edf            | Chi square | p-value |
| s(X, Y)                                                       |          | 2.979          | 267.814    | < 0.001 |
| s(Elevation)                                                  |          | 2.940          | 183.753    | < 0.001 |
| S(Slope)                                                      |          | 2.553          | 170.265    | < 0.001 |
| s(C110)                                                       |          | 1.048          | 81.880     | < 0.001 |
| s(C112)                                                       |          | 2.736          | 50.882     | < 0.001 |
| s(C211)                                                       |          | 2.742          | 62.335     | < 0.001 |
| s(C213)                                                       |          | 1.671          | 31.182     | < 0.001 |
| s(C221)                                                       |          | 1.955          | 6.344      | 0.029   |
| s(C222)                                                       |          | 0.001          | 0.000      | 0.871   |
| s(C223)                                                       |          | 0.878          | 5.259      | 0.014   |
| s(C224)                                                       |          | 2.638          | 40.149     | < 0.001 |
| s(C231)                                                       |          | 0.992          | 44.294     | < 0.001 |
| s(C311)                                                       |          | 1.849          | 117.667    | < 0.001 |
| s(C312)                                                       |          | 2.820          | 54.836     | < 0.001 |
| s(C313)                                                       |          | 2.941          | 32.039     | < 0.001 |
| s(C320)                                                       |          | 1.635          | 42.053     | < 0.001 |
| s(C321)                                                       |          | 2.641          | 104.323    | < 0.001 |
| s(C330)                                                       |          | 2.376          | 59.652     | < 0.001 |
| s(C410)                                                       |          | 0.884          | 8.908      | 0.001   |
| s(C511)                                                       |          | 0.246          | 0.389      | 0.201   |

| <b>Eurasian Crag Martin (<i>Ptyonoprogne rupestris</i>) — Model C-NB-GAM</b> |                 |                       |                |                |
|------------------------------------------------------------------------------|-----------------|-----------------------|----------------|----------------|
| <b>Parametric terms</b>                                                      | <b>Estimate</b> | <b>Standard error</b> | <b>z-value</b> | <b>p-value</b> |
| Intercept                                                                    | −7.042          | 4.740                 | −1.486         | 0.137          |
| Year 1995                                                                    | 0.577           | 0.576                 | 1.001          | 0.317          |
| Year 1996                                                                    | 0.237           | 0.595                 | 0.397          | 0.691          |
| Year 1999                                                                    | 0.350           | 0.548                 | 0.639          | 0.523          |
| Year 2000                                                                    | 0.047           | 0.548                 | 0.085          | 0.932          |
| Year 2001                                                                    | 0.983           | 0.547                 | 1.797          | 0.072          |
| Year 2002                                                                    | 0.384           | 0.624                 | 0.616          | 0.538          |
| Year 2003                                                                    | 0.561           | 0.580                 | 0.967          | 0.334          |
| Year 2004                                                                    | 0.041           | 0.653                 | 0.062          | 0.950          |
| Year 2005                                                                    | −0.187          | 0.579                 | −0.323         | 0.747          |
| Year 2006                                                                    | 0.237           | 0.566                 | 0.419          | 0.675          |
| Year 2007                                                                    | −0.628          | 0.664                 | −0.946         | 0.344          |
| Year 2008                                                                    | −0.006          | 0.623                 | −0.009         | 0.993          |
| Year 2009                                                                    | 0.102           | 0.612                 | 0.167          | 0.867          |
| Year 2010                                                                    | 0.490           | 0.582                 | 0.841          | 0.401          |
| Year 2011                                                                    | 0.650           | 0.557                 | 1.167          | 0.243          |
| Year 2012                                                                    | 0.092           | 0.584                 | 0.157          | 0.875          |
| Year 2013                                                                    | 0.906           | 0.554                 | 1.637          | 0.102          |
| Year 2014                                                                    | 0.456           | 0.566                 | 0.806          | 0.420          |
| Year 2015                                                                    | 0.895           | 0.548                 | 1.634          | 0.102          |
| Year 2016                                                                    | 0.895           | 0.553                 | 1.619          | 0.105          |
| Year 2017                                                                    | 0.474           | 0.606                 | 0.782          | 0.434          |
| Year 2018                                                                    | 0.268           | 0.618                 | 0.433          | 0.665          |
| Year 2019                                                                    | 0.841           | 0.580                 | 1.449          | 0.147          |
| Sin                                                                          | −0.062          | 0.083                 | −0.746         | 0.455          |
| Cos                                                                          | −0.264          | 0.124                 | −2.132         | 0.033          |
| <b>Smooth terms</b>                                                          | <b>edf</b>      | <b>Chi square</b>     | <b>p-value</b> |                |
| s(X, Y)                                                                      | 1.993           | 153.522               | < 0.001        |                |
| s(Elevation)                                                                 | 2.600           | 94.491                | < 0.001        |                |
| s(Slope)                                                                     | 2.778           | 68.499                | < 0.001        |                |
| s(C110)                                                                      | 1.881           | 4.913                 | 0.055          |                |
| s(C112)                                                                      | 2.191           | 19.357                | < 0.001        |                |
| s(C211)                                                                      | 1.119           | 19.901                | < 0.001        |                |
| s(C213)                                                                      | 0.717           | 0.048                 | 0.795          |                |
| s(C221)                                                                      | 0.847           | 4.982                 | 0.015          |                |
| s(C222)                                                                      | 0.897           | 6.973                 | 0.005          |                |
| s(C223)                                                                      | 0.872           | 4.835                 | 0.018          |                |
| s(C224)                                                                      | 0.000           | 0.000                 | 0.920          |                |
| s(C231)                                                                      | 1.109           | 21.828                | < 0.001        |                |
| s(C311)                                                                      | 2.174           | 64.035                | < 0.001        |                |
| s(C312)                                                                      | 2.057           | 41.727                | < 0.001        |                |
| s(C313)                                                                      | 1.453           | 52.537                | < 0.001        |                |
| s(C320)                                                                      | 0.939           | 11.846                | < 0.001        |                |
| s(C321)                                                                      | 0.967           | 14.382                | < 0.001        |                |
| s(C330)                                                                      | 0.337           | 0.451                 | 0.235          |                |
| s(C410)                                                                      | 0.001           | 0.001                 | 0.361          |                |
| s(C511)                                                                      | 0.877           | 6.802                 | 0.005          |                |

| <b>Barn Swallow (<i>Hirundo rustica</i>) — Model C-ZINB-GAM</b> |                 |                       |                   |                |
|-----------------------------------------------------------------|-----------------|-----------------------|-------------------|----------------|
| <b>Binomial component</b>                                       |                 |                       |                   |                |
| <b>Parametric terms</b>                                         | <b>Estimate</b> | <b>Standard error</b> | <b>z-value</b>    | <b>p-value</b> |
| Intercept                                                       | 2.130           | 0.043                 | 50.000            | < 0.001        |
| <b>Smooth terms</b>                                             |                 | <b>edf</b>            | <b>Chi square</b> | <b>p-value</b> |
| s(Elevation)                                                    |                 | 1.248                 | 1648.500          | < 0.001        |
| s(Urb <sub>2500</sub> )                                         |                 | 2.925                 | 697.400           | < 0.001        |
| s(For <sub>2500</sub> )                                         |                 | 2.991                 | 1062.300          | < 0.001        |
| <b>Count component</b>                                          |                 |                       |                   |                |
| <b>Parametric terms</b>                                         | <b>Estimate</b> | <b>Standard error</b> | <b>z-value</b>    | <b>p-value</b> |
| Intercept                                                       | -0.224          | 0.097                 | -2.315            | 0.021          |
| Year 1995                                                       | -0.432          | 0.101                 | -4.271            | < 0.001        |
| Year 1996                                                       | -0.245          | 0.098                 | -2.492            | 0.013          |
| Year 1999                                                       | -0.074          | 0.097                 | -0.764            | 0.445          |
| Year 2000                                                       | -0.158          | 0.092                 | -1.710            | 0.087          |
| Year 2001                                                       | -0.366          | 0.095                 | -3.844            | < 0.001        |
| Year 2002                                                       | -0.294          | 0.107                 | -2.738            | 0.006          |
| Year 2003                                                       | -0.556          | 0.110                 | -5.051            | < 0.001        |
| Year 2004                                                       | -0.656          | 0.127                 | -5.182            | < 0.001        |
| Year 2005                                                       | -0.697          | 0.095                 | -7.325            | < 0.001        |
| Year 2006                                                       | -0.567          | 0.095                 | -5.969            | < 0.001        |
| Year 2007                                                       | -0.838          | 0.104                 | -8.031            | < 0.001        |
| Year 2008                                                       | -1.053          | 0.108                 | -9.788            | < 0.001        |
| Year 2009                                                       | -1.040          | 0.104                 | -9.989            | < 0.001        |
| Year 2010                                                       | -0.595          | 0.101                 | -5.882            | < 0.001        |
| Year 2011                                                       | -0.998          | 0.101                 | -9.889            | < 0.001        |
| Year 2012                                                       | -1.343          | 0.108                 | -12.394           | < 0.001        |
| Year 2013                                                       | -0.910          | 0.103                 | -8.871            | < 0.001        |
| Year 2014                                                       | -1.155          | 0.104                 | -11.140           | < 0.001        |
| Year 2015                                                       | -1.169          | 0.105                 | -11.130           | < 0.001        |
| Year 2016                                                       | -0.765          | 0.103                 | -7.452            | < 0.001        |
| Year 2017                                                       | -1.153          | 0.117                 | -9.844            | < 0.001        |
| Year 2018                                                       | -0.858          | 0.113                 | -7.593            | < 0.001        |
| Year 2019                                                       | -0.908          | 0.114                 | -8.003            | < 0.001        |
| Sin                                                             | 0.052           | 0.021                 | 2.532             | 0.011          |
| Cos                                                             | -0.172          | 0.031                 | -5.485            | < 0.001        |
| <b>Smooth terms</b>                                             |                 | <b>edf</b>            | <b>Chi square</b> | <b>p-value</b> |
| s(X, Y)                                                         |                 | 1.951                 | 63.796            | < 0.001        |
| s(Elevation)                                                    |                 | 2.887                 | 94.594            | < 0.001        |
| S(Slope)                                                        |                 | 1.292                 | 32.069            | < 0.001        |
| s(C110)                                                         |                 | 2.466                 | 140.681           | < 0.001        |
| s(C112)                                                         |                 | 2.873                 | 109.102           | < 0.001        |
| s(C211)                                                         |                 | 1.308                 | 33.685            | < 0.001        |
| s(C213)                                                         |                 | 1.020                 | 35.423            | < 0.001        |
| s(C221)                                                         |                 | 0.984                 | 37.342            | < 0.001        |
| s(C222)                                                         |                 | 0.039                 | 0.037             | 0.330          |
| s(C223)                                                         |                 | 0.337                 | 0.463             | 0.240          |
| s(C224)                                                         |                 | 1.016                 | 72.137            | < 0.001        |
| s(C231)                                                         |                 | 0.301                 | 0.405             | 0.223          |
| s(C311)                                                         |                 | 2.538                 | 463.975           | < 0.001        |
| s(C312)                                                         |                 | 2.700                 | 62.920            | < 0.001        |
| s(C313)                                                         |                 | 1.508                 | 215.796           | < 0.001        |
| s(C320)                                                         |                 | 1.012                 | 48.342            | < 0.001        |
| s(C321)                                                         |                 | 0.916                 | 9.275             | 0.001          |
| s(C330)                                                         |                 | 0.864                 | 6.274             | 0.007          |
| s(C410)                                                         |                 | 0.007                 | 0.005             | 0.411          |
| s(C511)                                                         |                 | 0.694                 | 2.240             | 0.068          |

| Common House Martin ( <i>Delichon urbicum</i> ) — Model C-ZINB-GAM |          |                |            |         |
|--------------------------------------------------------------------|----------|----------------|------------|---------|
| Binomial component                                                 |          |                |            |         |
| Parametric terms                                                   | Estimate | Standard error | z-value    | p-value |
| Intercept                                                          | 0.136    | 0.018          | 7.698      | < 0.001 |
| Smooth terms                                                       |          | edf            | Chi square | p-value |
| s(Elevation)                                                       |          | 1.183          | 776.100    | < 0.001 |
| s(Urb <sub>2500</sub> )                                            |          | 2.812          | 1310.600   | < 0.001 |
| s(For <sub>2500</sub> )                                            |          | 2.977          | 1117.300   | < 0.001 |
| Count component                                                    |          |                |            |         |
| Parametric terms                                                   | Estimate | Standard error | z-value    | p-value |
| Intercept                                                          | −0.209   | 0.160          | −1.311     | 0.190   |
| Year 1995                                                          | −0.734   | 0.203          | −3.619     | < 0.001 |
| Year 1996                                                          | −0.091   | 0.192          | −0.476     | 0.634   |
| Year 1999                                                          | 0.014    | 0.183          | 0.078      | 0.938   |
| Year 2000                                                          | 0.040    | 0.175          | 0.229      | 0.819   |
| Year 2001                                                          | −0.042   | 0.184          | −0.226     | 0.821   |
| Year 2002                                                          | −0.042   | 0.202          | −0.209     | 0.834   |
| Year 2003                                                          | −0.079   | 0.202          | −0.391     | 0.696   |
| Year 2004                                                          | −0.567   | 0.230          | −2.468     | 0.014   |
| Year 2005                                                          | −0.553   | 0.185          | −2.981     | 0.003   |
| Year 2006                                                          | −0.210   | 0.179          | −1.174     | 0.240   |
| Year 2007                                                          | −0.405   | 0.195          | −2.077     | 0.038   |
| Year 2008                                                          | −0.494   | 0.196          | −2.516     | 0.012   |
| Year 2009                                                          | −0.827   | 0.198          | −4.179     | 0.000   |
| Year 2010                                                          | −0.117   | 0.191          | −0.611     | 0.541   |
| Year 2011                                                          | −0.469   | 0.186          | −2.522     | 0.012   |
| Year 2012                                                          | −0.598   | 0.194          | −3.084     | 0.002   |
| Year 2013                                                          | −0.733   | 0.194          | −3.773     | < 0.001 |
| Year 2014                                                          | −0.819   | 0.189          | −4.342     | < 0.001 |
| Year 2015                                                          | −0.840   | 0.193          | −4.350     | < 0.001 |
| Year 2016                                                          | −0.813   | 0.195          | −4.164     | < 0.001 |
| Year 2017                                                          | −1.016   | 0.216          | −4.708     | < 0.001 |
| Year 2018                                                          | −0.865   | 0.212          | −4.073     | < 0.001 |
| Year 2019                                                          | −0.433   | 0.205          | −2.110     | 0.035   |
| Sin                                                                | 0.124    | 0.036          | 3.460      | 0.001   |
| Cos                                                                | −0.097   | 0.054          | −1.805     | 0.071   |
| Smooth terms                                                       |          | edf            | Chi square | p-value |
| s(X, Y)                                                            |          | 1.861          | 38.888     | < 0.001 |
| s(Elevation)                                                       |          | 0.006          | 0.004      | 0.384   |
| s(Slope)                                                           |          | 0.714          | 2.206      | 0.072   |
| s(C110)                                                            |          | 2.675          | 43.802     | < 0.001 |
| s(C112)                                                            |          | 1.059          | 52.284     | < 0.001 |
| s(C211)                                                            |          | 1.131          | 22.634     | < 0.001 |
| s(C213)                                                            |          | 0.402          | 0.603      | 0.215   |
| s(C221)                                                            |          | 0.420          | 0.634      | 0.216   |
| s(C222)                                                            |          | 0.002          | 0.001      | 0.409   |
| s(C223)                                                            |          | 0.001          | 0.000      | 0.751   |
| s(C224)                                                            |          | 0.902          | 8.998      | 0.001   |
| s(C231)                                                            |          | 0.001          | 0.000      | 0.478   |
| s(C311)                                                            |          | 2.327          | 194.343    | < 0.001 |
| s(C312)                                                            |          | 1.132          | 78.190     | < 0.001 |
| s(C313)                                                            |          | 1.069          | 56.371     | < 0.001 |
| s(C320)                                                            |          | 0.000          | 0.000      | 0.670   |
| s(C321)                                                            |          | 0.889          | 7.069      | 0.004   |
| s(C330)                                                            |          | 0.846          | 5.084      | 0.014   |
| s(C410)                                                            |          | 0.002          | 0.000      | 0.646   |
| s(C511)                                                            |          | 0.698          | 2.184      | 0.075   |

| Tree Pipit ( <i>Anthus trivialis</i> ) — Model C-ZIP-GAM |          |                |            |         |
|----------------------------------------------------------|----------|----------------|------------|---------|
| Binomial component                                       |          |                |            |         |
| Parametric terms                                         | Estimate | Standard error | z-value    | p-value |
| Intercept                                                | −2.504   | 0.041          | −61.520    | < 0.001 |
| Smooth terms                                             |          | edf            | Chi square | p-value |
| s(Elevation)                                             |          | 2.999          | 2002.800   | < 0.001 |
| s(Urb <sub>2500</sub> )                                  |          | 2.935          | 169.500    | < 0.001 |
| s(For <sub>2500</sub> )                                  |          | 2.930          | 1322.400   | < 0.001 |
| Count component                                          |          |                |            |         |
| Parametric terms                                         | Estimate | Standard error | z-value    | p-value |
| Intercept                                                | −4.531   | 0.601          | −7.537     | < 0.001 |
| Year 1995                                                | −0.954   | 0.392          | −2.433     | 0.015   |
| Year 1996                                                | −0.717   | 0.351          | −2.042     | 0.041   |
| Year 1999                                                | −0.417   | 0.294          | −1.422     | 0.155   |
| Year 2000                                                | −0.480   | 0.286          | −1.676     | 0.094   |
| Year 2001                                                | −0.590   | 0.301          | −1.962     | 0.050   |
| Year 2002                                                | −0.446   | 0.308          | −1.448     | 0.148   |
| Year 2003                                                | −0.560   | 0.305          | −1.833     | 0.067   |
| Year 2004                                                | −0.464   | 0.312          | −1.491     | 0.136   |
| Year 2005                                                | −0.054   | 0.286          | −0.189     | 0.850   |
| Year 2006                                                | −0.357   | 0.300          | −1.191     | 0.234   |
| Year 2007                                                | −0.403   | 0.293          | −1.378     | 0.168   |
| Year 2008                                                | 0.068    | 0.284          | 0.241      | 0.810   |
| Year 2009                                                | −0.243   | 0.294          | −0.828     | 0.408   |
| Year 2010                                                | −0.529   | 0.305          | −1.734     | 0.083   |
| Year 2011                                                | −0.125   | 0.285          | −0.436     | 0.663   |
| Year 2012                                                | −0.062   | 0.288          | −0.216     | 0.829   |
| Year 2013                                                | −0.419   | 0.294          | −1.425     | 0.154   |
| Year 2014                                                | −0.272   | 0.288          | −0.944     | 0.345   |
| Year 2015                                                | −0.497   | 0.298          | −1.670     | 0.095   |
| Year 2016                                                | −0.436   | 0.293          | −1.489     | 0.136   |
| Year 2017                                                | −0.465   | 0.299          | −1.554     | 0.120   |
| Year 2018                                                | −0.461   | 0.298          | −1.546     | 0.122   |
| Year 2019                                                | −0.513   | 0.300          | −1.708     | 0.088   |
| Sin                                                      | −0.073   | 0.039          | −1.847     | 0.065   |
| Cos                                                      | 0.191    | 0.062          | 3.091      | 0.002   |
| Smooth terms                                             |          | edf            | Chi square | p-value |
| s(X, Y)                                                  |          | 2.934          | 95.377     | < 0.001 |
| s(Elevation)                                             |          | 2.829          | 81.805     | < 0.001 |
| s(Slope)                                                 |          | 2.486          | 25.543     | < 0.001 |
| s(C110)                                                  |          | 0.658          | 1.832      | 0.094   |
| s(C112)                                                  |          | 1.843          | 13.770     | < 0.001 |
| s(C211)                                                  |          | 0.000          | 0.000      | 0.683   |
| s(C213)                                                  |          | 0.000          | 0.000      | 0.778   |
| s(C221)                                                  |          | 0.760          | 3.863      | 0.023   |
| s(C222)                                                  |          | 0.723          | 0.541      | 0.387   |
| s(C223)                                                  |          | 0.000          | 0.000      | 0.862   |
| s(C224)                                                  |          | 0.001          | 0.000      | 0.941   |
| s(C231)                                                  |          | 2.159          | 207.516    | < 0.001 |
| s(C311)                                                  |          | 0.001          | 0.000      | 0.583   |
| s(C312)                                                  |          | 2.839          | 24.556     | < 0.001 |
| s(C313)                                                  |          | 2.269          | 20.518     | < 0.001 |
| s(C320)                                                  |          | 0.005          | 0.000      | 0.871   |
| s(C321)                                                  |          | 2.842          | 252.486    | < 0.001 |
| s(C330)                                                  |          | 1.916          | 13.918     | < 0.001 |
| s(C410)                                                  |          | 0.196          | 0.249      | 0.259   |
| s(C511)                                                  |          | 0.946          | 17.296     | < 0.001 |



| Water Pipit ( <i>Anthus spinoletta</i> ) — Model C-ZINB-GAM |          |                |            |         |
|-------------------------------------------------------------|----------|----------------|------------|---------|
| Binomial component                                          |          |                |            |         |
| Parametric terms                                            | Estimate | Standard error | z-value    | p-value |
| Intercept                                                   | −2.936   | 0.047          | −62.850    | < 0.001 |
| Smooth terms                                                |          | edf            | Chi square | p-value |
| s(Elevation)                                                |          | 2.957          | 2245.000   | < 0.001 |
| s(Urb <sub>2500</sub> )                                     |          | 0.000          | 0.000      | 0.927   |
| s(For <sub>2500</sub> )                                     |          | 2.989          | 193.600    | < 0.001 |
| Count component                                             |          |                |            |         |
| Parametric terms                                            | Estimate | Standard error | z-value    | p-value |
| Intercept                                                   | −6.617   | 1.323          | −5.003     | < 0.001 |
| Year 1995                                                   | 0.271    | 0.432          | 0.628      | 0.530   |
| Year 1996                                                   | 0.028    | 0.445          | 0.064      | 0.949   |
| Year 1999                                                   | −0.469   | 0.466          | −1.007     | 0.314   |
| Year 2000                                                   | −0.444   | 0.427          | −1.039     | 0.299   |
| Year 2001                                                   | −0.388   | 0.434          | −0.894     | 0.371   |
| Year 2002                                                   | −0.210   | 0.428          | −0.490     | 0.624   |
| Year 2003                                                   | −0.763   | 0.433          | −1.764     | 0.078   |
| Year 2004                                                   | −0.513   | 0.432          | −1.188     | 0.235   |
| Year 2005                                                   | −0.258   | 0.422          | −0.612     | 0.541   |
| Year 2006                                                   | −0.584   | 0.434          | −1.347     | 0.178   |
| Year 2007                                                   | −0.156   | 0.429          | −0.363     | 0.717   |
| Year 2008                                                   | 0.014    | 0.425          | 0.032      | 0.974   |
| Year 2009                                                   | 0.064    | 0.424          | 0.150      | 0.881   |
| Year 2010                                                   | −0.094   | 0.430          | −0.219     | 0.827   |
| Year 2011                                                   | 0.006    | 0.428          | 0.013      | 0.989   |
| Year 2012                                                   | −0.273   | 0.425          | −0.643     | 0.520   |
| Year 2013                                                   | −0.187   | 0.428          | −0.438     | 0.662   |
| Year 2014                                                   | −0.240   | 0.427          | −0.563     | 0.574   |
| Year 2015                                                   | −0.098   | 0.425          | −0.230     | 0.818   |
| Year 2016                                                   | −0.270   | 0.429          | −0.630     | 0.529   |
| Year 2017                                                   | −0.258   | 0.429          | −0.601     | 0.548   |
| Year 2018                                                   | −0.149   | 0.428          | −0.348     | 0.728   |
| Year 2019                                                   | −0.203   | 0.429          | −0.472     | 0.637   |
| Sin                                                         | −0.124   | 0.043          | −2.911     | 0.004   |
| Cos                                                         | −0.049   | 0.063          | −0.766     | 0.444   |
| Smooth terms                                                |          | edf            | Chi square | p-value |
| s(X, Y)                                                     |          | 1.989          | 195.963    | < 0.001 |
| s(Elevation)                                                |          | 2.335          | 121.779    | < 0.001 |
| s(Slope)                                                    |          | 1.841          | 44.518     | < 0.001 |
| s(C110)                                                     |          | 0.324          | 0.510      | 0.208   |
| s(C112)                                                     |          | 0.735          | 2.662      | 0.052   |
| s(C211)                                                     |          | 0.000          | 0.000      | 0.644   |
| s(C213)                                                     |          | 0.000          | 0.000      | 0.872   |
| s(C221)                                                     |          | 0.349          | 1.046      | 0.079   |
| s(C222)                                                     |          | 0.000          | 0.000      | 0.806   |
| s(C223)                                                     |          | 0.000          | 0.000      | 0.967   |
| s(C224)                                                     |          | 0.000          | 0.000      | 0.630   |
| s(C231)                                                     |          | 0.000          | 0.000      | 0.646   |
| s(C311)                                                     |          | 0.764          | 2.799      | 0.048   |
| s(C312)                                                     |          | 1.235          | 163.133    | < 0.001 |
| s(C313)                                                     |          | 1.026          | 23.254     | < 0.001 |
| s(C320)                                                     |          | 0.920          | 9.697      | < 0.001 |
| s(C321)                                                     |          | 1.034          | 21.497     | < 0.001 |
| s(C330)                                                     |          | 0.578          | 1.359      | 0.111   |
| s(C410)                                                     |          | 0.284          | 0.422      | 0.222   |
| s(C511)                                                     |          | 0.842          | 5.120      | 0.014   |

| Western Yellow Wagtail ( <i>Motacilla flava</i> ) — Model C-ZIP-GAM |          |                |            |         |
|---------------------------------------------------------------------|----------|----------------|------------|---------|
| Binomial component                                                  |          |                |            |         |
| Parametric terms                                                    | Estimate | Standard error | z-value    | p-value |
| Intercept                                                           | −0.986   | 0.024          | −41.700    | < 0.001 |
| Smooth terms                                                        |          | edf            | Chi square | p-value |
| s(Elevation)                                                        |          | 2.869          | 798.400    | < 0.001 |
| s(Urb <sub>2500</sub> )                                             |          | 1.177          | 767.400    | < 0.001 |
| s(For <sub>2500</sub> )                                             |          | 2.989          | 1371.500   | < 0.001 |
| Count component                                                     |          |                |            |         |
| Parametric terms                                                    | Estimate | Standard error | z-value    | p-value |
| Intercept                                                           | −3.260   | 0.337          | −9.663     | < 0.001 |
| Year 1995                                                           | −0.350   | 0.133          | −2.640     | 0.008   |
| Year 1996                                                           | −0.467   | 0.129          | −3.624     | < 0.001 |
| Year 1999                                                           | −0.232   | 0.142          | −1.638     | 0.101   |
| Year 2000                                                           | −0.087   | 0.119          | −0.732     | 0.464   |
| Year 2001                                                           | −0.291   | 0.120          | −2.422     | 0.015   |
| Year 2002                                                           | −0.273   | 0.139          | −1.969     | 0.049   |
| Year 2003                                                           | −0.223   | 0.133          | −1.681     | 0.093   |
| Year 2004                                                           | −0.596   | 0.156          | −3.823     | < 0.001 |
| Year 2005                                                           | −0.425   | 0.117          | −3.626     | < 0.001 |
| Year 2006                                                           | −0.373   | 0.123          | −3.029     | 0.002   |
| Year 2007                                                           | −0.524   | 0.133          | −3.947     | < 0.001 |
| Year 2008                                                           | −0.499   | 0.138          | −3.620     | < 0.001 |
| Year 2009                                                           | −0.361   | 0.125          | −2.899     | 0.004   |
| Year 2010                                                           | −0.564   | 0.139          | −4.046     | < 0.001 |
| Year 2011                                                           | −0.686   | 0.137          | −5.020     | < 0.001 |
| Year 2012                                                           | −0.936   | 0.145          | −6.435     | < 0.001 |
| Year 2013                                                           | −0.487   | 0.133          | −3.670     | < 0.001 |
| Year 2014                                                           | −1.250   | 0.172          | −7.266     | < 0.001 |
| Year 2015                                                           | −0.731   | 0.143          | −5.123     | < 0.001 |
| Year 2016                                                           | −0.864   | 0.147          | −5.894     | < 0.001 |
| Year 2017                                                           | −0.698   | 0.161          | −4.335     | < 0.001 |
| Year 2018                                                           | −0.511   | 0.158          | −3.242     | 0.001   |
| Year 2019                                                           | −0.656   | 0.160          | −4.098     | 0.000   |
| Sin                                                                 | −0.031   | 0.028          | −1.114     | 0.265   |
| Cos                                                                 | 0.127    | 0.040          | 3.138      | 0.002   |
| Smooth terms                                                        |          | edf            | Chi square | p-value |
| s(X, Y)                                                             |          | 1.386          | 36.306     | < 0.001 |
| s(Elevation)                                                        |          | 0.001          | 0.001      | 0.189   |
| s(Slope)                                                            |          | 0.989          | 31.566     | < 0.001 |
| s(C110)                                                             |          | 2.583          | 63.728     | < 0.001 |
| s(C112)                                                             |          | 1.796          | 46.375     | < 0.001 |
| s(C211)                                                             |          | 2.971          | 113.624    | < 0.001 |
| s(C213)                                                             |          | 0.704          | 1.437      | 0.145   |
| s(C221)                                                             |          | 0.972          | 12.057     | < 0.001 |
| s(C222)                                                             |          | 0.001          | 0.000      | 0.616   |
| s(C223)                                                             |          | 0.721          | 1.679      | 0.127   |
| s(C224)                                                             |          | 2.243          | 30.767     | < 0.001 |
| s(C231)                                                             |          | 2.569          | 26.944     | < 0.001 |
| s(C311)                                                             |          | 1.147          | 62.737     | < 0.001 |
| s(C312)                                                             |          | 0.830          | 3.497      | 0.040   |
| s(C313)                                                             |          | 0.859          | 4.196      | 0.026   |
| s(C320)                                                             |          | 2.746          | 27.263     | < 0.001 |
| s(C321)                                                             |          | 0.819          | 2.882      | 0.060   |
| s(C330)                                                             |          | 1.803          | 7.215      | 0.015   |
| s(C410)                                                             |          | 0.873          | 3.647      | 0.039   |
| s(C511)                                                             |          | 0.993          | 8.382      | 0.003   |

| Grey Wagtail ( <i>Motacilla cinerea</i> ) — Model C-P-GAM |          |                |            |         |
|-----------------------------------------------------------|----------|----------------|------------|---------|
| Parametric terms                                          | Estimate | Standard error | z-value    | p-value |
| Intercept                                                 | −5.006   | 0.335          | −14.950    | < 0.001 |
| Year 1995                                                 | 0.417    | 0.367          | 1.137      | 0.255   |
| Year 1996                                                 | 0.555    | 0.363          | 1.527      | 0.127   |
| Year 1999                                                 | −0.028   | 0.357          | −0.078     | 0.938   |
| Year 2000                                                 | 0.818    | 0.334          | 2.446      | 0.014   |
| Year 2001                                                 | 0.527    | 0.358          | 1.470      | 0.142   |
| Year 2002                                                 | 0.293    | 0.398          | 0.735      | 0.462   |
| Year 2003                                                 | 0.056    | 0.390          | 0.142      | 0.887   |
| Year 2004                                                 | 0.150    | 0.411          | 0.365      | 0.715   |
| Year 2005                                                 | 0.198    | 0.364          | 0.543      | 0.587   |
| Year 2006                                                 | 0.251    | 0.364          | 0.690      | 0.490   |
| Year 2007                                                 | 0.344    | 0.377          | 0.911      | 0.362   |
| Year 2008                                                 | 0.313    | 0.375          | 0.835      | 0.404   |
| Year 2009                                                 | 0.444    | 0.372          | 1.195      | 0.232   |
| Year 2010                                                 | 0.347    | 0.375          | 0.927      | 0.354   |
| Year 2011                                                 | 0.032    | 0.379          | 0.085      | 0.932   |
| Year 2012                                                 | 0.293    | 0.373          | 0.785      | 0.433   |
| Year 2013                                                 | 0.263    | 0.365          | 0.720      | 0.472   |
| Year 2014                                                 | 0.389    | 0.367          | 1.060      | 0.289   |
| Year 2015                                                 | 0.183    | 0.363          | 0.506      | 0.613   |
| Year 2016                                                 | 0.349    | 0.360          | 0.969      | 0.332   |
| Year 2017                                                 | 0.312    | 0.388          | 0.804      | 0.421   |
| Year 2018                                                 | 0.334    | 0.382          | 0.875      | 0.382   |
| Year 2019                                                 | 0.166    | 0.390          | 0.425      | 0.671   |
| Sin                                                       | −0.042   | 0.059          | −0.706     | 0.481   |
| Cos                                                       | −0.428   | 0.094          | −4.546     | < 0.001 |
| Smooth terms                                              |          | edf            | Chi square | p-value |
| s(X,Y)                                                    |          | 2.943          | 74.973     | < 0.001 |
| s(Elevation)                                              |          | 2.808          | 11.297     | 0.007   |
| s(Slope)                                                  |          | 2.924          | 42.278     | < 0.001 |
| s(C110)                                                   |          | 2.866          | 10.761     | 0.010   |
| s(C112)                                                   |          | 2.051          | 15.864     | < 0.001 |
| s(C211)                                                   |          | 0.001          | 0.000      | 0.489   |
| s(C213)                                                   |          | 0.566          | 1.463      | 0.107   |
| s(C221)                                                   |          | 0.763          | 2.947      | 0.049   |
| s(C222)                                                   |          | 0.740          | 2.168      | 0.087   |
| s(C223)                                                   |          | 0.700          | 1.529      | 0.139   |
| s(C224)                                                   |          | 0.001          | 0.000      | 0.833   |
| s(C231)                                                   |          | 0.001          | 0.001      | 0.332   |
| s(C311)                                                   |          | 2.871          | 11.252     | 0.008   |
| s(C312)                                                   |          | 2.881          | 50.661     | < 0.001 |
| s(C313)                                                   |          | 1.623          | 2.997      | 0.149   |
| s(C320)                                                   |          | 1.465          | 1.151      | 0.426   |
| s(C321)                                                   |          | 0.001          | 0.001      | 0.412   |
| s(C330)                                                   |          | 2.673          | 34.371     | < 0.001 |
| s(C410)                                                   |          | 0.001          | 0.000      | 0.593   |
| s(C511)                                                   |          | 2.958          | 407.525    | < 0.001 |

| White Wagtail ( <i>Motacilla alba</i> ) — Model C-P-GAM |          |                |            |         |
|---------------------------------------------------------|----------|----------------|------------|---------|
| Parametric terms                                        | Estimate | Standard error | z-value    | p-value |
| Intercept                                               | −2.005   | 0.137          | −14.678    | < 0.001 |
| Year 1995                                               | −0.686   | 0.186          | −3.690     | < 0.001 |
| Year 1996                                               | −0.623   | 0.177          | −3.531     | < 0.001 |
| Year 1999                                               | −0.610   | 0.161          | −3.794     | < 0.001 |
| Year 2000                                               | −0.318   | 0.153          | −2.088     | 0.037   |
| Year 2001                                               | −0.280   | 0.160          | −1.754     | 0.079   |
| Year 2002                                               | −0.341   | 0.179          | −1.908     | 0.056   |
| Year 2003                                               | −0.486   | 0.175          | −2.778     | 0.005   |
| Year 2004                                               | −0.617   | 0.199          | −3.095     | 0.002   |
| Year 2005                                               | −0.795   | 0.167          | −4.768     | < 0.001 |
| Year 2006                                               | −0.654   | 0.165          | −3.969     | < 0.001 |
| Year 2007                                               | −0.723   | 0.182          | −3.979     | < 0.001 |
| Year 2008                                               | −0.820   | 0.187          | −4.382     | < 0.001 |
| Year 2009                                               | −0.875   | 0.188          | −4.659     | < 0.001 |
| Year 2010                                               | −0.965   | 0.189          | −5.119     | < 0.001 |
| Year 2011                                               | −0.590   | 0.166          | −3.560     | < 0.001 |
| Year 2012                                               | −0.991   | 0.187          | −5.298     | < 0.001 |
| Year 2013                                               | −0.573   | 0.168          | −3.407     | < 0.001 |
| Year 2014                                               | −0.753   | 0.171          | −4.398     | < 0.001 |
| Year 2015                                               | −0.829   | 0.174          | −4.762     | < 0.001 |
| Year 2016                                               | −0.584   | 0.167          | −3.503     | < 0.001 |
| Year 2017                                               | −0.979   | 0.201          | −4.865     | < 0.001 |
| Year 2018                                               | −0.696   | 0.186          | −3.739     | < 0.001 |
| Year 2019                                               | −0.636   | 0.182          | −3.492     | < 0.001 |
| Sin                                                     | −0.059   | 0.034          | −1.757     | 0.079   |
| Cos                                                     | 0.073    | 0.051          | 1.438      | 0.150   |
| Smooth terms                                            | edf      |                | Chi square | p-value |
| s(X,Y)                                                  | 1.905    |                | 75.686     | < 0.001 |
| s(Elevation)                                            | 2.893    |                | 120.572    | < 0.001 |
| s(Slope)                                                | 2.656    |                | 45.114     | < 0.001 |
| s(C110)                                                 | 1.929    |                | 6.750      | 0.022   |
| s(C112)                                                 | 2.270    |                | 29.553     | < 0.001 |
| s(C211)                                                 | 0.920    |                | 10.535     | < 0.001 |
| s(C213)                                                 | 0.884    |                | 7.721      | 0.003   |
| s(C221)                                                 | 1.236    |                | 14.036     | < 0.001 |
| s(C222)                                                 | 0.901    |                | 6.280      | 0.008   |
| s(C223)                                                 | 0.609    |                | 1.197      | 0.160   |
| s(C224)                                                 | 0.834    |                | 5.396      | 0.011   |
| s(C231)                                                 | 0.000    |                | 0.000      | 0.616   |
| s(C311)                                                 | 2.472    |                | 205.990    | < 0.001 |
| s(C312)                                                 | 2.142    |                | 172.025    | < 0.001 |
| s(C313)                                                 | 2.055    |                | 132.343    | < 0.001 |
| s(C320)                                                 | 1.015    |                | 76.723     | < 0.001 |
| s(C321)                                                 | 2.781    |                | 41.179     | < 0.001 |
| s(C330)                                                 | 2.076    |                | 41.001     | < 0.001 |
| s(C410)                                                 | 0.001    |                | 0.000      | 0.447   |
| s(C511)                                                 | 2.761    |                | 189.471    | < 0.001 |

| Eurasian Wren ( <i>Troglodytes troglodytes</i> ) — Model C-ZIP-GAM |          |                |            |         |
|--------------------------------------------------------------------|----------|----------------|------------|---------|
| Binomial component                                                 |          |                |            |         |
| Parametric terms                                                   | Estimate | Standard error | z-value    | p-value |
| Intercept                                                          | 0.648    | 0.052          | 12.550     | < 0.001 |
| Smooth terms                                                       |          | edf            | Chi square | p-value |
| s(Elevation)                                                       |          | 2.992          | 1194.390   | < 0.001 |
| s(Urb <sub>2500</sub> )                                            |          | 2.927          | 97.270     | < 0.001 |
| s(For <sub>2500</sub> )                                            |          | 2.990          | 1050.900   | < 0.001 |
| Count component                                                    |          |                |            |         |
| Parametric terms                                                   | Estimate | Standard error | z-value    | p-value |
| Intercept                                                          | −1.295   | 0.105          | −12.325    | < 0.001 |
| Year 1995                                                          | −0.137   | 0.130          | −1.058     | 0.290   |
| Year 1996                                                          | −0.098   | 0.130          | −0.753     | 0.452   |
| Year 1999                                                          | 0.070    | 0.109          | 0.644      | 0.520   |
| Year 2000                                                          | 0.085    | 0.106          | 0.799      | 0.425   |
| Year 2001                                                          | 0.213    | 0.113          | 1.883      | 0.060   |
| Year 2002                                                          | 0.033    | 0.124          | 0.265      | 0.791   |
| Year 2003                                                          | −0.097   | 0.127          | −0.761     | 0.447   |
| Year 2004                                                          | −0.102   | 0.140          | −0.728     | 0.466   |
| Year 2005                                                          | −0.245   | 0.122          | −2.015     | 0.044   |
| Year 2006                                                          | −0.277   | 0.121          | −2.284     | 0.022   |
| Year 2007                                                          | −0.376   | 0.132          | −2.857     | 0.004   |
| Year 2008                                                          | 0.050    | 0.120          | 0.413      | 0.679   |
| Year 2009                                                          | −0.352   | 0.132          | −2.665     | 0.008   |
| Year 2010                                                          | −0.249   | 0.130          | −1.920     | 0.055   |
| Year 2011                                                          | −0.058   | 0.118          | −0.497     | 0.619   |
| Year 2012                                                          | −0.314   | 0.129          | −2.436     | 0.015   |
| Year 2013                                                          | −0.516   | 0.132          | −3.898     | < 0.001 |
| Year 2014                                                          | −0.359   | 0.128          | −2.798     | 0.005   |
| Year 2015                                                          | 0.020    | 0.119          | 0.171      | 0.865   |
| Year 2016                                                          | 0.058    | 0.118          | 0.487      | 0.626   |
| Year 2017                                                          | 0.196    | 0.122          | 1.605      | 0.108   |
| Year 2018                                                          | −0.018   | 0.127          | −0.138     | 0.890   |
| Year 2019                                                          | −0.218   | 0.133          | −1.640     | 0.101   |
| Sin                                                                | −0.083   | 0.022          | −3.805     | < 0.001 |
| Cos                                                                | −0.091   | 0.032          | −2.849     | 0.004   |
| Smooth terms                                                       |          | edf            | Chi square | p-value |
| s(X, Y)                                                            |          | 1.336          | 4.695      | 0.029   |
| s(Elevation)                                                       |          | 2.999          | 114.151    | < 0.001 |
| s(Slope)                                                           |          | 2.704          | 72.199     | < 0.001 |
| s(C110)                                                            |          | 2.913          | 13.473     | 0.002   |
| s(C112)                                                            |          | 0.619          | 2.201      | 0.050   |
| s(C211)                                                            |          | 0.754          | 4.787      | 0.008   |
| s(C213)                                                            |          | 0.001          | 0.000      | 0.762   |
| s(C221)                                                            |          | 0.703          | 2.316      | 0.066   |
| s(C222)                                                            |          | 0.002          | 0.001      | 0.575   |
| s(C223)                                                            |          | 0.882          | 5.962      | 0.009   |
| s(C224)                                                            |          | 1.843          | 23.095     | < 0.001 |
| s(C231)                                                            |          | 1.710          | 38.390     | < 0.001 |
| s(C311)                                                            |          | 2.609          | 183.394    | < 0.001 |
| s(C312)                                                            |          | 2.926          | 208.747    | < 0.001 |
| s(C313)                                                            |          | 2.097          | 180.425    | < 0.001 |
| s(C320)                                                            |          | 2.615          | 94.183     | < 0.001 |
| s(C321)                                                            |          | 2.603          | 102.242    | < 0.001 |
| s(C330)                                                            |          | 0.971          | 35.375     | 0.000   |
| s(C410)                                                            |          | 0.001          | 0.000      | 0.613   |
| s(C511)                                                            |          | 2.884          | 121.164    | < 2e−16 |

| <b>Dunnock (<i>Prunella modularis</i>) — Model C-P-GAM</b> |                 |                       |                   |                |
|------------------------------------------------------------|-----------------|-----------------------|-------------------|----------------|
| <b>Parametric terms</b>                                    | <b>Estimate</b> | <b>Standard error</b> | <b>z-value</b>    | <b>p-value</b> |
| Intercept                                                  | −7.917          | 3.509                 | −2.256            | 0.024          |
| Year 1995                                                  | −1.697          | 0.559                 | −3.037            | 0.002          |
| Year 1996                                                  | 0.286           | 0.393                 | 0.726             | 0.468          |
| Year 1999                                                  | −0.151          | 0.373                 | −0.405            | 0.686          |
| Year 2000                                                  | 0.254           | 0.362                 | 0.700             | 0.484          |
| Year 2001                                                  | 0.419           | 0.364                 | 1.153             | 0.249          |
| Year 2002                                                  | 0.783           | 0.368                 | 2.124             | 0.034          |
| Year 2003                                                  | 0.131           | 0.372                 | 0.352             | 0.725          |
| Year 2004                                                  | 0.259           | 0.384                 | 0.674             | 0.500          |
| Year 2005                                                  | 0.287           | 0.357                 | 0.803             | 0.422          |
| Year 2006                                                  | 0.241           | 0.381                 | 0.632             | 0.528          |
| Year 2007                                                  | 0.285           | 0.364                 | 0.785             | 0.433          |
| Year 2008                                                  | 0.275           | 0.360                 | 0.765             | 0.444          |
| Year 2009                                                  | 0.428           | 0.360                 | 1.191             | 0.234          |
| Year 2010                                                  | 0.374           | 0.362                 | 1.032             | 0.302          |
| Year 2011                                                  | 0.512           | 0.354                 | 1.447             | 0.148          |
| Year 2012                                                  | 0.699           | 0.352                 | 1.985             | 0.047          |
| Year 2013                                                  | 0.679           | 0.351                 | 1.936             | 0.053          |
| Year 2014                                                  | 0.740           | 0.350                 | 2.114             | 0.035          |
| Year 2015                                                  | 0.877           | 0.348                 | 2.524             | 0.012          |
| Year 2016                                                  | 0.580           | 0.352                 | 1.651             | 0.099          |
| Year 2017                                                  | 0.468           | 0.360                 | 1.300             | 0.194          |
| Year 2018                                                  | 0.469           | 0.360                 | 1.303             | 0.193          |
| Year 2019                                                  | 0.628           | 0.357                 | 1.758             | 0.079          |
| Sin                                                        | −0.134          | 0.041                 | −3.247            | 0.001          |
| Cos                                                        | 0.001           | 0.058                 | 0.009             | 0.993          |
| <b>Smooth terms</b>                                        | <b>edf</b>      |                       | <b>Chi square</b> | <b>p-value</b> |
| s(X,Y)                                                     | 1.864           |                       | 17.912            | < 0.001        |
| s(Elevation)                                               | 2.982           |                       | 299.735           | < 0.001        |
| s(Slope)                                                   | 2.485           |                       | 21.832            | < 0.001        |
| s(C110)                                                    | 2.807           |                       | 15.766            | < 0.001        |
| s(C112)                                                    | 1.825           |                       | 10.233            | 0.003          |
| s(C211)                                                    | 0.057           |                       | 0.056             | 0.317          |
| s(C213)                                                    | 0.710           |                       | 0.043             | 0.807          |
| s(C221)                                                    | 0.559           |                       | 0.319             | 0.450          |
| s(C222)                                                    | 0.001           |                       | 0.000             | 0.743          |
| s(C223)                                                    | 0.000           |                       | 0.000             | 0.867          |
| s(C224)                                                    | 0.001           |                       | 0.000             | 0.492          |
| s(C231)                                                    | 2.245           |                       | 17.772            | < 0.001        |
| s(C311)                                                    | 0.894           |                       | 8.162             | 0.002          |
| s(C312)                                                    | 2.778           |                       | 32.628            | < 0.001        |
| s(C313)                                                    | 2.239           |                       | 7.858             | 0.018          |
| s(C320)                                                    | 2.255           |                       | 40.383            | < 0.001        |
| s(C321)                                                    | 2.433           |                       | 35.524            | < 0.001        |
| s(C330)                                                    | 0.002           |                       | 0.001             | 0.493          |
| s(C410)                                                    | 0.004           |                       | 0.003             | 0.396          |
| s(C511)                                                    | 0.001           |                       | 0.001             | 0.435          |

| European Robin ( <i>Erithacus rubecula</i> ) — Model C-ZIP-GAM |          |                |            |         |
|----------------------------------------------------------------|----------|----------------|------------|---------|
| Binomial component                                             |          |                |            |         |
| Parametric terms                                               | Estimate | Standard error | z-value    | p-value |
| Intercept                                                      | −0.030   | 0.034          | −0.875     | 0.382   |
| Smooth terms                                                   |          | edf            | Chi square | p-value |
| s(Elevation)                                                   |          | 2.985          | 515.800    | < 0.001 |
| s(Urb <sub>2500</sub> )                                        |          | 2.963          | 441.300    | < 0.001 |
| s(For <sub>2500</sub> )                                        |          | 2.976          | 1563.600   | < 0.001 |
| Count component                                                |          |                |            |         |
| Parametric terms                                               | Estimate | Standard error | z-value    | p-value |
| Intercept                                                      | −2.284   | 0.140          | −16.281    | < 0.001 |
| Year 1995                                                      | 0.016    | 0.142          | 0.115      | 0.909   |
| Year 1996                                                      | 0.173    | 0.138          | 1.261      | 0.207   |
| Year 1999                                                      | 0.285    | 0.115          | 2.467      | 0.014   |
| Year 2000                                                      | 0.221    | 0.113          | 1.948      | 0.051   |
| Year 2001                                                      | 0.497    | 0.118          | 4.205      | < 0.001 |
| Year 2002                                                      | 0.300    | 0.123          | 2.440      | 0.015   |
| Year 2003                                                      | 0.056    | 0.132          | 0.425      | 0.671   |
| Year 2004                                                      | 0.090    | 0.143          | 0.628      | 0.530   |
| Year 2005                                                      | 0.267    | 0.123          | 2.166      | 0.030   |
| Year 2006                                                      | 0.115    | 0.123          | 0.937      | 0.349   |
| Year 2007                                                      | 0.316    | 0.126          | 2.513      | 0.012   |
| Year 2008                                                      | 0.139    | 0.131          | 1.062      | 0.288   |
| Year 2009                                                      | 0.054    | 0.134          | 0.404      | 0.686   |
| Year 2010                                                      | 0.076    | 0.135          | 0.562      | 0.574   |
| Year 2011                                                      | 0.355    | 0.122          | 2.904      | 0.004   |
| Year 2012                                                      | 0.106    | 0.131          | 0.805      | 0.421   |
| Year 2013                                                      | −0.002   | 0.133          | −0.012     | 0.990   |
| Year 2014                                                      | 0.194    | 0.128          | 1.512      | 0.131   |
| Year 2015                                                      | 0.410    | 0.125          | 3.285      | 0.001   |
| Year 2016                                                      | 0.415    | 0.124          | 3.355      | 0.001   |
| Year 2017                                                      | 0.417    | 0.130          | 3.215      | < 0.001 |
| Year 2018                                                      | 0.402    | 0.131          | 3.070      | 0.002   |
| Year 2019                                                      | 0.152    | 0.138          | 1.101      | 0.271   |
| Sin                                                            | 0.020    | 0.020          | 1.012      | 0.312   |
| Cos                                                            | −0.024   | 0.029          | −0.821     | 0.411   |
| Smooth terms                                                   |          | edf            | Chi square | p-value |
| s(X, Y)                                                        |          | 2.900          | 159.031    | < 0.001 |
| s(Elevation)                                                   |          | 2.868          | 146.902    | < 0.001 |
| s(Slope)                                                       |          | 0.001          | 0.000      | 0.594   |
| s(C110)                                                        |          | 1.057          | 96.924     | < 0.001 |
| s(C112)                                                        |          | 1.031          | 93.059     | < 0.001 |
| s(C211)                                                        |          | 2.189          | 42.451     | < 0.001 |
| s(C213)                                                        |          | 0.937          | 10.092     | < 0.001 |
| s(C221)                                                        |          | 0.001          | 0.000      | 0.889   |
| s(C222)                                                        |          | 0.001          | 0.000      | 0.604   |
| s(C223)                                                        |          | 0.870          | 5.067      | 0.016   |
| s(C224)                                                        |          | 0.181          | 0.240      | 0.248   |
| s(C231)                                                        |          | 0.001          | 0.000      | 0.565   |
| s(C311)                                                        |          | 2.551          | 399.320    | < 0.001 |
| s(C312)                                                        |          | 1.388          | 376.424    | < 0.001 |
| s(C313)                                                        |          | 2.147          | 412.555    | < 0.001 |
| s(C320)                                                        |          | 2.152          | 58.493     | < 0.001 |
| s(C321)                                                        |          | 2.818          | 26.209     | < 0.001 |
| s(C330)                                                        |          | 1.208          | 1.970      | 0.189   |
| s(C410)                                                        |          | 0.882          | 6.815      | 0.005   |
| s(C511)                                                        |          | 1.817          | 10.741     | 0.003   |

| Common Nigthingale ( <i>Luscinia megarhynchos</i> ) — Model C-ZIP-GAM |          |                |            |         |
|-----------------------------------------------------------------------|----------|----------------|------------|---------|
| Binomial component                                                    |          |                |            |         |
| Parametric terms                                                      | Estimate | Standard error | z-value    | p-value |
| Intercept                                                             | 1.323    | 0.041          | 32.000     | < 0.001 |
| Smooth terms                                                          |          | edf            | Chi square | p-value |
| s(Elevation)                                                          |          | 2.991          | 2115.900   | < 0.001 |
| s(Urb <sub>2500</sub> )                                               |          | 2.991          | 1970.500   | < 0.001 |
| s(For <sub>2500</sub> )                                               |          | 2.651          | 936.900    | < 0.001 |
| Count component                                                       |          |                |            |         |
| Parametric terms                                                      | Estimate | Standard error | z-value    | p-value |
| Intercept                                                             | -1.057   | 0.106          | -9.924     | < 0.001 |
| Year 1995                                                             | -0.546   | 0.065          | -8.352     | < 0.001 |
| Year 1996                                                             | -0.562   | 0.069          | -8.108     | < 0.001 |
| Year 1999                                                             | -0.441   | 0.063          | -6.969     | < 0.001 |
| Year 2000                                                             | -0.518   | 0.062          | -8.414     | < 0.001 |
| Year 2001                                                             | -0.665   | 0.064          | -10.408    | < 0.001 |
| Year 2002                                                             | -0.802   | 0.081          | -9.858     | < 0.001 |
| Year 2003                                                             | -0.615   | 0.078          | -7.911     | < 0.001 |
| Year 2004                                                             | -0.594   | 0.095          | -6.249     | < 0.001 |
| Year 2005                                                             | -0.488   | 0.062          | -7.927     | < 0.001 |
| Year 2006                                                             | -0.592   | 0.064          | -9.236     | < 0.001 |
| Year 2007                                                             | -0.300   | 0.066          | -4.544     | < 0.001 |
| Year 2008                                                             | -0.390   | 0.070          | -5.595     | < 0.001 |
| Year 2009                                                             | -0.473   | 0.068          | -6.912     | < 0.001 |
| Year 2010                                                             | -0.457   | 0.068          | -6.699     | < 0.001 |
| Year 2011                                                             | -0.623   | 0.071          | -8.821     | < 0.001 |
| Year 2012                                                             | -0.699   | 0.074          | -9.476     | < 0.001 |
| Year 2013                                                             | -0.473   | 0.068          | -6.947     | < 0.001 |
| Year 2014                                                             | -0.537   | 0.072          | -7.511     | < 0.001 |
| Year 2015                                                             | -0.722   | 0.075          | -9.663     | < 0.001 |
| Year 2016                                                             | -0.594   | 0.072          | -8.270     | < 0.001 |
| Year 2017                                                             | -0.460   | 0.076          | -6.026     | < 0.001 |
| Year 2018                                                             | -0.496   | 0.077          | -6.473     | < 0.001 |
| Year 2019                                                             | -0.435   | 0.076          | -5.728     | < 0.001 |
| Sin                                                                   | -0.046   | 0.016          | -2.923     | 0.003   |
| Cos                                                                   | -0.007   | 0.024          | -0.280     | 0.779   |
| Smooth terms                                                          |          | edf            | Chi square | p-value |
| s(X, Y)                                                               |          | 2.957          | 37.354     | < 0.001 |
| s(Elevation)                                                          |          | 2.114          | 110.467    | < 0.001 |
| s(Slope)                                                              |          | 2.954          | 111.076    | < 0.001 |
| s(C110)                                                               |          | 2.952          | 181.908    | < 0.001 |
| s(C112)                                                               |          | 1.021          | 180.278    | < 0.001 |
| s(C211)                                                               |          | 1.721          | 32.042     | < 0.001 |
| s(C213)                                                               |          | 2.813          | 15.533     | < 0.001 |
| s(C221)                                                               |          | 0.547          | 1.104      | 0.148   |
| s(C222)                                                               |          | 0.000          | 0.000      | 0.660   |
| s(C223)                                                               |          | 1.826          | 4.165      | 0.094   |
| s(C224)                                                               |          | 1.913          | 33.165     | < 0.001 |
| s(C231)                                                               |          | 1.061          | 28.730     | < 0.001 |
| s(C311)                                                               |          | 2.924          | 280.454    | < 0.001 |
| s(C312)                                                               |          | 0.000          | 0.000      | 0.917   |
| s(C313)                                                               |          | 2.594          | 6.399      | 0.061   |
| s(C320)                                                               |          | 1.011          | 64.455     | < 0.001 |
| s(C321)                                                               |          | 0.000          | 0.000      | 0.704   |
| s(C330)                                                               |          | 0.000          | 0.000      | 0.962   |
| s(C410)                                                               |          | 0.875          | 10.867     | < 0.001 |
| s(C511)                                                               |          | 1.966          | 51.633     | < 0.001 |



| Black Redstart ( <i>Phoenicurus ochruros</i> ) — Model C-ZIP-GAM |          |                |            |         |
|------------------------------------------------------------------|----------|----------------|------------|---------|
| Binomial component                                               |          |                |            |         |
| Parametric terms                                                 | Estimate | Standard error | z-value    | p-value |
| Intercept                                                        | −0.441   | 0.048          | −9.120     | < 0.001 |
| Smooth terms                                                     |          | edf            | Chi square | p-value |
| s(Elevation)                                                     |          | 2.962          | 1147.600   | < 0.001 |
| s(Urb <sub>2500</sub> )                                          |          | 1.095          | 212.100    | < 0.001 |
| s(For <sub>2500</sub> )                                          |          | 2.342          | 27.200     | < 0.001 |
| Count component                                                  |          |                |            |         |
| Parametric terms                                                 | Estimate | Standard error | z-value    | p-value |
| Intercept                                                        | −3.120   | 0.326          | −9.582     | < 0.001 |
| Year 1995                                                        | −0.020   | 0.365          | −0.056     | 0.955   |
| Year 1996                                                        | −0.196   | 0.389          | −0.504     | 0.614   |
| Year 1999                                                        | 0.180    | 0.348          | 0.517      | 0.605   |
| Year 2000                                                        | 0.280    | 0.336          | 0.834      | 0.405   |
| Year 2001                                                        | 0.347    | 0.343          | 1.011      | 0.312   |
| Year 2002                                                        | 0.400    | 0.348          | 1.151      | 0.250   |
| Year 2003                                                        | 0.484    | 0.336          | 1.440      | 0.150   |
| Year 2004                                                        | 0.531    | 0.340          | 1.562      | 0.118   |
| Year 2005                                                        | 0.599    | 0.330          | 1.812      | 0.070   |
| Year 2006                                                        | 0.343    | 0.341          | 1.006      | 0.314   |
| Year 2007                                                        | 0.562    | 0.338          | 1.662      | 0.097   |
| Year 2008                                                        | 0.443    | 0.338          | 1.312      | 0.190   |
| Year 2009                                                        | 0.551    | 0.337          | 1.633      | 0.102   |
| Year 2010                                                        | 0.502    | 0.338          | 1.487      | 0.137   |
| Year 2011                                                        | 0.732    | 0.332          | 2.204      | 0.028   |
| Year 2012                                                        | 0.621    | 0.333          | 1.866      | 0.062   |
| Year 2013                                                        | 0.712    | 0.332          | 2.141      | 0.032   |
| Year 2014                                                        | 0.778    | 0.329          | 2.365      | 0.018   |
| Year 2015                                                        | 0.534    | 0.332          | 1.605      | 0.109   |
| Year 2016                                                        | 0.597    | 0.332          | 1.799      | 0.072   |
| Year 2017                                                        | 0.440    | 0.340          | 1.296      | 0.195   |
| Year 2018                                                        | 0.653    | 0.337          | 1.934      | 0.053   |
| Year 2019                                                        | 0.505    | 0.339          | 1.488      | 0.137   |
| Sin                                                              | −0.009   | 0.034          | −0.265     | 0.791   |
| Cos                                                              | 0.017    | 0.052          | 0.320      | 0.749   |
| Smooth terms                                                     |          | edf            | Chi square | p-value |
| s(X, Y)                                                          |          | 1.771          | 27.221     | < 0.001 |
| s(Elevation)                                                     |          | 2.906          | 186.283    | < 0.001 |
| s(Slope)                                                         |          | 0.000          | 0.000      | 0.540   |
| s(C110)                                                          |          | 1.767          | 82.392     | < 0.001 |
| s(C112)                                                          |          | 2.788          | 157.183    | < 0.001 |
| s(C211)                                                          |          | 0.000          | 0.000      | 0.830   |
| s(C213)                                                          |          | 0.000          | 0.000      | 0.806   |
| s(C221)                                                          |          | 0.031          | 0.032      | 0.306   |
| s(C222)                                                          |          | 0.001          | 0.000      | 0.466   |
| s(C223)                                                          |          | 0.658          | 1.125      | 0.191   |
| s(C224)                                                          |          | 0.000          | 0.000      | 0.553   |
| s(C231)                                                          |          | 1.921          | 10.728     | < 0.001 |
| s(C311)                                                          |          | 2.178          | 52.404     | < 0.001 |
| s(C312)                                                          |          | 2.180          | 39.294     | < 0.001 |
| s(C313)                                                          |          | 2.559          | 34.261     | < 0.001 |
| s(C320)                                                          |          | 2.266          | 14.930     | < 0.001 |
| s(C321)                                                          |          | 0.815          | 3.559      | 0.032   |
| s(C330)                                                          |          | 2.471          | 53.138     | < 0.001 |
| s(C410)                                                          |          | 0.464          | 0.827      | 0.180   |
| s(C511)                                                          |          | 0.670          | 2.013      | 0.082   |

| Common Redstart ( <i>Phoenicurus Phoenicurus</i> ) — Model C-ZIP-GAM |          |                |            |         |
|----------------------------------------------------------------------|----------|----------------|------------|---------|
| Binomial component                                                   |          |                |            |         |
| Parametric terms                                                     | Estimate | Standard error | z-value    | p-value |
| Intercept                                                            | 0.268    | 0.024          | 11.020     | < 0.001 |
| Smooth terms                                                         |          | edf            | Chi square | p-value |
| s(Elevation)                                                         |          | 2.999          | 1672.400   | < 0.001 |
| s(Urb <sub>2500</sub> )                                              |          | 0.981          | 24.140     | < 0.001 |
| s(For <sub>2500</sub> )                                              |          | 2.335          | 133.800    | < 0.001 |
| Count component                                                      |          |                |            |         |
| Parametric terms                                                     | Estimate | Standard error | z-value    | p-value |
| Intercept                                                            | −2.772   | 0.213          | −12.989    | < 0.001 |
| Year 1995                                                            | 0.327    | 0.250          | 1.307      | 0.191   |
| Year 1996                                                            | −0.224   | 0.262          | −0.854     | 0.393   |
| Year 1999                                                            | 0.594    | 0.222          | 2.677      | 0.007   |
| Year 2000                                                            | 0.923    | 0.215          | 4.288      | < 0.001 |
| Year 2001                                                            | 0.753    | 0.226          | 3.329      | < 0.001 |
| Year 2002                                                            | 0.675    | 0.238          | 2.840      | 0.005   |
| Year 2003                                                            | 0.415    | 0.246          | 1.688      | 0.091   |
| Year 2004                                                            | 0.240    | 0.276          | 0.870      | 0.384   |
| Year 2005                                                            | 0.868    | 0.221          | 3.925      | < 0.001 |
| Year 2006                                                            | 0.716    | 0.222          | 3.220      | 0.001   |
| Year 2007                                                            | 0.824    | 0.226          | 3.647      | < 0.001 |
| Year 2008                                                            | 0.867    | 0.228          | 3.796      | < 0.001 |
| Year 2009                                                            | 0.644    | 0.234          | 2.751      | 0.006   |
| Year 2010                                                            | 0.792    | 0.227          | 3.481      | < 0.001 |
| Year 2011                                                            | 0.865    | 0.220          | 3.940      | < 0.001 |
| Year 2012                                                            | 0.826    | 0.224          | 3.694      | < 0.001 |
| Year 2013                                                            | 1.004    | 0.220          | 4.559      | < 0.001 |
| Year 2014                                                            | 0.995    | 0.218          | 4.558      | < 0.001 |
| Year 2015                                                            | 0.836    | 0.224          | 3.740      | < 0.001 |
| Year 2016                                                            | 0.666    | 0.225          | 2.968      | 0.003   |
| Year 2017                                                            | 0.667    | 0.237          | 2.819      | 0.005   |
| Year 2018                                                            | 0.541    | 0.241          | 2.245      | 0.025   |
| Year 2019                                                            | 0.642    | 0.236          | 2.716      | 0.007   |
| Sin                                                                  | −0.077   | 0.030          | −2.588     | 0.010   |
| Cos                                                                  | 0.029    | 0.045          | 0.657      | 0.511   |
| Smooth terms                                                         |          | edf            | Chi square | p-value |
| s(X, Y)                                                              |          | 1.290          | 4.697      | 0.025   |
| s(Elevation)                                                         |          | 2.548          | 59.882     | < 0.001 |
| s(Slope)                                                             |          | 2.524          | 53.958     | < 0.001 |
| s(C110)                                                              |          | 1.107          | 243.910    | < 0.001 |
| s(C112)                                                              |          | 2.924          | 312.361    | < 0.001 |
| s(C211)                                                              |          | 0.133          | 0.249      | 0.163   |
| s(C213)                                                              |          | 0.878          | 7.432      | 0.003   |
| s(C221)                                                              |          | 2.267          | 85.016     | < 0.001 |
| s(C222)                                                              |          | 0.872          | 10.295     | < 0.001 |
| s(C223)                                                              |          | 1.783          | 2.915      | 0.185   |
| s(C224)                                                              |          | 0.000          | 0.000      | 0.777   |
| s(C231)                                                              |          | 2.325          | 118.859    | < 0.001 |
| s(C311)                                                              |          | 2.707          | 35.278     | < 0.001 |
| s(C312)                                                              |          | 0.002          | 0.000      | 0.853   |
| s(C313)                                                              |          | 1.873          | 5.090      | 0.053   |
| s(C320)                                                              |          | 0.833          | 5.676      | 0.008   |
| s(C321)                                                              |          | 2.738          | 44.594     | < 0.001 |
| s(C330)                                                              |          | 0.011          | 0.011      | 0.314   |
| s(C410)                                                              |          | 0.892          | 7.395      | 0.004   |
| s(C511)                                                              |          | 0.679          | 1.978      | 0.087   |

| African Stonechat ( <i>Saxicola torquatus</i> ) — Model C-ZIP-GAM |          |                |            |         |
|-------------------------------------------------------------------|----------|----------------|------------|---------|
| Binomial component                                                |          |                |            |         |
| Parametric terms                                                  | Estimate | Standard error | z-value    | p-value |
| Intercept                                                         | −1.162   | 0.020          | −57.030    | < 0.001 |
| Smooth terms                                                      |          | edf            | Chi square | p-value |
| s(Elevation)                                                      |          | 1.127          | 494.500    | < 0.001 |
| s(Urb <sub>2500</sub> )                                           |          | 0.002          | 0.000      | 1.000   |
| s(For <sub>2500</sub> )                                           |          | 2.943          | 451.500    | < 0.001 |
| Count component                                                   |          |                |            |         |
| Parametric terms                                                  | Estimate | Standard error | z-value    | p-value |
| Intercept                                                         | −2.886   | 0.258          | −11.180    | < 0.001 |
| Year 1995                                                         | −0.337   | 0.316          | −1.067     | 0.286   |
| Year 1996                                                         | 0.550    | 0.273          | 2.013      | 0.044   |
| Year 1999                                                         | 0.506    | 0.281          | 1.796      | 0.073   |
| Year 2000                                                         | 0.538    | 0.265          | 2.027      | 0.043   |
| Year 2001                                                         | 0.769    | 0.265          | 2.901      | 0.004   |
| Year 2002                                                         | 0.568    | 0.294          | 1.934      | 0.053   |
| Year 2003                                                         | 0.443    | 0.303          | 1.461      | 0.144   |
| Year 2004                                                         | 0.813    | 0.298          | 2.724      | 0.006   |
| Year 2005                                                         | 0.742    | 0.259          | 2.870      | 0.004   |
| Year 2006                                                         | −0.485   | 0.308          | −1.574     | 0.116   |
| Year 2007                                                         | 0.205    | 0.287          | 0.715      | 0.475   |
| Year 2008                                                         | 0.047    | 0.300          | 0.158      | 0.874   |
| Year 2009                                                         | −0.751   | 0.359          | −2.092     | 0.036   |
| Year 2010                                                         | −0.369   | 0.326          | −1.132     | 0.258   |
| Year 2011                                                         | −1.109   | 0.366          | −3.032     | 0.002   |
| Year 2012                                                         | −1.311   | 0.410          | −3.197     | 0.001   |
| Year 2013                                                         | −0.418   | 0.320          | −1.307     | 0.191   |
| Year 2014                                                         | −0.851   | 0.375          | −2.273     | 0.023   |
| Year 2015                                                         | −0.580   | 0.336          | −1.728     | 0.084   |
| Year 2016                                                         | −0.645   | 0.340          | −1.894     | 0.058   |
| Year 2017                                                         | −1.150   | 0.447          | −2.576     | 0.010   |
| Year 2018                                                         | −0.670   | 0.384          | −1.745     | 0.081   |
| Year 2019                                                         | −1.455   | 0.507          | −2.871     | 0.004   |
| Sin                                                               | 0.033    | 0.056          | 0.592      | 0.554   |
| Cos                                                               | −0.002   | 0.083          | −0.026     | 0.979   |
| Smooth terms                                                      |          | edf            | Chi square | p-value |
| s(X, Y)                                                           |          | 2.970          | 95.359     | < 0.001 |
| s(Elevation)                                                      |          | 2.784          | 76.100     | < 0.001 |
| s(Slope)                                                          |          | 1.001          | 8.161      | 0.003   |
| s(C110)                                                           |          | 1.656          | 36.969     | < 0.001 |
| s(C112)                                                           |          | 1.870          | 11.101     | 0.002   |
| s(C211)                                                           |          | 2.835          | 44.528     | < 0.001 |
| s(C213)                                                           |          | 0.000          | 0.000      | 0.905   |
| s(C221)                                                           |          | 2.529          | 31.753     | < 0.001 |
| s(C222)                                                           |          | 0.002          | 0.000      | 0.968   |
| s(C223)                                                           |          | 0.004          | 0.003      | 0.350   |
| s(C224)                                                           |          | 0.000          | 0.000      | 0.507   |
| s(C231)                                                           |          | 1.971          | 64.175     | < 0.001 |
| s(C311)                                                           |          | 2.105          | 30.630     | < 0.001 |
| s(C312)                                                           |          | 0.838          | 5.439      | 0.010   |
| s(C313)                                                           |          | 0.844          | 4.919      | 0.015   |
| s(C320)                                                           |          | 0.919          | 14.975     | < 0.001 |
| s(C321)                                                           |          | 0.001          | 0.000      | 0.456   |
| s(C330)                                                           |          | 0.001          | 0.000      | 0.409   |
| s(C410)                                                           |          | 1.562          | 3.312      | 0.115   |
| s(C511)                                                           |          | 0.000          | 0.000      | 0.532   |

| Northern Wheatear ( <i>Oenanthe oenanthe</i> ) — Model C-P-GAM |          |                |         |         |
|----------------------------------------------------------------|----------|----------------|---------|---------|
| Parametric terms                                               | Estimate | Standard error | z-value | p-value |
| Intercept                                                      | −46.028  | 16.412         | −2.805  | 0.005   |
| Year 1995                                                      | −0.007   | 0.621          | −0.011  | 0.991   |
| Year 1996                                                      | −0.253   | 0.637          | −0.397  | 0.691   |
| Year 1999                                                      | −0.584   | 0.646          | −0.904  | 0.366   |
| Year 2000                                                      | −0.869   | 0.618          | −1.407  | 0.159   |
| Year 2001                                                      | −0.631   | 0.630          | −1.001  | 0.317   |
| Year 2002                                                      | −0.914   | 0.634          | −1.442  | 0.149   |
| Year 2003                                                      | −1.308   | 0.635          | −2.058  | 0.040   |
| Year 2004                                                      | −1.120   | 0.639          | −1.753  | 0.080   |
| Year 2005                                                      | −0.325   | 0.601          | −0.541  | 0.589   |
| Year 2006                                                      | −0.411   | 0.611          | −0.672  | 0.502   |
| Year 2007                                                      | −0.383   | 0.611          | −0.626  | 0.531   |
| Year 2008                                                      | −0.400   | 0.608          | −0.658  | 0.510   |
| Year 2009                                                      | −0.153   | 0.603          | −0.253  | 0.800   |
| Year 2010                                                      | −0.210   | 0.608          | −0.346  | 0.729   |
| Year 2011                                                      | −0.170   | 0.608          | −0.279  | 0.780   |
| Year 2012                                                      | −0.494   | 0.605          | −0.817  | 0.414   |
| Year 2013                                                      | −0.393   | 0.609          | −0.646  | 0.518   |
| Year 2014                                                      | −0.511   | 0.608          | −0.840  | 0.401   |
| Year 2015                                                      | −0.371   | 0.606          | −0.611  | 0.541   |
| Year 2016                                                      | −0.764   | 0.619          | −1.234  | 0.217   |
| Year 2017                                                      | −0.733   | 0.617          | −1.188  | 0.235   |
| Year 2018                                                      | −0.824   | 0.621          | −1.327  | 0.184   |
| Year 2019                                                      | −0.973   | 0.626          | −1.554  | 0.120   |
| Sin                                                            | −0.096   | 0.064          | −1.504  | 0.132   |
| Cos                                                            | −0.120   | 0.097          | −1.245  | 0.213   |
| Smooth terms                                                   | edf      | Chi square     | p-value |         |
| s(X,Y)                                                         | 1.971    | 80.389         | < 0.001 |         |
| s(Elevation)                                                   | 2.838    | 91.077         | < 0.001 |         |
| s(Slope)                                                       | 1.647    | 26.696         | < 0.001 |         |
| s(C110)                                                        | 0.002    | 0.000          | 0.930   |         |
| s(C112)                                                        | 1.890    | 6.191          | 0.034   |         |
| s(C211)                                                        | 0.661    | 0.703          | 0.302   |         |
| s(C213)                                                        | 0.000    | 0.000          | 1.000   |         |
| s(C221)                                                        | 1.258    | 15.182         | < 0.001 |         |
| s(C222)                                                        | 0.000    | 0.000          | 0.929   |         |
| s(C223)                                                        | 0.000    | 0.000          | 0.967   |         |
| s(C224)                                                        | 0.001    | 0.000          | 0.755   |         |
| s(C231)                                                        | 0.001    | 0.001          | 0.315   |         |
| s(C311)                                                        | 1.054    | 15.231         | < 0.001 |         |
| s(C312)                                                        | 2.455    | 50.942         | < 0.001 |         |
| s(C313)                                                        | 0.960    | 13.382         | < 0.001 |         |
| s(C320)                                                        | 2.072    | 5.880          | 0.041   |         |
| s(C321)                                                        | 1.779    | 22.435         | < 0.001 |         |
| s(C330)                                                        | 2.350    | 4.676          | 0.106   |         |
| s(C410)                                                        | 0.002    | 0.001          | 0.560   |         |
| s(C511)                                                        | 0.772    | 3.066          | 0.046   |         |

| Common Blackbird ( <i>Turdus merula</i> ) — Model C-ZIP-GAM |          |                |            |         |
|-------------------------------------------------------------|----------|----------------|------------|---------|
| Binomial component                                          |          |                |            |         |
| Parametric terms                                            | Estimate | Standard error | z-value    | p-value |
| Intercept                                                   | 6.102    | 0.186          | 32.800     | < 0.001 |
| Smooth terms                                                |          | edf            | Chi square | p-value |
| s(Elevation)                                                |          | 2.973          | 614.400    | < 0.001 |
| s(Urb <sub>2500</sub> )                                     |          | 1.019          | 417.700    | < 0.001 |
| s(For <sub>2500</sub> )                                     |          | 2.970          | 300.700    | < 0.001 |
| Count component                                             |          |                |            |         |
| Parametric terms                                            | Estimate | Standard error | z-value    | p-value |
| Intercept                                                   | 0.341    | 0.042          | 8.152      | < 0.001 |
| Year 1995                                                   | −0.366   | 0.055          | −6.632     | < 0.001 |
| Year 1996                                                   | −0.437   | 0.055          | −7.916     | < 0.001 |
| Year 1999                                                   | −0.150   | 0.048          | −3.133     | 0.002   |
| Year 2000                                                   | −0.465   | 0.048          | −9.701     | < 0.001 |
| Year 2001                                                   | −0.382   | 0.051          | −7.435     | < 0.001 |
| Year 2002                                                   | −0.410   | 0.057          | −7.158     | < 0.001 |
| Year 2003                                                   | −0.517   | 0.061          | −8.534     | < 0.001 |
| Year 2004                                                   | −0.671   | 0.071          | −9.442     | < 0.001 |
| Year 2005                                                   | −0.514   | 0.052          | −9.936     | < 0.001 |
| Year 2006                                                   | −0.491   | 0.050          | −9.765     | < 0.001 |
| Year 2007                                                   | −0.434   | 0.055          | −7.909     | < 0.001 |
| Year 2008                                                   | −0.442   | 0.055          | −7.980     | < 0.001 |
| Year 2009                                                   | −0.242   | 0.052          | −4.618     | < 0.001 |
| Year 2010                                                   | −0.300   | 0.053          | −5.690     | < 0.001 |
| Year 2011                                                   | −0.339   | 0.051          | −6.710     | < 0.001 |
| Year 2012                                                   | −0.337   | 0.053          | −6.384     | < 0.001 |
| Year 2013                                                   | −0.290   | 0.052          | −5.547     | < 0.001 |
| Year 2014                                                   | −0.312   | 0.051          | −6.165     | < 0.001 |
| Year 2015                                                   | −0.284   | 0.052          | −5.487     | < 0.001 |
| Year 2016                                                   | −0.176   | 0.051          | −3.453     | < 0.001 |
| Year 2017                                                   | −0.102   | 0.054          | −1.880     | 0.060   |
| Year 2018                                                   | −0.161   | 0.055          | −2.936     | 0.003   |
| Year 2019                                                   | −0.125   | 0.054          | −2.308     | 0.021   |
| Sin                                                         | 0.002    | 0.011          | 0.213      | 0.831   |
| Cos                                                         | −0.018   | 0.016          | −1.124     | 0.261   |
| Smooth terms                                                |          | edf            | Chi square | p-value |
| s(X, Y)                                                     |          | 2.741          | 18.702     | < 0.001 |
| s(Elevation)                                                |          | 2.940          | 517.923    | < 0.001 |
| s(Slope)                                                    |          | 2.787          | 71.669     | < 0.001 |
| s(C110)                                                     |          | 1.117          | 31.062     | < 0.001 |
| s(C112)                                                     |          | 2.793          | 14.185     | 0.001   |
| s(C211)                                                     |          | 2.436          | 48.299     | < 0.001 |
| s(C213)                                                     |          | 1.460          | 114.755    | < 0.001 |
| s(C221)                                                     |          | 2.670          | 13.395     | 0.002   |
| s(C222)                                                     |          | 0.004          | 0.004      | 0.288   |
| s(C223)                                                     |          | 0.531          | 1.258      | 0.123   |
| s(C224)                                                     |          | 0.466          | 1.174      | 0.110   |
| s(C231)                                                     |          | 2.841          | 11.630     | 0.005   |
| s(C311)                                                     |          | 2.483          | 45.685     | < 0.001 |
| s(C312)                                                     |          | 1.776          | 15.874     | < 0.001 |
| s(C313)                                                     |          | 2.314          | 22.360     | < 0.001 |
| s(C320)                                                     |          | 1.913          | 9.153      | 0.006   |
| s(C321)                                                     |          | 2.942          | 41.454     | < 0.001 |
| s(C330)                                                     |          | 0.967          | 22.912     | < 0.001 |
| s(C410)                                                     |          | 0.001          | 0.000      | 0.474   |
| s(C511)                                                     |          | 2.049          | 15.411     | < 0.001 |

| Song Thrush ( <i>Turdus philomelos</i> ) — Model C-ZIP-GAM |          |                |            |         |
|------------------------------------------------------------|----------|----------------|------------|---------|
| Binomial component                                         |          |                |            |         |
| Parametric terms                                           | Estimate | Standard error | z-value    | p-value |
| Intercept                                                  | −3.425   | 0.084          | −40.980    | < 0.001 |
| Smooth terms                                               |          | edf            | Chi square | p-value |
| s(Elevation)                                               |          | 1.314          | 2405.000   | < 0.001 |
| s(Urb <sub>2500</sub> )                                    |          | 0.000          | 0.000      | 0.564   |
| s(For <sub>2500</sub> )                                    |          | 2.996          | 1408.000   | < 0.001 |
| Count component                                            |          |                |            |         |
| Parametric terms                                           | Estimate | Standard error | z-value    | p-value |
| Intercept                                                  | −4.322   | 0.822          | −5.259     | < 0.001 |
| Year 1995                                                  | 1.274    | 0.564          | 2.259      | 0.024   |
| Year 1996                                                  | 0.294    | 0.629          | 0.468      | 0.640   |
| Year 1999                                                  | 1.321    | 0.519          | 2.544      | 0.011   |
| Year 2000                                                  | 1.060    | 0.519          | 2.041      | 0.041   |
| Year 2001                                                  | 1.449    | 0.521          | 2.783      | 0.005   |
| Year 2002                                                  | 1.540    | 0.532          | 2.897      | 0.004   |
| Year 2003                                                  | 1.706    | 0.526          | 3.245      | 0.001   |
| Year 2004                                                  | 1.170    | 0.573          | 2.042      | 0.041   |
| Year 2005                                                  | 1.436    | 0.526          | 2.731      | 0.006   |
| Year 2006                                                  | 1.724    | 0.525          | 3.284      | 0.001   |
| Year 2007                                                  | 1.757    | 0.520          | 3.379      | < 0.001 |
| Year 2008                                                  | 2.142    | 0.516          | 4.153      | < 0.001 |
| Year 2009                                                  | 1.903    | 0.521          | 3.652      | < 0.001 |
| Year 2010                                                  | 1.690    | 0.526          | 3.214      | 0.001   |
| Year 2011                                                  | 1.965    | 0.517          | 3.801      | < 0.001 |
| Year 2012                                                  | 2.103    | 0.516          | 4.077      | < 0.001 |
| Year 2013                                                  | 2.593    | 0.509          | 5.098      | < 0.001 |
| Year 2014                                                  | 2.055    | 0.514          | 3.998      | < 0.001 |
| Year 2015                                                  | 2.300    | 0.512          | 4.491      | < 0.001 |
| Year 2016                                                  | 2.436    | 0.510          | 4.773      | < 0.001 |
| Year 2017                                                  | 2.452    | 0.514          | 4.768      | < 0.001 |
| Year 2018                                                  | 2.590    | 0.513          | 5.049      | < 0.001 |
| Year 2019                                                  | 2.475    | 0.515          | 4.811      | < 0.001 |
| Sin                                                        | −0.007   | 0.039          | −0.174     | 0.862   |
| Cos                                                        | 0.065    | 0.054          | 1.210      | 0.226   |
| Smooth terms                                               |          | edf            | Chi square | p-value |
| s(X, Y)                                                    |          | 2.999          | 114.672    | < 0.001 |
| s(Elevation)                                               |          | 2.254          | 37.870     | < 0.001 |
| s(Slope)                                                   |          | 1.961          | 10.915     | 0.002   |
| s(C110)                                                    |          | 2.795          | 11.671     | 0.005   |
| s(C112)                                                    |          | 1.825          | 3.752      | 0.108   |
| s(C211)                                                    |          | 0.006          | 0.009      | 0.206   |
| s(C213)                                                    |          | 0.000          | 0.000      | 0.530   |
| s(C221)                                                    |          | 0.000          | 0.000      | 0.705   |
| s(C222)                                                    |          | 0.000          | 0.000      | 0.782   |
| s(C223)                                                    |          | 0.608          | 0.163      | 0.605   |
| s(C224)                                                    |          | 0.000          | 0.000      | 0.758   |
| s(C231)                                                    |          | 0.977          | 6.032      | 0.006   |
| s(C311)                                                    |          | 2.718          | 42.245     | < 0.001 |
| s(C312)                                                    |          | 2.297          | 75.536     | < 0.001 |
| s(C313)                                                    |          | 1.232          | 47.050     | < 0.001 |
| s(C320)                                                    |          | 0.855          | 2.588      | 0.067   |
| s(C321)                                                    |          | 2.296          | 21.632     | < 0.001 |
| s(C330)                                                    |          | 0.000          | 0.000      | 0.760   |
| s(C410)                                                    |          | 0.000          | 0.000      | 0.620   |
| s(C511)                                                    |          | 0.000          | 0.000      | 0.350   |

| Mistle Thrush ( <i>Turdus viscivorus</i> ) — Model C-ZIP-GAM |          |                |            |         |
|--------------------------------------------------------------|----------|----------------|------------|---------|
| Binomial component                                           |          |                |            |         |
| Parametric terms                                             | Estimate | Standard error | z-value    | p-value |
| Intercept                                                    | −3.050   | 0.045          | −67.660    | < 0.001 |
| Smooth terms                                                 |          | edf            | Chi square | p-value |
| s(Elevation)                                                 |          | 2.999          | 3103.800   | < 0.001 |
| s(Urb <sub>2500</sub> )                                      |          | 0.000          | 0.000      | 0.888   |
| s(For <sub>2500</sub> )                                      |          | 1.437          | 186.200    | < 0.001 |
| Count component                                              |          |                |            |         |
| Parametric terms                                             | Estimate | Standard error | z-value    | p-value |
| Intercept                                                    | −13.327  | 45.476         | −0.293     | 0.769   |
| Year 1995                                                    | 0.769    | 0.804          | 0.957      | 0.338   |
| Year 1996                                                    | 0.641    | 0.805          | 0.796      | 0.426   |
| Year 1999                                                    | 1.168    | 0.734          | 1.591      | 0.112   |
| Year 2000                                                    | 0.513    | 0.751          | 0.684      | 0.494   |
| Year 2001                                                    | −0.337   | 0.820          | −0.411     | 0.681   |
| Year 2002                                                    | 0.942    | 0.767          | 1.228      | 0.219   |
| Year 2003                                                    | 0.612    | 0.767          | 0.798      | 0.425   |
| Year 2004                                                    | 0.685    | 0.820          | 0.835      | 0.404   |
| Year 2005                                                    | 0.896    | 0.746          | 1.202      | 0.229   |
| Year 2006                                                    | 1.292    | 0.759          | 1.701      | 0.089   |
| Year 2007                                                    | 0.835    | 0.750          | 1.114      | 0.265   |
| Year 2008                                                    | 0.999    | 0.750          | 1.332      | 0.183   |
| Year 2009                                                    | 1.201    | 0.745          | 1.611      | 0.107   |
| Year 2010                                                    | 1.399    | 0.740          | 1.891      | 0.059   |
| Year 2011                                                    | 1.658    | 0.726          | 2.283      | 0.022   |
| Year 2012                                                    | 1.104    | 0.748          | 1.476      | 0.140   |
| Year 2013                                                    | 1.485    | 0.730          | 2.035      | 0.042   |
| Year 2014                                                    | 1.774    | 0.724          | 2.451      | 0.014   |
| Year 2015                                                    | 1.417    | 0.734          | 1.931      | 0.053   |
| Year 2016                                                    | 1.525    | 0.730          | 2.090      | 0.037   |
| Year 2017                                                    | 1.453    | 0.744          | 1.954      | 0.051   |
| Year 2018                                                    | 1.526    | 0.742          | 2.058      | 0.040   |
| Year 2019                                                    | 1.220    | 0.751          | 1.625      | 0.104   |
| Sin                                                          | −0.195   | 0.069          | −2.839     | 0.005   |
| Cos                                                          | 0.127    | 0.097          | 1.300      | 0.194   |
| Smooth terms                                                 |          | edf            | Chi square | p-value |
| s(X, Y)                                                      |          | 1.085          | 2.118      | 0.138   |
| s(Elevation)                                                 |          | 2.754          | 25.728     | < 0.001 |
| s(Slope)                                                     |          | 1.617          | 11.042     | 0.001   |
| s(C110)                                                      |          | 0.000          | 0.000      | 0.692   |
| s(C112)                                                      |          | 0.854          | 3.282      | 0.047   |
| s(C211)                                                      |          | 0.000          | 0.000      | 0.377   |
| s(C213)                                                      |          | 0.002          | 0.000      | 0.741   |
| s(C221)                                                      |          | 0.001          | 0.000      | 0.346   |
| s(C222)                                                      |          | 0.000          | 0.000      | 0.721   |
| s(C223)                                                      |          | 0.000          | 0.000      | 0.875   |
| s(C224)                                                      |          | 0.398          | 0.036      | 0.763   |
| s(C231)                                                      |          | 1.765          | 12.243     | < 0.001 |
| s(C311)                                                      |          | 0.000          | 0.000      | 0.561   |
| s(C312)                                                      |          | 2.803          | 77.756     | < 0.001 |
| s(C313)                                                      |          | 1.694          | 30.072     | < 0.001 |
| s(C320)                                                      |          | 2.466          | 9.793      | 0.008   |
| s(C321)                                                      |          | 2.432          | 20.050     | < 0.001 |
| s(C330)                                                      |          | 0.000          | 0.000      | 0.419   |
| s(C410)                                                      |          | 0.000          | 0.000      | 0.797   |
| s(C511)                                                      |          | 0.003          | 0.003      | 0.331   |

| Cetti's Warbler ( <i>Cettia cetti</i> )—Model C-ZIP-GAM |          |                |            |         |
|---------------------------------------------------------|----------|----------------|------------|---------|
| Binomial component                                      |          |                |            |         |
| Parametric terms                                        | Estimate | Standard error | z-value    | p-value |
| Intercept                                               | −1.328   | 0.026          | −50.340    | < 0.001 |
| Smooth terms                                            |          | edf            | Chi square | p-value |
| s(Elevation)                                            |          | 1.148          | 533.500    | < 0.001 |
| s(Urb <sub>2500</sub> )                                 |          | 2.989          | 1014.300   | < 0.001 |
| s(For <sub>2500</sub> )                                 |          | 2.997          | 863.100    | < 0.001 |
| Count component                                         |          |                |            |         |
| Parametric terms                                        | Estimate | Standard error | z-value    | p-value |
| Intercept                                               | −4.385   | 0.823          | −5.325     | < 0.001 |
| Year 1995                                               | −0.070   | 0.229          | −0.305     | 0.761   |
| Year 1996                                               | 0.138    | 0.245          | 0.565      | 0.572   |
| Year 1999                                               | 0.561    | 0.221          | 2.542      | 0.011   |
| Year 2000                                               | 0.537    | 0.222          | 2.421      | 0.015   |
| Year 2001                                               | 0.925    | 0.216          | 4.284      | < 0.001 |
| Year 2002                                               | −0.069   | 0.298          | −0.230     | 0.818   |
| Year 2003                                               | −0.238   | 0.298          | −0.796     | 0.426   |
| Year 2004                                               | 0.624    | 0.275          | 2.264      | 0.024   |
| Year 2005                                               | 0.419    | 0.219          | 1.913      | 0.056   |
| Year 2006                                               | −0.437   | 0.250          | −1.753     | 0.080   |
| Year 2007                                               | 0.078    | 0.250          | 0.310      | 0.757   |
| Year 2008                                               | 0.438    | 0.241          | 1.820      | 0.069   |
| Year 2009                                               | −0.144   | 0.255          | −0.566     | 0.572   |
| Year 2010                                               | −0.532   | 0.284          | −1.873     | 0.061   |
| Year 2011                                               | −0.187   | 0.260          | −0.721     | 0.471   |
| Year 2012                                               | −0.726   | 0.306          | −2.371     | 0.018   |
| Year 2013                                               | −0.960   | 0.316          | −3.040     | 0.002   |
| Year 2014                                               | −0.834   | 0.322          | −2.592     | 0.010   |
| Year 2015                                               | −0.320   | 0.271          | −1.184     | 0.236   |
| Year 2016                                               | −0.078   | 0.261          | −0.300     | 0.764   |
| Year 2017                                               | −0.595   | 0.303          | −1.967     | 0.049   |
| Year 2018                                               | −0.280   | 0.284          | −0.986     | 0.324   |
| Year 2019                                               | −0.326   | 0.291          | −1.121     | 0.262   |
| Sin                                                     | 0.044    | 0.045          | 0.978      | 0.328   |
| Cos                                                     | −0.179   | 0.069          | −2.576     | 0.010   |
| Smooth terms                                            |          | edf            | Chi square | p-value |
| s(X, Y)                                                 |          | 2.988          | 258.506    | < 0.001 |
| s(Elevation)                                            |          | 2.720          | 78.830     | < 0.001 |
| s(Slope)                                                |          | 2.829          | 10.599     | 0.010   |
| s(C110)                                                 |          | 1.028          | 46.390     | < 0.001 |
| s(C112)                                                 |          | 0.996          | 42.708     | < 0.001 |
| s(C211)                                                 |          | 2.117          | 13.297     | < 0.001 |
| s(C213)                                                 |          | 0.477          | 0.982      | 0.150   |
| s(C221)                                                 |          | 0.856          | 5.460      | 0.011   |
| s(C222)                                                 |          | 0.001          | 0.001      | 0.443   |
| s(C223)                                                 |          | 0.001          | 0.001      | 0.486   |
| s(C224)                                                 |          | 2.004          | 8.385      | 0.010   |
| s(C231)                                                 |          | 0.001          | 0.000      | 0.645   |
| s(C311)                                                 |          | 2.246          | 29.157     | < 0.001 |
| s(C312)                                                 |          | 0.002          | 0.001      | 0.428   |
| s(C313)                                                 |          | 0.828          | 3.154      | 0.050   |
| s(C320)                                                 |          | 2.809          | 29.063     | < 0.001 |
| s(C321)                                                 |          | 0.001          | 0.000      | 0.690   |
| s(C330)                                                 |          | 0.001          | 0.000      | 0.824   |
| s(C410)                                                 |          | 2.880          | 293.059    | < 0.001 |
| s(C511)                                                 |          | 2.375          | 61.413     | < 0.001 |



| <b>Melodius Warbler (<i>Hippolais polyglotta</i>) — Model C-ZIP-GAM</b> |                 |                       |                   |                |
|-------------------------------------------------------------------------|-----------------|-----------------------|-------------------|----------------|
| <b>Binomial component</b>                                               |                 |                       |                   |                |
| <b>Parametric terms</b>                                                 | <b>Estimate</b> | <b>Standard error</b> | <b>z-value</b>    | <b>p-value</b> |
| Intercept                                                               | −1.706          | 0.028                 | −61.690           | < 0.001        |
| <b>Smooth terms</b>                                                     |                 | <b>edf</b>            | <b>Chi square</b> | <b>p-value</b> |
| s(Elevation)                                                            |                 | 2.810                 | 434.730           | < 0.001        |
| s(Urb <sub>2500</sub> )                                                 |                 | 1.050                 | 39.040            | < 0.001        |
| s(For <sub>2500</sub> )                                                 |                 | 2.958                 | 278.180           | < 0.001        |
| <b>Count component</b>                                                  |                 |                       |                   |                |
| <b>Parametric terms</b>                                                 | <b>Estimate</b> | <b>Standard error</b> | <b>z-value</b>    | <b>p-value</b> |
| Intercept                                                               | −3.588          | 0.369                 | −9.721            | < 0.001        |
| Year 1995                                                               | 0.105           | 0.383                 | 0.274             | 0.784          |
| Year 1996                                                               | −0.958          | 0.587                 | −1.633            | 0.103          |
| Year 1999                                                               | 0.589           | 0.347                 | 1.698             | 0.089          |
| Year 2000                                                               | 0.101           | 0.366                 | 0.277             | 0.782          |
| Year 2001                                                               | 0.324           | 0.361                 | 0.895             | 0.371          |
| Year 2002                                                               | 0.400           | 0.385                 | 1.040             | 0.299          |
| Year 2003                                                               | 0.459           | 0.379                 | 1.213             | 0.225          |
| Year 2004                                                               | 0.110           | 0.548                 | 0.202             | 0.840          |
| Year 2005                                                               | 0.132           | 0.368                 | 0.358             | 0.720          |
| Year 2006                                                               | 0.460           | 0.348                 | 1.322             | 0.186          |
| Year 2007                                                               | 0.599           | 0.359                 | 1.671             | 0.095          |
| Year 2008                                                               | 0.732           | 0.383                 | 1.910             | 0.056          |
| Year 2009                                                               | 0.855           | 0.356                 | 2.406             | 0.016          |
| Year 2010                                                               | 0.935           | 0.347                 | 2.696             | 0.007          |
| Year 2011                                                               | 0.920           | 0.343                 | 2.685             | 0.007          |
| Year 2012                                                               | 1.151           | 0.338                 | 3.404             | < 0.001        |
| Year 2013                                                               | 0.965           | 0.345                 | 2.795             | 0.005          |
| Year 2014                                                               | 0.958           | 0.348                 | 2.756             | 0.006          |
| Year 2015                                                               | 1.451           | 0.343                 | 4.229             | < 0.001        |
| Year 2016                                                               | 0.697           | 0.364                 | 1.917             | 0.055          |
| Year 2017                                                               | 0.785           | 0.375                 | 2.093             | 0.036          |
| Year 2018                                                               | 0.847           | 0.376                 | 2.249             | 0.025          |
| Year 2019                                                               | 1.007           | 0.359                 | 2.801             | 0.005          |
| Sin                                                                     | −0.097          | 0.062                 | −1.557            | 0.120          |
| Cos                                                                     | 0.055           | 0.098                 | 0.555             | 0.579          |
| <b>Smooth terms</b>                                                     |                 | <b>edf</b>            | <b>Chi square</b> | <b>p-value</b> |
| s(X, Y)                                                                 |                 | 1.808                 | 26.327            | < 0.001        |
| s(Elevation)                                                            |                 | 2.124                 | 12.038            | 0.001          |
| s(Slope)                                                                |                 | 2.600                 | 5.539             | 0.086          |
| s(C110)                                                                 |                 | 2.866                 | 20.838            | < 0.001        |
| s(C112)                                                                 |                 | 0.973                 | 43.136            | < 0.001        |
| s(C211)                                                                 |                 | 2.202                 | 23.420            | < 0.001        |
| s(C213)                                                                 |                 | 0.951                 | 18.540            | < 0.001        |
| s(C221)                                                                 |                 | 0.895                 | 11.618            | < 0.001        |
| s(C222)                                                                 |                 | 0.001                 | 0.000             | 0.738          |
| s(C223)                                                                 |                 | 0.001                 | 0.001             | 0.402          |
| s(C224)                                                                 |                 | 1.975                 | 8.857             | 0.008          |
| s(C231)                                                                 |                 | 0.000                 | 0.000             | 0.655          |
| s(C311)                                                                 |                 | 2.341                 | 23.101            | < 0.001        |
| s(C312)                                                                 |                 | 0.560                 | 1.181             | 0.145          |
| s(C313)                                                                 |                 | 1.888                 | 4.066             | 0.105          |
| s(C320)                                                                 |                 | 2.270                 | 92.558            | < 0.001        |
| s(C321)                                                                 |                 | 0.000                 | 0.000             | 0.892          |
| s(C330)                                                                 |                 | 1.867                 | 35.193            | < 0.001        |
| s(C410)                                                                 |                 | 1.897                 | 3.395             | 0.157          |
| s(C511)                                                                 |                 | 1.725                 | 14.918            | < 0.001        |

| Lesser Whitethroat ( <i>Curruca curruca</i> ) — Model C-ZIP-GAM |          |                |            |         |
|-----------------------------------------------------------------|----------|----------------|------------|---------|
| Binomial component                                              |          |                |            |         |
| Parametric terms                                                | Estimate | Standard error | z-value    | p-value |
| Intercept                                                       | −3.533   | 0.056          | −62.690    | < 0.001 |
| Smooth terms                                                    |          | edf            | Chi square | p-value |
| s(Elevation)                                                    |          | 2.992          | 2907.300   | < 0.001 |
| s(Urb <sub>2500</sub> )                                         |          | 0.000          | 0.000      | 1.000   |
| s(For <sub>2500</sub> )                                         |          | 2.983          | 175.800    | < 0.001 |
| Count component                                                 |          |                |            |         |
| Parametric terms                                                | Estimate | Standard error | z-value    | p-value |
| Intercept                                                       | −12.104  | 33.019         | −0.367     | 0.714   |
| Year 1995                                                       | −0.350   | 0.605          | −0.579     | 0.562   |
| Year 1996                                                       | −0.521   | 0.621          | −0.838     | 0.402   |
| Year 1999                                                       | −0.096   | 0.545          | −0.176     | 0.860   |
| Year 2000                                                       | −0.295   | 0.556          | −0.530     | 0.596   |
| Year 2001                                                       | 0.185    | 0.552          | 0.335      | 0.738   |
| Year 2002                                                       | −1.289   | 0.771          | −1.673     | 0.094   |
| Year 2003                                                       | −0.426   | 0.576          | −0.739     | 0.460   |
| Year 2004                                                       | −0.669   | 0.635          | −1.054     | 0.292   |
| Year 2005                                                       | −0.276   | 0.546          | −0.506     | 0.613   |
| Year 2006                                                       | −0.021   | 0.568          | −0.037     | 0.970   |
| Year 2007                                                       | 0.526    | 0.532          | 0.989      | 0.323   |
| Year 2008                                                       | −0.110   | 0.543          | −0.203     | 0.839   |
| Year 2009                                                       | −0.147   | 0.548          | −0.269     | 0.788   |
| Year 2010                                                       | 0.158    | 0.538          | 0.294      | 0.769   |
| Year 2011                                                       | 0.332    | 0.531          | 0.624      | 0.533   |
| Year 2012                                                       | 0.295    | 0.534          | 0.553      | 0.581   |
| Year 2013                                                       | 0.173    | 0.534          | 0.323      | 0.746   |
| Year 2014                                                       | 0.282    | 0.533          | 0.530      | 0.596   |
| Year 2015                                                       | −0.043   | 0.535          | −0.080     | 0.936   |
| Year 2016                                                       | 0.245    | 0.530          | 0.461      | 0.645   |
| Year 2017                                                       | 0.153    | 0.540          | 0.283      | 0.777   |
| Year 2018                                                       | 0.069    | 0.543          | 0.128      | 0.899   |
| Year 2019                                                       | −0.005   | 0.544          | −0.008     | 0.993   |
| Sin                                                             | −0.254   | 0.064          | −3.939     | < 0.001 |
| Cos                                                             | −0.117   | 0.086          | −1.355     | 0.176   |
| Smooth terms                                                    |          | edf            | Chi square | p-value |
| s(X, Y)                                                         |          | 1.875          | 26.971     | < 0.001 |
| s(Elevation)                                                    |          | 0.001          | 0.000      | 0.722   |
| s(Slope)                                                        |          | 2.194          | 14.377     | < 0.001 |
| s(C110)                                                         |          | 1.832          | 10.298     | 0.003   |
| s(C112)                                                         |          | 0.916          | 7.685      | 0.003   |
| s(C211)                                                         |          | 0.768          | 2.913      | 0.047   |
| s(C213)                                                         |          | 0.001          | 0.000      | 0.550   |
| s(C221)                                                         |          | 0.610          | 0.355      | 0.445   |
| s(C222)                                                         |          | 0.001          | 0.000      | 0.772   |
| s(C223)                                                         |          | 0.655          | 0.048      | 0.786   |
| s(C224)                                                         |          | 0.384          | 0.066      | 0.679   |
| s(C231)                                                         |          | 1.004          | 8.518      | 0.002   |
| s(C311)                                                         |          | 0.943          | 9.521      | < 0.001 |
| s(C312)                                                         |          | 2.406          | 33.668     | < 0.001 |
| s(C313)                                                         |          | 1.808          | 7.924      | 0.008   |
| s(C320)                                                         |          | 2.357          | 27.009     | < 0.001 |
| s(C321)                                                         |          | 2.930          | 29.635     | < 0.001 |
| s(C330)                                                         |          | 2.775          | 21.759     | < 0.001 |
| s(C410)                                                         |          | 0.007          | 0.008      | 0.289   |
| s(C511)                                                         |          | 0.760          | 2.366      | 0.077   |

| Eurasian Blackcap ( <i>Sylvia atricapilla</i> ) — Model C-ZIP-GAM |          |                |            |         |
|-------------------------------------------------------------------|----------|----------------|------------|---------|
| Binomial component                                                |          |                |            |         |
| Parametric terms                                                  | Estimate | Standard error | z-value    | p-value |
| Intercept                                                         | 8.224    | 0.393          | 20.950     | < 0.001 |
| Smooth terms                                                      |          | edf            | Chi square | p-value |
| s(Elevation)                                                      |          | 2.991          | 1225.920   | < 0.001 |
| s(Urb <sub>2500</sub> )                                           |          | 2.969          | 160.510    | < 0.001 |
| s(For <sub>2500</sub> )                                           |          | 2.549          | 62.870     | < 0.001 |
| Count component                                                   |          |                |            |         |
| Parametric terms                                                  | Estimate | Standard error | z-value    | p-value |
| Intercept                                                         | 0.243    | 0.043          | 5.587      | < 0.001 |
| Year 1995                                                         | −0.248   | 0.056          | −4.450     | < 0.001 |
| Year 1996                                                         | −0.143   | 0.055          | −2.612     | 0.009   |
| Year 1999                                                         | 0.001    | 0.048          | 0.025      | 0.980   |
| Year 2000                                                         | −0.107   | 0.048          | −2.246     | 0.025   |
| Year 2001                                                         | −0.092   | 0.051          | −1.814     | 0.070   |
| Year 2002                                                         | −0.126   | 0.056          | −2.257     | 0.024   |
| Year 2003                                                         | −0.187   | 0.058          | −3.221     | 0.001   |
| Year 2004                                                         | −0.299   | 0.068          | −4.422     | < 0.001 |
| Year 2005                                                         | −0.145   | 0.051          | −2.855     | 0.004   |
| Year 2006                                                         | −0.126   | 0.050          | −2.513     | 0.012   |
| Year 2007                                                         | −0.066   | 0.054          | −1.222     | 0.222   |
| Year 2008                                                         | −0.015   | 0.054          | −0.282     | 0.778   |
| Year 2009                                                         | −0.008   | 0.053          | −0.148     | 0.882   |
| Year 2010                                                         | 0.035    | 0.053          | 0.667      | 0.505   |
| Year 2011                                                         | 0.053    | 0.050          | 1.046      | 0.295   |
| Year 2012                                                         | −0.015   | 0.053          | −0.286     | 0.775   |
| Year 2013                                                         | −0.102   | 0.054          | −1.892     | 0.059   |
| Year 2014                                                         | −0.103   | 0.053          | −1.945     | 0.052   |
| Year 2015                                                         | −0.111   | 0.054          | −2.066     | 0.039   |
| Year 2016                                                         | −0.120   | 0.054          | −2.233     | 0.026   |
| Year 2017                                                         | 0.031    | 0.056          | 0.557      | 0.577   |
| Year 2018                                                         | −0.030   | 0.056          | −0.533     | 0.594   |
| Year 2019                                                         | 0.012    | 0.056          | 0.211      | 0.833   |
| Sin                                                               | −0.010   | 0.010          | −1.050     | 0.294   |
| Cos                                                               | −0.030   | 0.015          | −2.038     | 0.042   |
| Smooth terms                                                      |          | edf            | Chi square | p-value |
| s(X, Y)                                                           |          | 2.952          | 73.506     | < 0.001 |
| s(Elevation)                                                      |          | 2.577          | 206.946    | < 0.001 |
| s(Slope)                                                          |          | 2.815          | 67.971     | < 0.001 |
| s(C110)                                                           |          | 2.655          | 49.698     | < 0.001 |
| s(C112)                                                           |          | 2.927          | 56.104     | < 0.001 |
| s(C211)                                                           |          | 1.754          | 23.568     | < 0.001 |
| s(C213)                                                           |          | 0.000          | 0.000      | 0.652   |
| s(C221)                                                           |          | 2.249          | 8.264      | 0.015   |
| s(C222)                                                           |          | 0.002          | 0.000      | 0.709   |
| s(C223)                                                           |          | 2.542          | 10.151     | 0.008   |
| s(C224)                                                           |          | 1.950          | 97.983     | < 0.001 |
| s(C231)                                                           |          | 0.832          | 7.419      | 0.002   |
| s(C311)                                                           |          | 2.942          | 513.563    | < 0.001 |
| s(C312)                                                           |          | 1.808          | 21.421     | < 0.001 |
| s(C313)                                                           |          | 2.621          | 185.940    | < 0.001 |
| s(C320)                                                           |          | 2.214          | 49.262     | < 0.001 |
| s(C321)                                                           |          | 2.873          | 35.964     | < 0.001 |
| s(C330)                                                           |          | 0.919          | 11.937     | < 0.001 |
| s(C410)                                                           |          | 2.772          | 5.764      | 0.100   |
| s(C511)                                                           |          | 1.966          | 23.925     | < 0.001 |

| Western Bonelli's Warbler ( <i>Phylloscopus bonelli</i> ) — Model C-ZINB-GAM |          |                |            |         |
|------------------------------------------------------------------------------|----------|----------------|------------|---------|
| Binomial component                                                           |          |                |            |         |
| Parametric terms                                                             | Estimate | Standard error | z-value    | p-value |
| Intercept                                                                    | −2.444   | 0.037          | −66.350    | < 0.001 |
| Smooth terms                                                                 |          | edf            | Chi square | p-value |
| s(Elevation)                                                                 |          | 2.920          | 359.300    | < 0.001 |
| s(Urb <sub>2500</sub> )                                                      |          | 1.067          | 144.900    | < 0.001 |
| s(For <sub>2500</sub> )                                                      |          | 2.335          | 114.700    | < 0.001 |
| Count component                                                              |          |                |            |         |
| Parametric terms                                                             | Estimate | Standard error | z-value    | p-value |
| Intercept                                                                    | −5.220   | 4.888          | −1.068     | 0.286   |
| Year 1995                                                                    | 1.184    | 0.351          | 3.371      | < 0.001 |
| Year 1996                                                                    | 0.827    | 0.363          | 2.279      | 0.023   |
| Year 1999                                                                    | 1.285    | 0.321          | 4.006      | < 0.001 |
| Year 2000                                                                    | 1.041    | 0.317          | 3.291      | 0.001   |
| Year 2001                                                                    | 1.148    | 0.329          | 3.486      | < 0.001 |
| Year 2002                                                                    | 1.022    | 0.344          | 2.966      | 0.003   |
| Year 2003                                                                    | 0.883    | 0.350          | 2.523      | 0.012   |
| Year 2004                                                                    | 0.647    | 0.370          | 1.750      | 0.080   |
| Year 2005                                                                    | 1.034    | 0.331          | 3.121      | 0.002   |
| Year 2006                                                                    | 0.533    | 0.361          | 1.476      | 0.140   |
| Year 2007                                                                    | 0.901    | 0.342          | 2.631      | 0.009   |
| Year 2008                                                                    | 1.000    | 0.335          | 2.984      | 0.003   |
| Year 2009                                                                    | 0.728    | 0.353          | 2.064      | 0.039   |
| Year 2010                                                                    | 0.977    | 0.344          | 2.839      | 0.005   |
| Year 2011                                                                    | 0.937    | 0.337          | 2.781      | 0.005   |
| Year 2012                                                                    | 1.170    | 0.333          | 3.508      | < 0.001 |
| Year 2013                                                                    | 1.268    | 0.332          | 3.821      | < 0.001 |
| Year 2014                                                                    | 1.206    | 0.338          | 3.569      | < 0.001 |
| Year 2015                                                                    | 1.236    | 0.338          | 3.661      | < 0.001 |
| Year 2016                                                                    | 1.435    | 0.330          | 4.344      | < 0.001 |
| Year 2017                                                                    | 1.305    | 0.339          | 3.846      | < 0.001 |
| Year 2018                                                                    | 1.179    | 0.345          | 3.414      | < 0.001 |
| Year 2019                                                                    | 1.225    | 0.343          | 3.567      | < 0.001 |
| Sin                                                                          | 0.190    | 0.042          | 4.473      | < 0.001 |
| Cos                                                                          | −0.443   | 0.067          | −6.581     | < 0.001 |
| Smooth terms                                                                 |          | edf            | Chi square | p-value |
| s(X, Y)                                                                      |          | 2.000          | 332.708    | < 0.001 |
| s(Elevation)                                                                 |          | 1.091          | 22.044     | < 0.001 |
| s(Slope)                                                                     |          | 2.827          | 170.716    | < 0.001 |
| s(C110)                                                                      |          | 0.860          | 5.078      | 0.014   |
| s(C112)                                                                      |          | 0.985          | 22.914     | < 0.001 |
| s(C211)                                                                      |          | 0.898          | 5.892      | 0.009   |
| s(C213)                                                                      |          | 0.741          | 0.039      | 0.818   |
| s(C221)                                                                      |          | 0.754          | 2.628      | 0.061   |
| s(C222)                                                                      |          | 0.648          | 1.544      | 0.122   |
| s(C223)                                                                      |          | 0.000          | 0.000      | 0.545   |
| s(C224)                                                                      |          | 0.001          | 0.000      | 0.506   |
| s(C231)                                                                      |          | 0.001          | 0.000      | 0.378   |
| s(C311)                                                                      |          | 1.117          | 23.209     | < 0.001 |
| s(C312)                                                                      |          | 0.002          | 0.000      | 0.842   |
| s(C313)                                                                      |          | 0.262          | 0.349      | 0.236   |
| s(C320)                                                                      |          | 0.937          | 12.215     | < 0.001 |
| s(C321)                                                                      |          | 0.932          | 10.762     | < 0.001 |
| s(C330)                                                                      |          | 0.966          | 23.641     | < 0.001 |
| s(C410)                                                                      |          | 0.000          | 0.000      | 0.768   |
| s(C511)                                                                      |          | 0.973          | 34.796     | < 0.001 |

| Common Chiffchaff ( <i>Phylloscopus collybita</i> ) — Model C-ZIP-GAM |          |                |            |         |
|-----------------------------------------------------------------------|----------|----------------|------------|---------|
| Binomial component                                                    |          |                |            |         |
| Parametric terms                                                      | Estimate | Standard error | z-value    | p-value |
| Intercept                                                             | −0.679   | 0.032          | −21.230    | < 0.001 |
| Smooth terms                                                          |          | edf            | Chi square | p-value |
| s(Elevation)                                                          |          | 2.990          | 2239.300   | < 0.001 |
| s(Urb <sub>2500</sub> )                                               |          | 0.000          | 0.000      | 0.835   |
| s(For <sub>2500</sub> )                                               |          | 2.995          | 968.400    | < 0.001 |
| Count component                                                       |          |                |            |         |
| Parametric terms                                                      | Estimate | Standard error | z-value    | p-value |
| Intercept                                                             | −1.880   | 0.162          | −11.575    | < 0.001 |
| Year 1995                                                             | 0.145    | 0.145          | 1.001      | 0.317   |
| Year 1996                                                             | 0.527    | 0.134          | 3.930      | < 0.001 |
| Year 1999                                                             | 0.077    | 0.125          | 0.615      | 0.538   |
| Year 2000                                                             | −0.090   | 0.123          | −0.728     | 0.466   |
| Year 2001                                                             | −0.055   | 0.132          | −0.415     | 0.678   |
| Year 2002                                                             | −0.390   | 0.145          | −2.685     | 0.007   |
| Year 2003                                                             | −0.230   | 0.142          | −1.619     | 0.105   |
| Year 2004                                                             | −0.107   | 0.151          | −0.709     | 0.478   |
| Year 2005                                                             | −0.396   | 0.139          | −2.853     | 0.004   |
| Year 2006                                                             | −0.499   | 0.147          | −3.394     | < 0.001 |
| Year 2007                                                             | −0.224   | 0.139          | −1.609     | 0.108   |
| Year 2008                                                             | −0.106   | 0.136          | −0.778     | 0.437   |
| Year 2009                                                             | −0.493   | 0.151          | −3.265     | 0.001   |
| Year 2010                                                             | −0.191   | 0.142          | −1.353     | 0.176   |
| Year 2011                                                             | −0.234   | 0.136          | −1.727     | 0.084   |
| Year 2012                                                             | −0.770   | 0.157          | −4.913     | < 0.001 |
| Year 2013                                                             | −0.572   | 0.146          | −3.907     | < 0.001 |
| Year 2014                                                             | −0.423   | 0.144          | −2.948     | 0.003   |
| Year 2015                                                             | −0.203   | 0.137          | −1.475     | 0.140   |
| Year 2016                                                             | −0.114   | 0.134          | −0.848     | 0.397   |
| Year 2017                                                             | −0.380   | 0.148          | −2.574     | 0.010   |
| Year 2018                                                             | −0.409   | 0.149          | −2.735     | 0.006   |
| Year 2019                                                             | −0.341   | 0.148          | −2.305     | 0.021   |
| Sin                                                                   | 0.003    | 0.024          | 0.115      | 0.909   |
| Cos                                                                   | −0.007   | 0.035          | −0.194     | 0.846   |
| Smooth terms                                                          |          | edf            | Chi square | p-value |
| s(X, Y)                                                               |          | 1.938          | 199.344    | < 0.001 |
| s(Elevation)                                                          |          | 2.999          | 187.752    | < 0.001 |
| s(Slope)                                                              |          | 2.206          | 42.085     | < 0.001 |
| s(C110)                                                               |          | 1.020          | 48.577     | < 0.001 |
| s(C112)                                                               |          | 0.987          | 50.352     | < 0.001 |
| s(C211)                                                               |          | 0.933          | 12.981     | < 0.001 |
| s(C213)                                                               |          | 0.863          | 4.100      | 0.029   |
| s(C221)                                                               |          | 0.780          | 3.195      | 0.042   |
| s(C222)                                                               |          | 0.842          | 4.788      | 0.017   |
| s(C223)                                                               |          | 0.796          | 2.820      | 0.060   |
| s(C224)                                                               |          | 0.003          | 0.003      | 0.334   |
| s(C231)                                                               |          | 0.000          | 0.000      | 0.389   |
| s(C311)                                                               |          | 1.976          | 42.642     | < 0.001 |
| s(C312)                                                               |          | 2.426          | 57.767     | < 0.001 |
| s(C313)                                                               |          | 2.455          | 75.281     | < 0.001 |
| s(C320)                                                               |          | 2.065          | 91.614     | < 0.001 |
| s(C321)                                                               |          | 2.800          | 36.050     | < 0.001 |
| s(C330)                                                               |          | 0.905          | 9.699      | < 0.001 |
| s(C410)                                                               |          | 0.671          | 2.327      | 0.062   |
| s(C511)                                                               |          | 2.836          | 36.915     | < 0.001 |

| Goldcrest ( <i>Regulus regulus</i> ) — Model C-ZIP-GAM |          |                |            |         |
|--------------------------------------------------------|----------|----------------|------------|---------|
| Binomial component                                     |          |                |            |         |
| Parametric terms                                       | Estimate | Standard error | z-value    | p-value |
| Intercept                                              | −1.747   | 0.032          | −54.360    | < 0.001 |
| Smooth terms                                           |          | edf            | Chi square | p-value |
| s(Elevation)                                           |          | 2.993          | 3335.700   | < 0.001 |
| s(Urb <sub>2500</sub> )                                |          | 0.002          | 0.000      | 0.787   |
| s(For <sub>2500</sub> )                                |          | 2.372          | 158.900    | < 0.001 |
| Count component                                        |          |                |            |         |
| Parametric terms                                       | Estimate | Standard error | z-value    | p-value |
| Intercept                                              | −17.281  | 50.304         | −0.344     | 0.731   |
| Year 1995                                              | −0.327   | 0.289          | −1.131     | 0.258   |
| Year 1996                                              | 0.480    | 0.238          | 2.012      | 0.044   |
| Year 1999                                              | 0.237    | 0.222          | 1.070      | 0.285   |
| Year 2000                                              | 0.237    | 0.217          | 1.095      | 0.274   |
| Year 2001                                              | 0.187    | 0.226          | 0.826      | 0.409   |
| Year 2002                                              | 0.297    | 0.231          | 1.283      | 0.199   |
| Year 2003                                              | −0.025   | 0.248          | −0.103     | 0.918   |
| Year 2004                                              | −0.539   | 0.330          | −1.635     | 0.102   |
| Year 2005                                              | −0.266   | 0.249          | −1.069     | 0.285   |
| Year 2006                                              | −0.297   | 0.263          | −1.130     | 0.258   |
| Year 2007                                              | −0.011   | 0.240          | −0.046     | 0.963   |
| Year 2008                                              | −0.139   | 0.254          | −0.546     | 0.585   |
| Year 2009                                              | −0.794   | 0.316          | −2.513     | 0.012   |
| Year 2010                                              | −0.147   | 0.255          | −0.577     | 0.564   |
| Year 2011                                              | −0.248   | 0.250          | −0.994     | 0.320   |
| Year 2012                                              | 0.090    | 0.246          | 0.364      | 0.716   |
| Year 2013                                              | −0.478   | 0.262          | −1.821     | 0.069   |
| Year 2014                                              | −0.447   | 0.263          | −1.701     | 0.089   |
| Year 2015                                              | −0.084   | 0.246          | −0.342     | 0.732   |
| Year 2016                                              | −0.355   | 0.251          | −1.414     | 0.157   |
| Year 2017                                              | 0.183    | 0.252          | 0.727      | 0.468   |
| Year 2018                                              | −0.367   | 0.291          | −1.258     | 0.208   |
| Year 2019                                              | −0.687   | 0.322          | −2.134     | 0.033   |
| Sin                                                    | 0.005    | 0.040          | 0.124      | 0.901   |
| Cos                                                    | −0.033   | 0.055          | −0.601     | 0.548   |
| Smooth terms                                           |          | edf            | Chi square | p-value |
| s(X, Y)                                                |          | 2.970          | 72.865     | < 0.001 |
| s(Elevation)                                           |          | 0.867          | 4.433      | 0.019   |
| s(Slope)                                               |          | 2.314          | 8.217      | 0.016   |
| s(C110)                                                |          | 2.521          | 22.495     | < 0.001 |
| s(C112)                                                |          | 1.915          | 5.498      | 0.047   |
| s(C211)                                                |          | 1.814          | 3.307      | 0.160   |
| s(C213)                                                |          | 0.753          | 0.023      | 0.861   |
| s(C221)                                                |          | 0.492          | 0.043      | 0.767   |
| s(C222)                                                |          | 0.001          | 0.001      | 0.432   |
| s(C223)                                                |          | 0.611          | 0.024      | 0.843   |
| s(C224)                                                |          | 0.002          | 0.001      | 0.503   |
| s(C231)                                                |          | 2.768          | 8.453      | 0.025   |
| s(C311)                                                |          | 2.194          | 6.473      | 0.036   |
| s(C312)                                                |          | 2.854          | 155.391    | < 0.001 |
| s(C313)                                                |          | 2.290          | 74.842     | < 0.001 |
| s(C320)                                                |          | 0.001          | 0.000      | 0.885   |
| s(C321)                                                |          | 1.782          | 11.781     | 0.001   |
| s(C330)                                                |          | 0.954          | 19.631     | < 0.001 |
| s(C410)                                                |          | 0.340          | 0.439      | 0.256   |
| s(C511)                                                |          | 0.599          | 1.394      | 0.127   |

| Common Firecrest ( <i>Regulus ignicapilla</i> ) — Model C-ZIP-GAM |          |                |            |         |
|-------------------------------------------------------------------|----------|----------------|------------|---------|
| Binomial component                                                |          |                |            |         |
| Parametric terms                                                  | Estimate | Standard error | z-value    | p-value |
| Intercept                                                         | −1.497   | 0.023          | −66.390    | < 0.001 |
| Smooth terms                                                      |          | edf            | Chi square | p-value |
| s(Elevation)                                                      |          | 2.992          | 787.800    | < 0.001 |
| s(Urb <sub>2500</sub> )                                           |          | 0.002          | 0.000      | 0.918   |
| s(For <sub>2500</sub> )                                           |          | 2.990          | 551.000    | < 0.001 |
| Count component                                                   |          |                |            |         |
| Parametric terms                                                  | Estimate | Standard error | z-value    | p-value |
| Intercept                                                         | −17.761  | 72.373         | −0.245     | 0.806   |
| Year 1995                                                         | 0.755    | 0.416          | 1.814      | 0.070   |
| Year 1996                                                         | −0.015   | 0.448          | −0.033     | 0.974   |
| Year 1999                                                         | −0.090   | 0.398          | −0.225     | 0.822   |
| Year 2000                                                         | 0.442    | 0.375          | 1.177      | 0.239   |
| Year 2001                                                         | 0.696    | 0.386          | 1.803      | 0.071   |
| Year 2002                                                         | 0.375    | 0.400          | 0.937      | 0.349   |
| Year 2003                                                         | 0.041    | 0.425          | 0.096      | 0.924   |
| Year 2004                                                         | 0.170    | 0.460          | 0.370      | 0.711   |
| Year 2005                                                         | 0.442    | 0.400          | 1.107      | 0.268   |
| Year 2006                                                         | 0.179    | 0.407          | 0.440      | 0.660   |
| Year 2007                                                         | 0.643    | 0.394          | 1.633      | 0.102   |
| Year 2008                                                         | 0.549    | 0.399          | 1.376      | 0.169   |
| Year 2009                                                         | 0.246    | 0.428          | 0.575      | 0.566   |
| Year 2010                                                         | 0.615    | 0.400          | 1.537      | 0.124   |
| Year 2011                                                         | 0.861    | 0.383          | 2.246      | 0.025   |
| Year 2012                                                         | −0.160   | 0.426          | −0.377     | 0.706   |
| Year 2013                                                         | 0.874    | 0.386          | 2.265      | 0.023   |
| Year 2014                                                         | 0.797    | 0.388          | 2.053      | 0.040   |
| Year 2015                                                         | 0.986    | 0.381          | 2.590      | 0.010   |
| Year 2016                                                         | 1.161    | 0.376          | 3.091      | 0.002   |
| Year 2017                                                         | 1.247    | 0.390          | 3.198      | 0.001   |
| Year 2018                                                         | 1.315    | 0.392          | 3.354      | < 0.001 |
| Year 2019                                                         | 1.133    | 0.398          | 2.851      | 0.004   |
| Sin                                                               | 0.022    | 0.054          | 0.413      | 0.680   |
| Cos                                                               | −0.208   | 0.076          | −2.723     | 0.006   |
| Smooth terms                                                      |          | edf            | Chi square | p-value |
| s(X, Y)                                                           |          | 2.984          | 98.478     | < 0.001 |
| s(Elevation)                                                      |          | 2.811          | 18.809     | < 0.001 |
| s(Slope)                                                          |          | 2.990          | 78.196     | < 0.001 |
| s(C110)                                                           |          | 0.005          | 0.011      | 0.102   |
| s(C112)                                                           |          | 0.962          | 6.689      | 0.007   |
| s(C211)                                                           |          | 1.045          | 35.230     | < 0.001 |
| s(C213)                                                           |          | 0.760          | 0.070      | 0.762   |
| s(C221)                                                           |          | 0.912          | 6.962      | 0.006   |
| s(C222)                                                           |          | 0.820          | 3.547      | 0.037   |
| s(C223)                                                           |          | 0.000          | 0.000      | 0.570   |
| s(C224)                                                           |          | 0.477          | 0.031      | 0.797   |
| s(C231)                                                           |          | 1.144          | 52.389     | < 0.001 |
| s(C311)                                                           |          | 1.142          | 46.024     | < 0.001 |
| s(C312)                                                           |          | 2.867          | 137.639    | < 0.001 |
| s(C313)                                                           |          | 2.219          | 20.704     | < 0.001 |
| s(C320)                                                           |          | 1.045          | 33.549     | < 0.001 |
| s(C321)                                                           |          | 1.074          | 50.962     | < 0.001 |
| s(C330)                                                           |          | 0.902          | 5.160      | 0.016   |
| s(C410)                                                           |          | 0.896          | 5.573      | 0.013   |
| s(C511)                                                           |          | 0.939          | 12.601     | < 0.001 |

| <b>Spotted Flycatcher (<i>Muscicapa striata</i>) — Model C-P-GAM</b> |                 |                       |                |                |
|----------------------------------------------------------------------|-----------------|-----------------------|----------------|----------------|
| <b>Parametric terms</b>                                              | <b>Estimate</b> | <b>Standard error</b> | <b>z-value</b> | <b>p-value</b> |
| Intercept                                                            | −3.096          | 0.180                 | −17.207        | < 0.001        |
| Year 1995                                                            | −0.581          | 0.249                 | −2.339         | 0.019          |
| Year 1996                                                            | −0.924          | 0.272                 | −3.395         | < 0.001        |
| Year 1999                                                            | 0.407           | 0.194                 | 2.096          | 0.036          |
| Year 2000                                                            | 0.186           | 0.191                 | 0.972          | 0.331          |
| Year 2001                                                            | 0.846           | 0.192                 | 4.407          | < 0.001        |
| Year 2002                                                            | 0.488           | 0.211                 | 2.316          | 0.021          |
| Year 2003                                                            | 0.125           | 0.228                 | 0.547          | 0.585          |
| Year 2004                                                            | −0.014          | 0.266                 | −0.052         | 0.958          |
| Year 2005                                                            | 0.121           | 0.203                 | 0.596          | 0.551          |
| Year 2006                                                            | 0.330           | 0.197                 | 1.679          | 0.093          |
| Year 2007                                                            | 0.487           | 0.206                 | 2.363          | 0.018          |
| Year 2008                                                            | 0.753           | 0.198                 | 3.808          | < 0.001        |
| Year 2009                                                            | 0.519           | 0.203                 | 2.549          | 0.011          |
| Year 2010                                                            | 0.211           | 0.211                 | 1.000          | 0.317          |
| Year 2011                                                            | 0.682           | 0.192                 | 3.551          | < 0.001        |
| Year 2012                                                            | 1.026           | 0.190                 | 5.392          | < 0.001        |
| Year 2013                                                            | 0.912           | 0.194                 | 4.708          | < 0.001        |
| Year 2014                                                            | 0.877           | 0.192                 | 4.578          | < 0.001        |
| Year 2015                                                            | 0.705           | 0.196                 | 3.594          | < 0.001        |
| Year 2016                                                            | 0.759           | 0.195                 | 3.891          | < 0.001        |
| Year 2017                                                            | 1.137           | 0.194                 | 5.860          | < 0.001        |
| Year 2018                                                            | 0.808           | 0.201                 | 4.024          | < 0.001        |
| Year 2019                                                            | 0.931           | 0.198                 | 4.713          | < 0.001        |
| Sin                                                                  | −0.030          | 0.030                 | −0.975         | 0.330          |
| Cos                                                                  | −0.033          | 0.046                 | −0.722         | 0.470          |
| <b>Smooth terms</b>                                                  | <b>edf</b>      | <b>Chi square</b>     | <b>p-value</b> |                |
| s(X,Y)                                                               | 2.991           | 302.316               | < 0.001        |                |
| s(Elevation)                                                         | 2.739           | 101.454               | < 0.001        |                |
| s(Slope)                                                             | 2.471           | 32.920                | < 0.001        |                |
| s(C110)                                                              | 0.635           | 2.506                 | 0.032          |                |
| s(C112)                                                              | 1.691           | 12.669                | < 0.001        |                |
| s(C211)                                                              | 0.992           | 32.287                | < 0.001        |                |
| s(C213)                                                              | 0.937           | 15.935                | < 0.001        |                |
| s(C221)                                                              | 0.858           | 9.394                 | < 0.001        |                |
| s(C222)                                                              | 0.018           | 0.015                 | 0.361          |                |
| s(C223)                                                              | 0.917           | 14.974                | < 0.001        |                |
| s(C224)                                                              | 0.000           | 0.000                 | 0.459          |                |
| s(C231)                                                              | 2.241           | 10.438                | 0.002          |                |
| s(C311)                                                              | 2.736           | 44.717                | < 0.001        |                |
| s(C312)                                                              | 2.503           | 12.527                | 0.002          |                |
| s(C313)                                                              | 2.128           | 11.300                | 0.001          |                |
| s(C320)                                                              | 0.002           | 0.000                 | 0.603          |                |
| s(C321)                                                              | 0.890           | 11.502                | < 0.001        |                |
| s(C330)                                                              | 0.806           | 4.328                 | 0.019          |                |
| s(C410)                                                              | 1.774           | 4.493                 | 0.070          |                |
| s(C511)                                                              | 1.839           | 4.244                 | 0.090          |                |



| Long-tailed Tit ( <i>Aegithalos caudatus</i> ) — Model C-P-GAM |          |                |            |         |
|----------------------------------------------------------------|----------|----------------|------------|---------|
| Parametric terms                                               | Estimate | Standard error | z-value    | p-value |
| Intercept                                                      | −4.025   | 0.293          | −13.755    | < 0.001 |
| Year 1995                                                      | 0.912    | 0.321          | 2.837      | 0.005   |
| Year 1996                                                      | 0.359    | 0.344          | 1.045      | 0.296   |
| Year 1999                                                      | 0.825    | 0.305          | 2.707      | 0.007   |
| Year 2000                                                      | 0.456    | 0.307          | 1.485      | 0.138   |
| Year 2001                                                      | 1.233    | 0.306          | 4.026      | < 0.001 |
| Year 2002                                                      | 0.974    | 0.320          | 3.039      | 0.002   |
| Year 2003                                                      | 0.858    | 0.330          | 2.600      | 0.009   |
| Year 2004                                                      | 0.708    | 0.360          | 1.966      | 0.049   |
| Year 2005                                                      | 0.614    | 0.319          | 1.922      | 0.055   |
| Year 2006                                                      | 0.900    | 0.307          | 2.928      | 0.003   |
| Year 2007                                                      | 1.098    | 0.317          | 3.459      | < 0.001 |
| Year 2008                                                      | 1.007    | 0.321          | 3.138      | 0.002   |
| Year 2009                                                      | 0.683    | 0.330          | 2.068      | 0.039   |
| Year 2010                                                      | 0.643    | 0.331          | 1.941      | 0.052   |
| Year 2011                                                      | 1.283    | 0.307          | 4.181      | < 0.001 |
| Year 2012                                                      | 0.927    | 0.321          | 2.886      | 0.004   |
| Year 2013                                                      | 0.947    | 0.322          | 2.942      | 0.003   |
| Year 2014                                                      | 1.163    | 0.314          | 3.706      | < 0.001 |
| Year 2015                                                      | 1.186    | 0.315          | 3.767      | < 0.001 |
| Year 2016                                                      | 0.999    | 0.321          | 3.117      | 0.002   |
| Year 2017                                                      | 1.542    | 0.313          | 4.930      | < 0.001 |
| Year 2018                                                      | 0.858    | 0.334          | 2.572      | 0.010   |
| Year 2019                                                      | 1.020    | 0.328          | 3.114      | 0.002   |
| Sin                                                            | −0.084   | 0.040          | −2.109     | 0.035   |
| Cos                                                            | 0.004    | 0.059          | 0.075      | 0.940   |
| Smooth terms                                                   |          | edf            | Chi square | p-value |
| s(X,Y)                                                         |          | 0.003          | 0.003      | 0.369   |
| s(Elevation)                                                   |          | 2.219          | 67.388     | < 0.001 |
| s(Slope)                                                       |          | 2.871          | 18.680     | < 0.001 |
| s(C110)                                                        |          | 0.001          | 0.001      | 0.453   |
| s(C112)                                                        |          | 0.955          | 17.269     | < 0.001 |
| s(C211)                                                        |          | 2.215          | 13.138     | < 0.001 |
| s(C213)                                                        |          | 0.869          | 7.351      | 0.003   |
| s(C221)                                                        |          | 0.056          | 0.059      | 0.307   |
| s(C222)                                                        |          | 0.002          | 0.001      | 0.543   |
| s(C223)                                                        |          | 0.005          | 0.001      | 0.648   |
| s(C224)                                                        |          | 0.003          | 0.002      | 0.421   |
| s(C231)                                                        |          | 1.734          | 7.360      | 0.011   |
| s(C311)                                                        |          | 2.691          | 226.157    | < 0.001 |
| s(C312)                                                        |          | 1.778          | 35.482     | < 0.001 |
| s(C313)                                                        |          | 2.039          | 77.152     | < 0.001 |
| s(C320)                                                        |          | 0.869          | 8.040      | 0.002   |
| s(C321)                                                        |          | 0.734          | 3.286      | 0.032   |
| s(C330)                                                        |          | 0.002          | 0.000      | 0.702   |
| s(C410)                                                        |          | 0.887          | 9.246      | 0.001   |
| s(C511)                                                        |          | 0.963          | 20.142     | < 0.001 |

| Marsh Tit ( <i>Poecile palustris</i> )—Model C-ZIP-GAM |          |                |            |         |
|--------------------------------------------------------|----------|----------------|------------|---------|
| Binomial component                                     |          |                |            |         |
| Parametric terms                                       | Estimate | Standard error | z-value    | p-value |
| Intercept                                              | −2.118   | 0.042          | −50.010    | < 0.001 |
| Smooth terms                                           |          | edf            | Chi square | p-value |
| s(Elevation)                                           |          | 2.984          | 750.600    | < 0.001 |
| s(Urb <sub>2500</sub> )                                |          | 2.978          | 538.200    | < 0.001 |
| s(For <sub>2500</sub> )                                |          | 2.985          | 1006.400   | < 0.001 |
| Count component                                        |          |                |            |         |
| Parametric terms                                       | Estimate | Standard error | z-value    | p-value |
| Intercept                                              | −3.897   | 0.388          | −10.031    | < 0.001 |
| Year 1995                                              | 1.045    | 0.430          | 2.429      | 0.015   |
| Year 1996                                              | 0.491    | 0.459          | 1.071      | 0.284   |
| Year 1999                                              | 1.040    | 0.395          | 2.636      | 0.008   |
| Year 2000                                              | 0.642    | 0.398          | 1.614      | 0.106   |
| Year 2001                                              | 1.506    | 0.400          | 3.764      | < 0.001 |
| Year 2002                                              | 1.631    | 0.398          | 4.096      | < 0.001 |
| Year 2003                                              | 1.482    | 0.407          | 3.644      | < 0.001 |
| Year 2004                                              | 1.706    | 0.412          | 4.145      | < 0.001 |
| Year 2005                                              | 1.278    | 0.406          | 3.151      | 0.002   |
| Year 2006                                              | 1.386    | 0.395          | 3.511      | < 0.001 |
| Year 2007                                              | 1.677    | 0.399          | 4.200      | < 0.001 |
| Year 2008                                              | 1.420    | 0.408          | 3.482      | < 0.001 |
| Year 2009                                              | 1.826    | 0.397          | 4.599      | < 0.001 |
| Year 2010                                              | 1.848    | 0.400          | 4.620      | < 0.001 |
| Year 2011                                              | 2.331    | 0.387          | 6.022      | < 0.001 |
| Year 2012                                              | 1.760    | 0.399          | 4.416      | < 0.001 |
| Year 2013                                              | 1.730    | 0.399          | 4.333      | < 0.001 |
| Year 2014                                              | 1.927    | 0.394          | 4.894      | < 0.001 |
| Year 2015                                              | 1.558    | 0.402          | 3.874      | < 0.001 |
| Year 2016                                              | 1.644    | 0.401          | 4.104      | < 0.001 |
| Year 2017                                              | 1.439    | 0.411          | 3.502      | < 0.001 |
| Year 2018                                              | 1.554    | 0.407          | 3.815      | < 0.001 |
| Year 2019                                              | 1.951    | 0.399          | 4.887      | < 0.001 |
| Sin                                                    | 0.059    | 0.038          | 1.536      | 0.124   |
| Cos                                                    | 0.234    | 0.053          | 4.392      | < 0.001 |
| Smooth terms                                           |          | edf            | Chi square | p-value |
| s(X, Y)                                                |          | 2.992          | 194.740    | < 0.001 |
| s(Elevation)                                           |          | 0.423          | 0.612      | 0.225   |
| s(Slope)                                               |          | 0.001          | 0.000      | 0.509   |
| s(C110)                                                |          | 0.604          | 2.558      | 0.035   |
| s(C112)                                                |          | 0.001          | 0.001      | 0.396   |
| s(C211)                                                |          | 1.723          | 7.268      | 0.012   |
| s(C213)                                                |          | 0.000          | 0.000      | 0.501   |
| s(C221)                                                |          | 0.000          | 0.000      | 0.879   |
| s(C222)                                                |          | 0.000          | 0.000      | 0.871   |
| s(C223)                                                |          | 0.000          | 0.000      | 0.634   |
| s(C224)                                                |          | 0.000          | 0.000      | 0.670   |
| s(C231)                                                |          | 1.297          | 13.503     | < 0.001 |
| s(C311)                                                |          | 2.415          | 293.817    | < 0.001 |
| s(C312)                                                |          | 1.021          | 30.814     | < 0.001 |
| s(C313)                                                |          | 1.858          | 266.747    | < 0.001 |
| s(C320)                                                |          | 0.362          | 0.574      | 0.201   |
| s(C321)                                                |          | 0.000          | 0.000      | 0.443   |
| s(C330)                                                |          | 0.770          | 3.551      | 0.031   |
| s(C410)                                                |          | 0.000          | 0.000      | 0.923   |
| s(C511)                                                |          | 0.000          | 0.000      | 0.919   |

| Willow Tit ( <i>Poecile montanus</i> ) — Model C-ZIP-GAM |          |                |            |         |
|----------------------------------------------------------|----------|----------------|------------|---------|
| Binomial component                                       |          |                |            |         |
| Parametric terms                                         | Estimate | Standard error | z-value    | p-value |
| Intercept                                                | −3.750   | 0.067          | −55.560    | < 0.001 |
| Smooth terms                                             |          | edf            | Chi square | p-value |
| s(Elevation)                                             |          | 2.996          | 1676.880   | < 0.001 |
| s(Urb <sub>2500</sub> )                                  |          | 0.927          | 11.560     | < 0.001 |
| s(For <sub>2500</sub> )                                  |          | 2.990          | 572.420    | < 0.001 |
| Count component                                          |          |                |            |         |
| Parametric terms                                         | Estimate | Standard error | z-value    | p-value |
| Intercept                                                | −38.206  | 53.235         | −0.718     | 0.473   |
| Year 1995                                                | −0.290   | 0.508          | −0.572     | 0.568   |
| Year 1996                                                | −0.555   | 0.540          | −1.029     | 0.304   |
| Year 1999                                                | −0.174   | 0.433          | −0.403     | 0.687   |
| Year 2000                                                | −0.787   | 0.475          | −1.657     | 0.098   |
| Year 2001                                                | 0.691    | 0.408          | 1.692      | 0.091   |
| Year 2002                                                | 0.174    | 0.458          | 0.380      | 0.704   |
| Year 2003                                                | 0.273    | 0.421          | 0.649      | 0.517   |
| Year 2004                                                | −0.246   | 0.500          | −0.493     | 0.622   |
| Year 2005                                                | −0.316   | 0.434          | −0.728     | 0.467   |
| Year 2006                                                | −0.634   | 0.542          | −1.170     | 0.242   |
| Year 2007                                                | 0.112    | 0.429          | 0.260      | 0.795   |
| Year 2008                                                | −0.793   | 0.491          | −1.614     | 0.107   |
| Year 2009                                                | 0.063    | 0.443          | 0.141      | 0.888   |
| Year 2010                                                | 0.117    | 0.432          | 0.271      | 0.787   |
| Year 2011                                                | 0.328    | 0.418          | 0.786      | 0.432   |
| Year 2012                                                | −0.876   | 0.491          | −1.782     | 0.075   |
| Year 2013                                                | 0.282    | 0.420          | 0.671      | 0.503   |
| Year 2014                                                | −0.318   | 0.439          | −0.724     | 0.469   |
| Year 2015                                                | −0.091   | 0.430          | −0.211     | 0.833   |
| Year 2016                                                | −0.142   | 0.429          | −0.331     | 0.740   |
| Year 2017                                                | −0.168   | 0.459          | −0.367     | 0.714   |
| Year 2018                                                | −0.081   | 0.449          | −0.181     | 0.857   |
| Year 2019                                                | 0.115    | 0.447          | 0.258      | 0.797   |
| Sin                                                      | 0.009    | 0.063          | 0.149      | 0.882   |
| Cos                                                      | 0.044    | 0.084          | 0.521      | 0.602   |
| Smooth terms                                             |          | edf            | Chi square | p-value |
| s(X, Y)                                                  |          | 2.829          | 95.393     | < 0.001 |
| s(Elevation)                                             |          | 0.000          | 0.000      | 0.463   |
| s(Slope)                                                 |          | 0.000          | 0.000      | 0.356   |
| s(C110)                                                  |          | 0.912          | 7.866      | 0.003   |
| s(C112)                                                  |          | 0.918          | 9.441      | 0.001   |
| s(C211)                                                  |          | 0.642          | 0.437      | 0.410   |
| s(C213)                                                  |          | 0.000          | 0.000      | 0.911   |
| s(C221)                                                  |          | 0.000          | 0.000      | 0.650   |
| s(C222)                                                  |          | 0.000          | 0.000      | 0.756   |
| s(C223)                                                  |          | 0.000          | 0.000      | 0.827   |
| s(C224)                                                  |          | 0.001          | 0.000      | 0.864   |
| s(C231)                                                  |          | 1.002          | 25.088     | < 0.001 |
| s(C311)                                                  |          | 0.000          | 0.000      | 0.666   |
| s(C312)                                                  |          | 2.827          | 60.282     | < 0.001 |
| s(C313)                                                  |          | 0.000          | 0.000      | 0.446   |
| s(C320)                                                  |          | 0.000          | 0.000      | 0.748   |
| s(C321)                                                  |          | 2.401          | 30.703     | < 0.001 |
| s(C330)                                                  |          | 0.924          | 6.796      | 0.006   |
| s(C410)                                                  |          | 0.000          | 0.000      | 0.553   |
| s(C511)                                                  |          | 0.857          | 5.673      | 0.010   |

| European Crested Tit ( <i>Lophophanes cristatus</i> ) — Model C-ZIP-GAM |          |                |            |         |
|-------------------------------------------------------------------------|----------|----------------|------------|---------|
| Binomial component                                                      |          |                |            |         |
| Parametric terms                                                        | Estimate | Standard error | z-value    | p-value |
| Intercept                                                               | −2.771   | 0.057          | −48.600    | < 0.001 |
| Smooth terms                                                            |          | edf            | Chi square | p-value |
| s(Elevation)                                                            |          | 2.959          | 1204.730   | < 0.001 |
| s(Urb <sub>2500</sub> )                                                 |          | 0.943          | 14.910     | < 0.001 |
| s(For <sub>2500</sub> )                                                 |          | 2.970          | 593.070    | < 0.001 |
| Count component                                                         |          |                |            |         |
| Parametric terms                                                        | Estimate | Standard error | z-value    | p-value |
| Intercept                                                               | −7.138   | 8.012          | −0.891     | 0.373   |
| Year 1995                                                               | −0.256   | 0.488          | −0.526     | 0.599   |
| Year 1996                                                               | −0.199   | 0.445          | −0.448     | 0.654   |
| Year 1999                                                               | 0.924    | 0.351          | 2.633      | 0.008   |
| Year 2000                                                               | 0.636    | 0.352          | 1.809      | 0.070   |
| Year 2001                                                               | −0.332   | 0.391          | −0.850     | 0.395   |
| Year 2002                                                               | 0.619    | 0.366          | 1.690      | 0.091   |
| Year 2003                                                               | 0.465    | 0.376          | 1.236      | 0.217   |
| Year 2004                                                               | 0.695    | 0.420          | 1.656      | 0.098   |
| Year 2005                                                               | 0.349    | 0.372          | 0.937      | 0.349   |
| Year 2006                                                               | 0.369    | 0.385          | 0.959      | 0.338   |
| Year 2007                                                               | 0.759    | 0.367          | 2.069      | 0.039   |
| Year 2008                                                               | 0.273    | 0.386          | 0.709      | 0.478   |
| Year 2009                                                               | 0.804    | 0.384          | 2.094      | 0.036   |
| Year 2010                                                               | 0.543    | 0.379          | 1.434      | 0.152   |
| Year 2011                                                               | 0.430    | 0.377          | 1.139      | 0.255   |
| Year 2012                                                               | 0.210    | 0.392          | 0.537      | 0.591   |
| Year 2013                                                               | 0.753    | 0.369          | 2.043      | 0.041   |
| Year 2014                                                               | 0.652    | 0.371          | 1.757      | 0.079   |
| Year 2015                                                               | 0.361    | 0.384          | 0.941      | 0.347   |
| Year 2016                                                               | 0.852    | 0.365          | 2.332      | 0.020   |
| Year 2017                                                               | 0.808    | 0.385          | 2.100      | 0.036   |
| Year 2018                                                               | 0.868    | 0.383          | 2.265      | 0.023   |
| Year 2019                                                               | 0.634    | 0.399          | 1.589      | 0.112   |
| Sin                                                                     | 0.075    | 0.050          | 1.517      | 0.129   |
| Cos                                                                     | −0.003   | 0.064          | −0.040     | 0.968   |
| Smooth terms                                                            |          | edf            | Chi square | p-value |
| s(X, Y)                                                                 |          | 1.757          | 15.215     | < 0.001 |
| s(Elevation)                                                            |          | 0.871          | 5.537      | 0.008   |
| s(Slope)                                                                |          | 1.099          | 33.314     | < 0.001 |
| s(C110)                                                                 |          | 1.209          | 22.095     | < 0.001 |
| s(C112)                                                                 |          | 2.768          | 38.612     | < 0.001 |
| s(C211)                                                                 |          | 0.948          | 10.440     | < 0.001 |
| s(C213)                                                                 |          | 0.776          | 0.030      | 0.845   |
| s(C221)                                                                 |          | 0.645          | 0.116      | 0.671   |
| s(C222)                                                                 |          | 0.628          | 0.787      | 0.262   |
| s(C223)                                                                 |          | 0.498          | 0.021      | 0.837   |
| s(C224)                                                                 |          | 0.661          | 1.053      | 0.206   |
| s(C231)                                                                 |          | 0.993          | 21.683     | < 0.001 |
| s(C311)                                                                 |          | 1.080          | 48.107     | < 0.001 |
| s(C312)                                                                 |          | 2.913          | 131.970    | < 0.001 |
| s(C313)                                                                 |          | 0.640          | 6.136      | < 0.001 |
| s(C320)                                                                 |          | 2.909          | 31.260     | < 0.001 |
| s(C321)                                                                 |          | 1.707          | 49.303     | < 0.001 |
| s(C330)                                                                 |          | 0.001          | 0.000      | 0.568   |
| s(C410)                                                                 |          | 0.675          | 1.590      | 0.120   |
| s(C511)                                                                 |          | 0.947          | 19.296     | < 0.001 |

| Coal Tit ( <i>Periparus ater</i> ) — Model C-ZIP-GAM |          |                |            |         |
|------------------------------------------------------|----------|----------------|------------|---------|
| Binomial component                                   |          |                |            |         |
| Parametric terms                                     | Estimate | Standard error | z-value    | p-value |
| Intercept                                            | −1.813   | 0.048          | −37.660    | < 0.001 |
| Smooth terms                                         |          | edf            | Chi square | p-value |
| s(Elevation)                                         |          | 2.992          | 2645.119   | < 0.001 |
| s(Urb <sub>2500</sub> )                              |          | 0.784          | 3.921      | 0.025   |
| s(For <sub>2500</sub> )                              |          | 2.977          | 596.639    | < 0.001 |
| Count component                                      |          |                |            |         |
| Parametric terms                                     | Estimate | Standard error | z-value    | p-value |
| Intercept                                            | −2.247   | 2.547          | −0.882     | 0.378   |
| Year 1995                                            | −0.543   | 0.138          | −3.934     | < 0.001 |
| Year 1996                                            | −0.137   | 0.122          | −1.123     | 0.261   |
| Year 1999                                            | −0.181   | 0.106          | −1.704     | 0.088   |
| Year 2000                                            | −0.416   | 0.106          | −3.939     | < 0.001 |
| Year 2001                                            | −0.112   | 0.108          | −1.037     | 0.300   |
| Year 2002                                            | −0.214   | 0.118          | −1.817     | 0.069   |
| Year 2003                                            | −0.227   | 0.116          | −1.954     | 0.051   |
| Year 2004                                            | −0.250   | 0.136          | −1.835     | 0.067   |
| Year 2005                                            | −0.568   | 0.118          | −4.831     | < 0.001 |
| Year 2006                                            | −0.046   | 0.115          | −0.400     | 0.689   |
| Year 2007                                            | −0.115   | 0.112          | −1.030     | 0.303   |
| Year 2008                                            | −0.603   | 0.125          | −4.842     | < 0.001 |
| Year 2009                                            | −0.620   | 0.133          | −4.663     | < 0.001 |
| Year 2010                                            | −0.310   | 0.120          | −2.585     | 0.010   |
| Year 2011                                            | −0.221   | 0.113          | −1.955     | 0.051   |
| Year 2012                                            | −0.329   | 0.117          | −2.805     | 0.005   |
| Year 2013                                            | −0.232   | 0.113          | −2.058     | 0.040   |
| Year 2014                                            | −0.362   | 0.115          | −3.139     | 0.002   |
| Year 2015                                            | −0.449   | 0.118          | −3.815     | < 0.001 |
| Year 2016                                            | −0.102   | 0.110          | −0.928     | 0.354   |
| Year 2017                                            | −0.191   | 0.122          | −1.561     | 0.118   |
| Year 2018                                            | −0.106   | 0.122          | −0.868     | 0.386   |
| Year 2019                                            | −0.548   | 0.133          | −4.121     | < 0.001 |
| Sin                                                  | −0.019   | 0.020          | −0.960     | 0.337   |
| Cos                                                  | 0.054    | 0.028          | 1.950      | 0.051   |
| Smooth terms                                         |          | edf            | Chi square | p-value |
| s(X, Y)                                              |          | 1.983          | 214.084    | < 0.001 |
| s(Elevation)                                         |          | 2.527          | 93.431     | < 0.001 |
| s(Slope)                                             |          | 2.387          | 17.269     | < 0.001 |
| s(C110)                                              |          | 2.699          | 20.897     | < 0.001 |
| s(C112)                                              |          | 2.065          | 22.912     | < 0.001 |
| s(C211)                                              |          | 1.023          | 17.445     | < 0.001 |
| s(C213)                                              |          | 0.752          | 0.121      | 0.689   |
| s(C221)                                              |          | 0.904          | 8.814      | 0.002   |
| s(C222)                                              |          | 0.872          | 5.747      | 0.010   |
| s(C223)                                              |          | 0.784          | 1.818      | 0.128   |
| s(C224)                                              |          | 0.860          | 4.790      | 0.018   |
| s(C231)                                              |          | 1.562          | 20.596     | < 0.001 |
| s(C311)                                              |          | 2.735          | 25.661     | < 0.001 |
| s(C312)                                              |          | 2.956          | 281.594    | < 0.001 |
| s(C313)                                              |          | 2.513          | 98.128     | < 0.001 |
| s(C320)                                              |          | 2.842          | 27.074     | < 0.001 |
| s(C321)                                              |          | 2.648          | 65.987     | < 0.001 |
| s(C330)                                              |          | 2.848          | 10.926     | 0.009   |
| s(C410)                                              |          | 0.887          | 5.414      | 0.013   |
| s(C511)                                              |          | 0.980          | 23.867     | < 0.001 |

| Eurasian Blue Tit ( <i>Cyanistes caeruleus</i> ) — Model C-ZIP-GAM |          |                |            |         |
|--------------------------------------------------------------------|----------|----------------|------------|---------|
| Binomial component                                                 |          |                |            |         |
| Parametric terms                                                   | Estimate | Standard error | z-value    | p-value |
| Intercept                                                          | −0.432   | 0.022          | −19.920    | < 0.001 |
| Smooth terms                                                       |          | edf            | Chi square | p-value |
| s(Elevation)                                                       |          | 2.796          | 1698.100   | < 0.001 |
| s(Urb <sub>2500</sub> )                                            |          | 2.943          | 306.300    | < 0.001 |
| s(For <sub>2500</sub> )                                            |          | 2.962          | 1448.100   | < 0.001 |
| Count component                                                    |          |                |            |         |
| Parametric terms                                                   | Estimate | Standard error | z-value    | p-value |
| Intercept                                                          | −2.293   | 0.166          | −13.834    | < 0.001 |
| Year 1995                                                          | −0.026   | 0.214          | −0.122     | 0.903   |
| Year 1996                                                          | 0.584    | 0.188          | 3.105      | 0.002   |
| Year 1999                                                          | 0.352    | 0.174          | 2.017      | 0.044   |
| Year 2000                                                          | 0.534    | 0.170          | 3.142      | 0.002   |
| Year 2001                                                          | 0.869    | 0.176          | 4.937      | < 0.001 |
| Year 2002                                                          | 0.608    | 0.184          | 3.306      | < 0.001 |
| Year 2003                                                          | 0.937    | 0.182          | 5.144      | < 0.001 |
| Year 2004                                                          | 0.329    | 0.220          | 1.495      | 0.135   |
| Year 2005                                                          | 0.478    | 0.183          | 2.614      | 0.009   |
| Year 2006                                                          | 0.599    | 0.175          | 3.423      | < 0.001 |
| Year 2007                                                          | 0.620    | 0.184          | 3.374      | < 0.001 |
| Year 2008                                                          | 0.830    | 0.181          | 4.580      | < 0.001 |
| Year 2009                                                          | 0.696    | 0.184          | 3.791      | < 0.001 |
| Year 2010                                                          | 0.819    | 0.182          | 4.500      | < 0.001 |
| Year 2011                                                          | 0.992    | 0.172          | 5.753      | < 0.001 |
| Year 2012                                                          | 0.717    | 0.181          | 3.962      | < 0.001 |
| Year 2013                                                          | 0.621    | 0.182          | 3.406      | < 0.001 |
| Year 2014                                                          | 0.716    | 0.180          | 3.973      | < 0.001 |
| Year 2015                                                          | 0.450    | 0.189          | 2.385      | 0.017   |
| Year 2016                                                          | 0.572    | 0.186          | 3.071      | 0.002   |
| Year 2017                                                          | 0.654    | 0.188          | 3.468      | < 0.001 |
| Year 2018                                                          | 0.418    | 0.196          | 2.136      | 0.033   |
| Year 2019                                                          | 0.423    | 0.196          | 2.154      | 0.031   |
| Sin                                                                | −0.052   | 0.026          | −1.996     | 0.046   |
| Cos                                                                | 0.093    | 0.039          | 2.387      | 0.017   |
| Smooth terms                                                       |          | edf            | Chi square | p-value |
| s(X, Y)                                                            |          | 2.984          | 155.942    | < 0.001 |
| s(Elevation)                                                       |          | 2.372          | 48.588     | < 0.001 |
| S(Slope)                                                           |          | 1.856          | 4.496      | 0.071   |
| s(C110)                                                            |          | 0.979          | 17.841     | < 0.001 |
| s(C112)                                                            |          | 2.833          | 10.779     | 0.009   |
| s(C211)                                                            |          | 2.241          | 30.049     | < 0.001 |
| s(C213)                                                            |          | 0.980          | 19.241     | < 0.001 |
| s(C221)                                                            |          | 2.410          | 16.012     | < 0.001 |
| s(C222)                                                            |          | 0.793          | 6.065      | 0.005   |
| s(C223)                                                            |          | 0.553          | 1.106      | 0.156   |
| s(C224)                                                            |          | 1.864          | 13.713     | < 0.001 |
| s(C231)                                                            |          | 1.765          | 4.958      | 0.041   |
| s(C311)                                                            |          | 2.608          | 69.971     | < 0.001 |
| s(C312)                                                            |          | 1.867          | 8.433      | 0.007   |
| s(C313)                                                            |          | 2.221          | 30.566     | < 0.001 |
| s(C320)                                                            |          | 2.501          | 2.874      | 0.314   |
| s(C321)                                                            |          | 1.414          | 9.298      | 0.003   |
| s(C330)                                                            |          | 0.723          | 2.752      | 0.048   |
| s(C410)                                                            |          | 0.770          | 4.851      | 0.011   |
| s(C511)                                                            |          | 0.000          | 0.000      | 0.902   |

| Great Tit ( <i>Parus major</i> ) — Model C-ZIP-GAM |          |                |            |         |
|----------------------------------------------------|----------|----------------|------------|---------|
| Binomial component                                 |          |                |            |         |
| Parametric terms                                   | Estimate | Standard error | z-value    | p-value |
| Intercept                                          | 3.033    | 0.061          | 49.620     | < 0.001 |
| Smooth terms                                       |          | edf            | Chi square | p-value |
| s(Elevation)                                       |          | 2.941          | 1262.800   | < 0.001 |
| s(Urb <sub>2500</sub> )                            |          | 2.984          | 332.000    | < 0.001 |
| s(For <sub>2500</sub> )                            |          | 2.996          | 829.100    | < 0.001 |
| Count component                                    |          |                |            |         |
| Parametric terms                                   | Estimate | Standard error | z-value    | p-value |
| Intercept                                          | -0.625   | 0.069          | -9.079     | < 0.001 |
| Year 1995                                          | -0.617   | 0.092          | -6.679     | < 0.001 |
| Year 1996                                          | -0.707   | 0.094          | -7.500     | < 0.001 |
| Year 1999                                          | -0.168   | 0.075          | -2.225     | 0.026   |
| Year 2000                                          | -0.512   | 0.077          | -6.661     | < 0.001 |
| Year 2001                                          | -0.280   | 0.080          | -3.509     | < 0.001 |
| Year 2002                                          | -0.437   | 0.092          | -4.755     | < 0.001 |
| Year 2003                                          | -0.021   | 0.086          | -0.244     | 0.807   |
| Year 2004                                          | -0.259   | 0.102          | -2.542     | 0.011   |
| Year 2005                                          | -0.194   | 0.078          | -2.483     | 0.013   |
| Year 2006                                          | -0.152   | 0.076          | -2.007     | 0.045   |
| Year 2007                                          | -0.075   | 0.082          | -0.912     | 0.362   |
| Year 2008                                          | -0.128   | 0.084          | -1.524     | 0.128   |
| Year 2009                                          | -0.027   | 0.081          | -0.332     | 0.740   |
| Year 2010                                          | 0.074    | 0.079          | 0.941      | 0.346   |
| Year 2011                                          | -0.055   | 0.078          | -0.707     | 0.480   |
| Year 2012                                          | -0.060   | 0.081          | -0.738     | 0.460   |
| Year 2013                                          | 0.022    | 0.079          | 0.280      | 0.779   |
| Year 2014                                          | -0.093   | 0.080          | -1.172     | 0.241   |
| Year 2015                                          | -0.015   | 0.080          | -0.185     | 0.853   |
| Year 2016                                          | 0.049    | 0.079          | 0.612      | 0.541   |
| Year 2017                                          | 0.109    | 0.083          | 1.321      | 0.186   |
| Year 2018                                          | 0.124    | 0.082          | 1.511      | 0.131   |
| Year 2019                                          | 0.112    | 0.082          | 1.363      | 0.173   |
| Sin                                                | 0.012    | 0.015          | 0.807      | 0.420   |
| Cos                                                | 0.015    | 0.023          | 0.665      | 0.506   |
| Smooth terms                                       |          | edf            | Chi square | p-value |
| s(X, Y)                                            |          | 2.873          | 71.283     | < 0.001 |
| s(Elevation)                                       |          | 2.934          | 202.019    | < 0.001 |
| s(Slope)                                           |          | 2.356          | 13.474     | < 0.001 |
| s(C110)                                            |          | 1.336          | 4.231      | 0.036   |
| s(C112)                                            |          | 2.223          | 12.596     | 0.001   |
| s(C211)                                            |          | 0.897          | 5.497      | 0.007   |
| s(C213)                                            |          | 0.998          | 23.605     | < 0.001 |
| s(C221)                                            |          | 0.244          | 0.450      | 0.164   |
| s(C222)                                            |          | 0.002          | 0.001      | 0.381   |
| s(C223)                                            |          | 0.001          | 0.001      | 0.427   |
| s(C224)                                            |          | 2.627          | 37.439     | < 0.001 |
| s(C231)                                            |          | 2.748          | 21.450     | < 0.001 |
| s(C311)                                            |          | 2.853          | 204.343    | < 0.001 |
| s(C312)                                            |          | 1.365          | 13.620     | < 0.001 |
| s(C313)                                            |          | 2.285          | 48.279     | < 0.001 |
| s(C320)                                            |          | 0.002          | 0.001      | 0.477   |
| s(C321)                                            |          | 1.999          | 4.977      | 0.070   |
| s(C330)                                            |          | 0.877          | 4.508      | 0.022   |
| s(C410)                                            |          | 0.860          | 4.359      | 0.023   |
| s(C511)                                            |          | 2.699          | 13.864     | 0.002   |

| Eurasian Nuthatch ( <i>Sitta europaea</i> ) — Model C-ZIP-GAM |          |                |            |         |
|---------------------------------------------------------------|----------|----------------|------------|---------|
| Binomial component                                            |          |                |            |         |
| Parametric terms                                              | Estimate | Standard error | z-value    | p-value |
| Intercept                                                     | −2.286   | 0.045          | −50.830    | < 0.001 |
| Smooth terms                                                  |          | edf            | Chi square | p-value |
| s(Elevation)                                                  |          | 2.995          | 604.100    | < 0.001 |
| s(Urb <sub>2500</sub> )                                       |          | 2.996          | 592.900    | < 0.001 |
| s(For <sub>2500</sub> )                                       |          | 2.993          | 888.300    | < 0.001 |
| Count component                                               |          |                |            |         |
| Parametric terms                                              | Estimate | Standard error | z-value    | p-value |
| Intercept                                                     | −2.747   | 0.271          | −10.154    | < 0.001 |
| Year 1995                                                     | −0.299   | 0.350          | −0.853     | 0.393   |
| Year 1996                                                     | −1.232   | 0.434          | −2.838     | 0.005   |
| Year 1999                                                     | 0.240    | 0.272          | 0.883      | 0.377   |
| Year 2000                                                     | −0.144   | 0.276          | −0.522     | 0.601   |
| Year 2001                                                     | 0.328    | 0.285          | 1.151      | 0.250   |
| Year 2002                                                     | 0.292    | 0.290          | 1.008      | 0.313   |
| Year 2003                                                     | −0.079   | 0.333          | −0.236     | 0.813   |
| Year 2004                                                     | −1.285   | 0.481          | −2.670     | 0.008   |
| Year 2005                                                     | −0.038   | 0.306          | −0.123     | 0.902   |
| Year 2006                                                     | 0.423    | 0.280          | 1.510      | 0.131   |
| Year 2007                                                     | −0.097   | 0.319          | −0.303     | 0.762   |
| Year 2008                                                     | −0.146   | 0.327          | −0.446     | 0.656   |
| Year 2009                                                     | 0.070    | 0.307          | 0.229      | 0.819   |
| Year 2010                                                     | −0.248   | 0.344          | −0.720     | 0.471   |
| Year 2011                                                     | 0.253    | 0.293          | 0.863      | 0.388   |
| Year 2012                                                     | 0.372    | 0.295          | 1.264      | 0.206   |
| Year 2013                                                     | −0.291   | 0.340          | −0.857     | 0.391   |
| Year 2014                                                     | 0.260    | 0.296          | 0.879      | 0.380   |
| Year 2015                                                     | −0.081   | 0.317          | −0.256     | 0.798   |
| Year 2016                                                     | −0.292   | 0.344          | −0.848     | 0.397   |
| Year 2017                                                     | 0.154    | 0.324          | 0.474      | 0.635   |
| Year 2018                                                     | −0.392   | 0.367          | −1.070     | 0.285   |
| Year 2019                                                     | 0.253    | 0.317          | 0.799      | 0.424   |
| Sin                                                           | 0.016    | 0.050          | 0.325      | 0.745   |
| Cos                                                           | 0.295    | 0.070          | 4.241      | < 0.001 |
| Smooth terms                                                  |          | edf            | Chi square | p-value |
| s(X, Y)                                                       |          | 2.992          | 130.001    | < 0.001 |
| s(Elevation)                                                  |          | 2.882          | 29.477     | < 0.001 |
| s(Slope)                                                      |          | 0.755          | 2.916      | 0.045   |
| s(C110)                                                       |          | 2.624          | 12.085     | 0.003   |
| s(C112)                                                       |          | 0.003          | 0.001      | 0.648   |
| s(C211)                                                       |          | 0.000          | 0.000      | 0.962   |
| s(C213)                                                       |          | 0.000          | 0.000      | 0.540   |
| s(C221)                                                       |          | 0.002          | 0.001      | 0.385   |
| s(C222)                                                       |          | 0.002          | 0.001      | 0.387   |
| s(C223)                                                       |          | 0.000          | 0.000      | 0.515   |
| s(C224)                                                       |          | 0.000          | 0.000      | 0.439   |
| s(C231)                                                       |          | 0.716          | 2.434      | 0.062   |
| s(C311)                                                       |          | 2.498          | 218.444    | < 0.001 |
| s(C312)                                                       |          | 1.075          | 31.987     | < 0.001 |
| s(C313)                                                       |          | 1.463          | 137.484    | < 0.001 |
| s(C320)                                                       |          | 0.000          | 0.000      | 1.000   |
| s(C321)                                                       |          | 0.000          | 0.000      | 0.952   |
| s(C330)                                                       |          | 2.843          | 19.925     | < 0.001 |
| s(C410)                                                       |          | 0.757          | 2.363      | 0.077   |
| s(C511)                                                       |          | 2.902          | 41.362     | < 0.001 |



| Short-toed Treecreeper ( <i>Certhia brachydactyla</i> ) — Model C-ZIP-GAM |          |                |            |         |
|---------------------------------------------------------------------------|----------|----------------|------------|---------|
| Binomial component                                                        |          |                |            |         |
| Parametric terms                                                          | Estimate | Standard error | z-value    | p-value |
| Intercept                                                                 | −2.663   | 0.049          | −53.940    | < 0.001 |
| Smooth terms                                                              |          | edf            | Chi square | p-value |
| s(Elevation)                                                              |          | 2.988          | 1005.700   | < 0.001 |
| s(Urb <sub>2500</sub> )                                                   |          | 1.114          | 232.800    | < 0.001 |
| s(For <sub>2500</sub> )                                                   |          | 2.973          | 741.600    | < 0.001 |
| Count component                                                           |          |                |            |         |
| Parametric terms                                                          | Estimate | Standard error | z-value    | p-value |
| Intercept                                                                 | −6.025   | 1.011          | −5.961     | < 0.001 |
| Year 1995                                                                 | 0.724    | 1.157          | 0.626      | 0.531   |
| Year 1996                                                                 | 2.033    | 1.016          | 2.001      | 0.045   |
| Year 1999                                                                 | 1.758    | 1.021          | 1.722      | 0.085   |
| Year 2000                                                                 | 1.822    | 1.051          | 1.734      | 0.083   |
| Year 2001                                                                 | 2.707    | 1.019          | 2.657      | 0.008   |
| Year 2002                                                                 | 2.983    | 1.020          | 2.924      | 0.003   |
| Year 2003                                                                 | 2.684    | 1.043          | 2.573      | 0.010   |
| Year 2004                                                                 | 2.202    | 1.034          | 2.129      | 0.033   |
| Year 2005                                                                 | 2.980    | 1.008          | 2.956      | 0.003   |
| Year 2006                                                                 | 2.483    | 1.031          | 2.409      | 0.016   |
| Year 2007                                                                 | 2.741    | 1.028          | 2.666      | 0.008   |
| Year 2008                                                                 | 1.664    | 1.081          | 1.539      | 0.124   |
| Year 2009                                                                 | 2.293    | 1.046          | 2.194      | 0.028   |
| Year 2010                                                                 | 2.883    | 1.019          | 2.828      | 0.005   |
| Year 2011                                                                 | 2.965    | 1.021          | 2.904      | 0.004   |
| Year 2012                                                                 | 3.042    | 1.023          | 2.973      | 0.003   |
| Year 2013                                                                 | 2.937    | 1.021          | 2.877      | 0.004   |
| Year 2014                                                                 | 2.571    | 1.036          | 2.481      | 0.013   |
| Year 2015                                                                 | 2.937    | 1.025          | 2.866      | 0.004   |
| Year 2016                                                                 | 3.004    | 1.027          | 2.925      | 0.003   |
| Year 2017                                                                 | 3.236    | 1.022          | 3.167      | 0.002   |
| Year 2018                                                                 | 3.180    | 1.022          | 3.112      | 0.002   |
| Year 2019                                                                 | 0.065    | 0.069          | 0.941      | 0.347   |
| Sin                                                                       | 0.135    | 0.102          | 1.319      | 0.187   |
| Cos                                                                       | −6.025   | 1.011          | −5.961     | < 0.001 |
| Smooth terms                                                              |          | edf            | Chi square | p-value |
| s(X, Y)                                                                   |          | 2.870          | 114.120    | < 0.001 |
| s(Elevation)                                                              |          | 0.000          | 0.000      | 0.871   |
| s(Slope)                                                                  |          | 2.132          | 22.630     | < 0.001 |
| s(C110)                                                                   |          | 1.685          | 13.536     | < 0.001 |
| s(C112)                                                                   |          | 1.981          | 11.735     | 0.001   |
| s(C211)                                                                   |          | 0.000          | 0.000      | 0.739   |
| s(C213)                                                                   |          | 0.001          | 0.000      | 0.401   |
| s(C221)                                                                   |          | 0.840          | 4.347      | 0.023   |
| s(C222)                                                                   |          | 0.182          | 0.238      | 0.251   |
| s(C223)                                                                   |          | 0.000          | 0.000      | 0.612   |
| s(C224)                                                                   |          | 0.000          | 0.000      | 0.622   |
| s(C231)                                                                   |          | 0.635          | 1.946      | 0.074   |
| s(C311)                                                                   |          | 2.613          | 82.052     | < 0.001 |
| s(C312)                                                                   |          | 1.752          | 20.578     | < 0.001 |
| s(C313)                                                                   |          | 2.098          | 101.850    | < 0.001 |
| s(C320)                                                                   |          | 0.125          | 0.141      | 0.281   |
| s(C321)                                                                   |          | 0.000          | 0.000      | 0.800   |
| s(C330)                                                                   |          | 0.574          | 1.185      | 0.149   |
| s(C410)                                                                   |          | 0.187          | 0.234      | 0.261   |
| s(C511)                                                                   |          | 0.866          | 7.435      | 0.003   |

| Eurasian Golden Oriole ( <i>Oriolus oriolus</i> ) — Model C-ZIP-GAM |          |                |            |         |
|---------------------------------------------------------------------|----------|----------------|------------|---------|
| Binomial component                                                  |          |                |            |         |
| Parametric terms                                                    | Estimate | Standard error | z-value    | p-value |
| Intercept                                                           | −0.683   | 0.022          | −30.830    | < 0.001 |
| Smooth terms                                                        |          | edf            | Chi square | p-value |
| s(Elevation)                                                        |          | 2.949          | 2012.600   | < 0.001 |
| s(Urb <sub>2500</sub> )                                             |          | 1.190          | 1228.600   | < 0.001 |
| s(For <sub>2500</sub> )                                             |          | 2.994          | 818.900    | < 0.001 |
| Count component                                                     |          |                |            |         |
| Parametric terms                                                    | Estimate | Standard error | z-value    | p-value |
| Intercept                                                           | −2.696   | 0.205          | −13.138    | < 0.001 |
| Year 1995                                                           | −0.404   | 0.169          | −2.390     | 0.017   |
| Year 1996                                                           | −0.880   | 0.204          | −4.320     | < 0.001 |
| Year 1999                                                           | −0.557   | 0.154          | −3.617     | < 0.001 |
| Year 2000                                                           | −0.443   | 0.159          | −2.794     | 0.005   |
| Year 2001                                                           | −0.650   | 0.176          | −3.699     | < 0.001 |
| Year 2002                                                           | −0.374   | 0.185          | −2.021     | 0.043   |
| Year 2003                                                           | 0.066    | 0.168          | 0.392      | 0.695   |
| Year 2004                                                           | −0.022   | 0.236          | −0.095     | 0.924   |
| Year 2005                                                           | −0.078   | 0.152          | −0.513     | 0.608   |
| Year 2006                                                           | −0.496   | 0.166          | −2.991     | 0.003   |
| Year 2007                                                           | 0.057    | 0.155          | 0.366      | 0.714   |
| Year 2008                                                           | −0.078   | 0.170          | −0.460     | 0.646   |
| Year 2009                                                           | −0.174   | 0.169          | −1.026     | 0.305   |
| Year 2010                                                           | −0.076   | 0.165          | −0.458     | 0.647   |
| Year 2011                                                           | −0.348   | 0.166          | −2.099     | 0.036   |
| Year 2012                                                           | −0.120   | 0.164          | −0.733     | 0.464   |
| Year 2013                                                           | 0.099    | 0.152          | 0.653      | 0.514   |
| Year 2014                                                           | 0.101    | 0.157          | 0.643      | 0.520   |
| Year 2015                                                           | 0.077    | 0.161          | 0.478      | 0.633   |
| Year 2016                                                           | 0.031    | 0.161          | 0.195      | 0.846   |
| Year 2017                                                           | 0.162    | 0.165          | 0.980      | 0.327   |
| Year 2018                                                           | 0.027    | 0.172          | 0.159      | 0.873   |
| Year 2019                                                           | 0.133    | 0.166          | 0.798      | 0.425   |
| Sin                                                                 | −0.016   | 0.034          | −0.456     | 0.648   |
| Cos                                                                 | 0.063    | 0.052          | 1.223      | 0.221   |
| Smooth terms                                                        |          | edf            | Chi square | p-value |
| s(X, Y)                                                             |          | 2.937          | 188.880    | < 0.001 |
| s(Elevation)                                                        |          | 1.877          | 8.298      | 0.009   |
| s(Slope)                                                            |          | 2.375          | 39.808     | < 0.001 |
| s(C110)                                                             |          | 2.886          | 60.827     | < 0.001 |
| s(C112)                                                             |          | 1.752          | 41.716     | < 0.001 |
| s(C211)                                                             |          | 2.505          | 72.325     | < 0.001 |
| s(C213)                                                             |          | 0.778          | 5.226      | 0.009   |
| s(C221)                                                             |          | 0.001          | 0.000      | 0.840   |
| s(C222)                                                             |          | 0.790          | 3.211      | 0.044   |
| s(C223)                                                             |          | 0.001          | 0.000      | 0.585   |
| s(C224)                                                             |          | 2.944          | 276.559    | < 0.001 |
| s(C231)                                                             |          | 0.001          | 0.000      | 0.729   |
| s(C311)                                                             |          | 2.634          | 145.798    | < 0.001 |
| s(C312)                                                             |          | 0.001          | 0.000      | 0.934   |
| s(C313)                                                             |          | 0.001          | 0.000      | 0.814   |
| s(C320)                                                             |          | 0.548          | 1.291      | 0.124   |
| s(C321)                                                             |          | 0.000          | 0.000      | 0.870   |
| s(C330)                                                             |          | 1.848          | 8.288      | 0.010   |
| s(C410)                                                             |          | 0.006          | 0.005      | 0.358   |
| s(C511)                                                             |          | 0.003          | 0.002      | 0.342   |

| Red-backed Shrike ( <i>Lanius collurio</i> ) — Model C-ZIP-GAM |          |                |            |         |
|----------------------------------------------------------------|----------|----------------|------------|---------|
| Binomial component                                             |          |                |            |         |
| Parametric terms                                               | Estimate | Standard error | z-value    | p-value |
| Intercept                                                      | −0.863   | 0.020          | −42.370    | < 0.001 |
| Smooth terms                                                   |          | edf            | Chi square | p-value |
| s(Elevation)                                                   |          | 2.985          | 1121.200   | < 0.001 |
| s(Urb <sub>2500</sub> )                                        |          | 1.558          | 175.900    | < 0.001 |
| s(For <sub>2500</sub> )                                        |          | 2.970          | 392.100    | < 0.001 |
| Count component                                                |          |                |            |         |
| Parametric terms                                               | Estimate | Standard error | z-value    | p-value |
| Intercept                                                      | −1.488   | 0.153          | −9.757     | < 0.001 |
| Year 1995                                                      | −0.072   | 0.183          | −0.392     | 0.695   |
| Year 1996                                                      | −0.701   | 0.203          | −3.462     | < 0.001 |
| Year 1999                                                      | −0.576   | 0.180          | −3.194     | 0.001   |
| Year 2000                                                      | −0.681   | 0.176          | −3.873     | < 0.001 |
| Year 2001                                                      | −0.387   | 0.180          | −2.153     | 0.031   |
| Year 2002                                                      | −0.881   | 0.227          | −3.889     | < 0.001 |
| Year 2003                                                      | −1.922   | 0.363          | −5.299     | < 0.001 |
| Year 2004                                                      | −1.233   | 0.334          | −3.694     | < 0.001 |
| Year 2005                                                      | −0.843   | 0.196          | −4.299     | < 0.001 |
| Year 2006                                                      | −1.119   | 0.212          | −5.275     | < 0.001 |
| Year 2007                                                      | −0.680   | 0.201          | −3.388     | < 0.001 |
| Year 2008                                                      | −0.917   | 0.221          | −4.141     | < 0.001 |
| Year 2009                                                      | −1.187   | 0.244          | −4.866     | < 0.001 |
| Year 2010                                                      | −0.987   | 0.223          | −4.422     | < 0.001 |
| Year 2011                                                      | −1.608   | 0.251          | −6.413     | < 0.001 |
| Year 2012                                                      | −1.859   | 0.287          | −6.484     | < 0.001 |
| Year 2013                                                      | −1.161   | 0.230          | −5.044     | < 0.001 |
| Year 2014                                                      | −1.323   | 0.248          | −5.338     | < 0.001 |
| Year 2015                                                      | −1.274   | 0.244          | −5.219     | < 0.001 |
| Year 2016                                                      | −1.091   | 0.222          | −4.911     | < 0.001 |
| Year 2017                                                      | −1.632   | 0.294          | −5.548     | < 0.001 |
| Year 2018                                                      | −1.739   | 0.311          | −5.594     | < 0.001 |
| Year 2019                                                      | −2.025   | 0.346          | −5.852     | < 0.001 |
| Sin                                                            | −0.055   | 0.051          | −1.088     | 0.277   |
| Cos                                                            | −0.132   | 0.079          | −1.682     | 0.093   |
| Smooth terms                                                   |          | edf            | Chi square | p-value |
| s(X, Y)                                                        |          | 1.931          | 52.891     | < 0.001 |
| s(Elevation)                                                   |          | 2.320          | 10.213     | 0.004   |
| s(Slope)                                                       |          | 2.078          | 24.021     | < 0.001 |
| s(C110)                                                        |          | 1.506          | 31.453     | < 0.001 |
| s(C112)                                                        |          | 1.758          | 28.458     | < 0.001 |
| s(C211)                                                        |          | 0.000          | 0.000      | 0.866   |
| s(C213)                                                        |          | 0.529          | 1.463      | 0.095   |
| s(C221)                                                        |          | 0.795          | 5.718      | 0.007   |
| s(C222)                                                        |          | 0.001          | 0.000      | 0.481   |
| s(C223)                                                        |          | 0.002          | 0.000      | 0.912   |
| s(C224)                                                        |          | 1.974          | 5.889      | 0.041   |
| s(C231)                                                        |          | 0.990          | 59.606     | < 0.001 |
| s(C311)                                                        |          | 2.344          | 73.707     | < 0.001 |
| s(C312)                                                        |          | 1.379          | 39.741     | < 0.001 |
| s(C313)                                                        |          | 1.977          | 34.830     | < 0.001 |
| s(C320)                                                        |          | 2.494          | 21.804     | < 0.001 |
| s(C321)                                                        |          | 0.008          | 0.007      | 0.348   |
| s(C330)                                                        |          | 0.881          | 7.668      | 0.003   |
| s(C410)                                                        |          | 0.730          | 2.397      | 0.070   |
| s(C511)                                                        |          | 0.108          | 0.123      | 0.283   |

| Eurasian Jay ( <i>Garrulus glandarius</i> ) — Model C-P-GAM |          |                |            |         |
|-------------------------------------------------------------|----------|----------------|------------|---------|
| Parametric terms                                            | Estimate | Standard error | z-value    | p-value |
| Intercept                                                   | −3.949   | 0.235          | −16.772    | < 0.001 |
| Year 1995                                                   | 0.318    | 0.293          | 1.086      | 0.277   |
| Year 1996                                                   | −0.303   | 0.315          | −0.964     | 0.335   |
| Year 1999                                                   | 0.458    | 0.251          | 1.821      | 0.069   |
| Year 2000                                                   | 0.532    | 0.245          | 2.171      | 0.030   |
| Year 2001                                                   | 0.464    | 0.260          | 1.786      | 0.074   |
| Year 2002                                                   | 0.727    | 0.259          | 2.812      | 0.005   |
| Year 2003                                                   | 0.931    | 0.263          | 3.533      | < 0.001 |
| Year 2004                                                   | 0.659    | 0.293          | 2.248      | 0.025   |
| Year 2005                                                   | 0.642    | 0.257          | 2.503      | 0.012   |
| Year 2006                                                   | 0.816    | 0.251          | 3.248      | 0.001   |
| Year 2007                                                   | 0.854    | 0.255          | 3.349      | < 0.001 |
| Year 2008                                                   | 0.588    | 0.269          | 2.186      | 0.029   |
| Year 2009                                                   | 0.800    | 0.260          | 3.074      | 0.002   |
| Year 2010                                                   | 0.614    | 0.266          | 2.303      | 0.021   |
| Year 2011                                                   | 1.013    | 0.250          | 4.057      | < 0.001 |
| Year 2012                                                   | 0.871    | 0.256          | 3.409      | < 0.001 |
| Year 2013                                                   | 1.096    | 0.250          | 4.378      | < 0.001 |
| Year 2014                                                   | 0.925    | 0.255          | 3.631      | < 0.001 |
| Year 2015                                                   | 0.781    | 0.260          | 3.003      | 0.003   |
| Year 2016                                                   | 1.167    | 0.251          | 4.647      | < 0.001 |
| Year 2017                                                   | 1.014    | 0.261          | 3.893      | < 0.001 |
| Year 2018                                                   | 0.946    | 0.263          | 3.594      | < 0.001 |
| Year 2019                                                   | 0.847    | 0.266          | 3.178      | 0.001   |
| Sin                                                         | 0.068    | 0.035          | 1.965      | 0.049   |
| Cos                                                         | −0.072   | 0.051          | −1.400     | 0.161   |
| Smooth terms                                                | edf      |                | Chi square | p-value |
| s(X,Y)                                                      | 2.999    |                | 422.098    | < 0.001 |
| s(Elevation)                                                | 2.692    |                | 161.667    | < 0.001 |
| s(Slope)                                                    | 2.597    |                | 40.981     | < 0.001 |
| s(C110)                                                     | 0.865    |                | 12.151     | < 0.001 |
| s(C112)                                                     | 0.767    |                | 3.796      | 0.020   |
| s(C211)                                                     | 2.006    |                | 6.691      | 0.017   |
| s(C213)                                                     | 0.887    |                | 12.070     | < 0.001 |
| s(C221)                                                     | 0.911    |                | 9.764      | < 0.001 |
| s(C222)                                                     | 0.586    |                | 1.602      | 0.094   |
| s(C223)                                                     | 0.003    |                | 0.002      | 0.421   |
| s(C224)                                                     | 2.837    |                | 18.247     | < 0.001 |
| s(C231)                                                     | 0.919    |                | 24.467     | < 0.001 |
| s(C311)                                                     | 2.735    |                | 77.426     | < 0.001 |
| s(C312)                                                     | 1.831    |                | 69.811     | < 0.001 |
| s(C313)                                                     | 2.255    |                | 62.657     | < 0.001 |
| s(C320)                                                     | 2.618    |                | 6.387      | 0.056   |
| s(C321)                                                     | 0.002    |                | 0.001      | 0.494   |
| s(C330)                                                     | 0.879    |                | 8.041      | 0.002   |
| s(C410)                                                     | 0.256    |                | 0.348      | 0.237   |
| s(C511)                                                     | 2.896    |                | 19.981     | < 0.001 |

| Eurasian Magpie ( <i>Pica pica</i> )—Model C-ZIP-GAM |          |                |            |         |
|------------------------------------------------------|----------|----------------|------------|---------|
| Binomial component                                   |          |                |            |         |
| Parametric terms                                     | Estimate | Standard error | z-value    | p-value |
| Intercept                                            | 0.130    | 0.022          | 5.935      | < 0.001 |
| Smooth terms                                         |          | edf            | Chi square | p-value |
| s(Elevation)                                         |          | 2.832          | 1228.500   | < 0.001 |
| s(Urb <sub>2500</sub> )                              |          | 2.991          | 427.300    | < 0.001 |
| s(For <sub>2500</sub> )                              |          | 2.985          | 496.000    | < 0.001 |
| Count component                                      |          |                |            |         |
| Parametric terms                                     | Estimate | Standard error | z-value    | p-value |
| Intercept                                            | −4.327   | 0.317          | −13.663    | < 0.001 |
| Year 1995                                            | 0.851    | 0.273          | 3.121      | 0.002   |
| Year 1996                                            | 0.280    | 0.280          | 1.000      | 0.317   |
| Year 1999                                            | 0.658    | 0.283          | 2.321      | 0.020   |
| Year 2000                                            | 0.687    | 0.270          | 2.550      | 0.011   |
| Year 2001                                            | 0.675    | 0.270          | 2.500      | 0.012   |
| Year 2002                                            | 1.194    | 0.266          | 4.483      | < 0.001 |
| Year 2003                                            | 1.203    | 0.265          | 4.532      | < 0.001 |
| Year 2004                                            | 0.848    | 0.297          | 2.856      | 0.004   |
| Year 2005                                            | 1.348    | 0.253          | 5.332      | < 0.001 |
| Year 2006                                            | 1.366    | 0.255          | 5.359      | < 0.001 |
| Year 2007                                            | 0.919    | 0.267          | 3.441      | < 0.001 |
| Year 2008                                            | 1.069    | 0.265          | 4.034      | < 0.001 |
| Year 2009                                            | 1.275    | 0.259          | 4.928      | < 0.001 |
| Year 2010                                            | 1.321    | 0.259          | 5.106      | < 0.001 |
| Year 2011                                            | 1.271    | 0.257          | 4.949      | < 0.001 |
| Year 2012                                            | 1.600    | 0.255          | 6.278      | < 0.001 |
| Year 2013                                            | 1.687    | 0.252          | 6.687      | < 0.001 |
| Year 2014                                            | 1.345    | 0.256          | 5.254      | < 0.001 |
| Year 2015                                            | 1.490    | 0.255          | 5.850      | < 0.001 |
| Year 2016                                            | 1.777    | 0.252          | 7.042      | < 0.001 |
| Year 2017                                            | 1.821    | 0.257          | 7.083      | < 0.001 |
| Year 2018                                            | 2.158    | 0.254          | 8.488      | < 0.001 |
| Year 2019                                            | 1.923    | 0.256          | 7.508      | < 0.001 |
| Sin                                                  | −0.027   | 0.029          | −0.929     | 0.353   |
| Cos                                                  | 0.092    | 0.041          | 2.260      | 0.024   |
| Smooth terms                                         |          | edf            | Chi square | p-value |
| s(X, Y)                                              |          | 2.989          | 538.714    | < 0.001 |
| s(Elevation)                                         |          | 2.740          | 23.190     | < 0.001 |
| s(Slope)                                             |          | 2.253          | 49.829     | < 0.001 |
| s(C110)                                              |          | 2.879          | 98.385     | < 0.001 |
| s(C112)                                              |          | 1.000          | 17.180     | < 0.001 |
| s(C211)                                              |          | 2.693          | 26.948     | < 0.001 |
| s(C213)                                              |          | 0.968          | 27.905     | < 0.001 |
| s(C221)                                              |          | 1.667          | 6.188      | 0.023   |
| s(C222)                                              |          | 0.897          | 7.571      | 0.004   |
| s(C223)                                              |          | 0.896          | 18.516     | < 0.001 |
| s(C224)                                              |          | 2.936          | 43.789     | < 0.001 |
| s(C231)                                              |          | 2.342          | 5.083      | 0.077   |
| s(C311)                                              |          | 2.063          | 14.276     | < 0.001 |
| s(C312)                                              |          | 2.104          | 18.278     | < 0.001 |
| s(C313)                                              |          | 0.000          | 0.000      | 0.200   |
| s(C320)                                              |          | 0.001          | 0.000      | 0.549   |
| s(C321)                                              |          | 0.685          | 2.502      | 0.054   |
| s(C330)                                              |          | 0.710          | 2.785      | 0.045   |
| s(C410)                                              |          | 0.291          | 0.593      | 0.139   |
| s(C511)                                              |          | 1.985          | 51.380     | < 0.001 |

| Carrion Crow ( <i>Corvus corone</i> ) — Model C-ZIP-GAM |          |                |            |         |
|---------------------------------------------------------|----------|----------------|------------|---------|
| Binomial component                                      |          |                |            |         |
| Parametric terms                                        | Estimate | Standard error | z-value    | p-value |
| Intercept                                               | −2.863   | 0.053          | −54.160    | < 0.001 |
| Smooth terms                                            |          | edf            | Chi square | p-value |
| s(Elevation)                                            |          | 2.984          | 1431.700   | < 0.001 |
| s(Urb <sub>2500</sub> )                                 |          | 2.994          | 376.100    | < 0.001 |
| s(For <sub>2500</sub> )                                 |          | 2.996          | 542.100    | < 0.001 |
| Count component                                         |          |                |            |         |
| Parametric terms                                        | Estimate | Standard error | z-value    | p-value |
| Intercept                                               | −5.174   | 0.647          | −7.995     | < 0.001 |
| Year 1995                                               | −0.692   | 0.767          | −0.903     | 0.367   |
| Year 1996                                               | 0.181    | 0.576          | 0.315      | 0.753   |
| Year 1999                                               | 0.282    | 0.532          | 0.530      | 0.596   |
| Year 2000                                               | 0.667    | 0.525          | 1.272      | 0.203   |
| Year 2001                                               | 0.632    | 0.522          | 1.211      | 0.226   |
| Year 2002                                               | 0.041    | 0.604          | 0.069      | 0.945   |
| Year 2003                                               | −0.474   | 0.589          | −0.805     | 0.421   |
| Year 2004                                               | −0.366   | 0.636          | −0.576     | 0.565   |
| Year 2005                                               | 0.373    | 0.526          | 0.709      | 0.478   |
| Year 2006                                               | 1.170    | 0.535          | 2.189      | 0.029   |
| Year 2007                                               | 0.229    | 0.543          | 0.422      | 0.673   |
| Year 2008                                               | 0.079    | 0.550          | 0.144      | 0.886   |
| Year 2009                                               | 0.464    | 0.535          | 0.867      | 0.386   |
| Year 2010                                               | 0.672    | 0.528          | 1.271      | 0.204   |
| Year 2011                                               | −0.285   | 0.557          | −0.512     | 0.609   |
| Year 2012                                               | 0.326    | 0.532          | 0.612      | 0.540   |
| Year 2013                                               | 0.407    | 0.529          | 0.769      | 0.442   |
| Year 2014                                               | −0.004   | 0.537          | −0.008     | 0.994   |
| Year 2015                                               | 0.057    | 0.530          | 0.108      | 0.914   |
| Year 2016                                               | −0.086   | 0.542          | −0.159     | 0.873   |
| Year 2017                                               | −0.610   | 0.596          | −1.024     | 0.306   |
| Year 2018                                               | −0.033   | 0.564          | −0.059     | 0.953   |
| Year 2019                                               | 0.041    | 0.553          | 0.074      | 0.941   |
| Sin                                                     | 0.018    | 0.059          | 0.309      | 0.757   |
| Cos                                                     | 0.150    | 0.079          | 1.904      | 0.057   |
| Smooth terms                                            |          | edf            | Chi square | p-value |
| s(X, Y)                                                 |          | 2.934          | 259.492    | < 0.001 |
| s(Elevation)                                            |          | 2.890          | 160.879    | < 0.001 |
| s(Slope)                                                |          | 1.688          | 8.534      | 0.006   |
| s(C110)                                                 |          | 0.000          | 0.000      | 0.568   |
| s(C112)                                                 |          | 1.859          | 6.212      | 0.027   |
| s(C211)                                                 |          | 0.000          | 0.000      | 0.883   |
| s(C213)                                                 |          | 0.000          | 0.000      | 0.918   |
| s(C221)                                                 |          | 0.006          | 0.006      | 0.314   |
| s(C222)                                                 |          | 0.751          | 1.916      | 0.110   |
| s(C223)                                                 |          | 0.001          | 0.000      | 0.440   |
| s(C224)                                                 |          | 0.000          | 0.000      | 0.602   |
| s(C231)                                                 |          | 1.749          | 41.659     | < 0.001 |
| s(C311)                                                 |          | 0.000          | 0.000      | 0.924   |
| s(C312)                                                 |          | 2.810          | 27.190     | < 0.001 |
| s(C313)                                                 |          | 0.497          | 1.046      | 0.139   |
| s(C320)                                                 |          | 0.550          | 2.109      | 0.040   |
| s(C321)                                                 |          | 0.737          | 7.744      | < 0.001 |
| s(C330)                                                 |          | 1.684          | 2.559      | 0.200   |
| s(C410)                                                 |          | 0.000          | 0.000      | 0.828   |
| s(C511)                                                 |          | 0.000          | 0.000      | 0.581   |

| <b>Hooded Crow (<i>Corvus cornix</i>) — Model C-ZINB-GAM</b> |                 |                       |                   |                |
|--------------------------------------------------------------|-----------------|-----------------------|-------------------|----------------|
| <b>Binomial component</b>                                    |                 |                       |                   |                |
| <b>Parametric terms</b>                                      | <b>Estimate</b> | <b>Standard error</b> | <b>z-value</b>    | <b>p-value</b> |
| Intercept                                                    | 5.315           | 0.158                 | 33.630            | < 0.001        |
| <b>Smooth terms</b>                                          |                 | <b>edf</b>            | <b>Chi square</b> | <b>p-value</b> |
| s(Elevation)                                                 |                 | 1.457                 | 1456.400          | < 0.001        |
| s(Urb <sub>2500</sub> )                                      |                 | 0.001                 | 0.000             | 0.910          |
| s(For <sub>2500</sub> )                                      |                 | 2.980                 | 661.300           | < 0.001        |
| <b>Count component</b>                                       |                 |                       |                   |                |
| <b>Parametric terms</b>                                      | <b>Estimate</b> | <b>Standard error</b> | <b>z-value</b>    | <b>p-value</b> |
| Intercept                                                    | −0.088          | 0.062                 | −1.420            | 0.156          |
| Year 1995                                                    | −0.471          | 0.080                 | −5.924            | < 0.001        |
| Year 1996                                                    | −0.475          | 0.078                 | −6.081            | < 0.001        |
| Year 1999                                                    | −0.016          | 0.071                 | −0.221            | 0.825          |
| Year 2000                                                    | −0.076          | 0.069                 | −1.099            | 0.272          |
| Year 2001                                                    | −0.061          | 0.071                 | −0.860            | 0.390          |
| Year 2002                                                    | 0.020           | 0.078                 | 0.251             | 0.802          |
| Year 2003                                                    | −0.231          | 0.083                 | −2.779            | 0.005          |
| Year 2004                                                    | −0.123          | 0.091                 | −1.345            | 0.179          |
| Year 2005                                                    | −0.092          | 0.071                 | −1.302            | 0.193          |
| Year 2006                                                    | 0.039           | 0.070                 | 0.554             | 0.579          |
| Year 2007                                                    | −0.161          | 0.076                 | −2.106            | 0.035          |
| Year 2008                                                    | −0.080          | 0.076                 | −1.050            | 0.294          |
| Year 2009                                                    | −0.249          | 0.076                 | −3.280            | 0.001          |
| Year 2010                                                    | −0.098          | 0.075                 | −1.314            | 0.189          |
| Year 2011                                                    | 0.042           | 0.072                 | 0.575             | 0.565          |
| Year 2012                                                    | −0.041          | 0.075                 | −0.542            | 0.588          |
| Year 2013                                                    | 0.001           | 0.074                 | 0.009             | 0.992          |
| Year 2014                                                    | 0.026           | 0.073                 | 0.361             | 0.718          |
| Year 2015                                                    | −0.057          | 0.075                 | −0.757            | 0.449          |
| Year 2016                                                    | −0.038          | 0.075                 | −0.504            | 0.615          |
| Year 2017                                                    | −0.075          | 0.082                 | −0.917            | 0.359          |
| Year 2018                                                    | −0.106          | 0.081                 | −1.309            | 0.191          |
| Year 2019                                                    | −0.162          | 0.082                 | −1.979            | 0.048          |
| Sin                                                          | 0.064           | 0.014                 | 4.471             | < 0.001        |
| Cos                                                          | 0.004           | 0.022                 | 0.190             | 0.850          |
| <b>Smooth terms</b>                                          |                 | <b>edf</b>            | <b>Chi square</b> | <b>p-value</b> |
| s(X, Y)                                                      |                 | 1.979                 | 241.191           | < 0.001        |
| s(Elevation)                                                 |                 | 1.864                 | 138.533           | < 0.001        |
| s(Slope)                                                     |                 | 2.505                 | 42.907            | < 0.001        |
| s(C110)                                                      |                 | 1.934                 | 36.587            | < 0.001        |
| s(C112)                                                      |                 | 1.061                 | 34.312            | < 0.001        |
| s(C211)                                                      |                 | 1.861                 | 36.774            | < 0.001        |
| s(C213)                                                      |                 | 2.669                 | 225.123           | < 0.001        |
| s(C221)                                                      |                 | 0.822                 | 4.528             | 0.017          |
| s(C222)                                                      |                 | 0.515                 | 1.050             | 0.151          |
| s(C223)                                                      |                 | 0.640                 | 1.698             | 0.103          |
| s(C224)                                                      |                 | 2.389                 | 93.992            | < 0.001        |
| s(C231)                                                      |                 | 2.691                 | 98.033            | < 0.001        |
| s(C311)                                                      |                 | 2.837                 | 117.467           | < 0.001        |
| s(C312)                                                      |                 | 2.080                 | 16.599            | < 0.001        |
| s(C313)                                                      |                 | 0.967                 | 12.294            | < 0.001        |
| s(C320)                                                      |                 | 0.985                 | 25.176            | < 0.001        |
| s(C321)                                                      |                 | 0.806                 | 4.028             | 0.022          |
| s(C330)                                                      |                 | 0.915                 | 10.360            | < 0.001        |
| s(C410)                                                      |                 | 0.001                 | 0.000             | 0.597          |
| s(C511)                                                      |                 | 0.945                 | 16.368            | < 0.001        |

| Common Starling ( <i>Sturnus vulgaris</i> ) — Model C-ZINB-GAM |          |                |            |         |
|----------------------------------------------------------------|----------|----------------|------------|---------|
| Binomial component                                             |          |                |            |         |
| Parametric terms                                               | Estimate | Standard error | z-value    | p-value |
| Intercept                                                      | 4.055    | 0.115          | 35.330     | < 0.001 |
| Smooth terms                                                   |          | edf            | Chi square | p-value |
| s(Elevation)                                                   |          | 2.933          | 1429.140   | < 0.001 |
| s(Urb <sub>2500</sub> )                                        |          | 0.999          | 77.630     | < 0.001 |
| s(For <sub>2500</sub> )                                        |          | 1.495          | 561.930    | < 0.001 |
| Count component                                                |          |                |            |         |
| Parametric terms                                               | Estimate | Standard error | z-value    | p-value |
| Intercept                                                      | −1.444   | 0.180          | −8.023     | < 0.001 |
| Year 1995                                                      | −0.441   | 0.083          | −5.316     | < 0.001 |
| Year 1996                                                      | −0.876   | 0.086          | −10.163    | < 0.001 |
| Year 1999                                                      | −0.117   | 0.078          | −1.502     | 0.133   |
| Year 2000                                                      | −0.127   | 0.074          | −1.717     | 0.086   |
| Year 2001                                                      | −0.510   | 0.078          | −6.519     | < 0.001 |
| Year 2002                                                      | −0.367   | 0.087          | −4.210     | < 0.001 |
| Year 2003                                                      | −0.580   | 0.091          | −6.363     | < 0.001 |
| Year 2004                                                      | −0.473   | 0.103          | −4.607     | < 0.001 |
| Year 2005                                                      | −0.305   | 0.074          | −4.114     | < 0.001 |
| Year 2006                                                      | −0.309   | 0.075          | −4.112     | < 0.001 |
| Year 2007                                                      | −0.412   | 0.081          | −5.087     | < 0.001 |
| Year 2008                                                      | −0.331   | 0.081          | −4.063     | < 0.001 |
| Year 2009                                                      | −0.480   | 0.081          | −5.915     | < 0.001 |
| Year 2010                                                      | −0.360   | 0.080          | −4.505     | < 0.001 |
| Year 2011                                                      | −0.456   | 0.079          | −5.801     | < 0.001 |
| Year 2012                                                      | −0.340   | 0.080          | −4.254     | < 0.001 |
| Year 2013                                                      | −0.509   | 0.080          | −6.350     | < 0.001 |
| Year 2014                                                      | −0.332   | 0.077          | −4.282     | < 0.001 |
| Year 2015                                                      | −0.577   | 0.082          | −7.067     | < 0.001 |
| Year 2016                                                      | −0.380   | 0.080          | −4.741     | < 0.001 |
| Year 2017                                                      | −0.694   | 0.094          | −7.409     | < 0.001 |
| Year 2018                                                      | −0.609   | 0.092          | −6.616     | < 0.001 |
| Year 2019                                                      | −0.742   | 0.094          | −7.868     | < 0.001 |
| Sin                                                            | 0.012    | 0.017          | 0.692      | 0.489   |
| Cos                                                            | 0.004    | 0.025          | 0.142      | 0.887   |
| Smooth terms                                                   |          | edf            | Chi square | p-value |
| s(X, Y)                                                        |          | 2.030          | 334.840    | < 0.001 |
| s(Elevation)                                                   |          | 2.659          | 69.480     | < 0.001 |
| s(Slope)                                                       |          | 1.671          | 176.691    | < 0.001 |
| s(C110)                                                        |          | 2.227          | 14.884     | < 0.001 |
| s(C112)                                                        |          | 2.303          | 45.970     | < 0.001 |
| s(C211)                                                        |          | 0.603          | 1.347      | 0.112   |
| s(C213)                                                        |          | 0.955          | 14.573     | < 0.001 |
| s(C221)                                                        |          | 0.974          | 26.401     | < 0.001 |
| s(C222)                                                        |          | 0.779          | 3.577      | 0.031   |
| s(C223)                                                        |          | 0.001          | 0.000      | 0.937   |
| s(C224)                                                        |          | 0.001          | 0.000      | 0.788   |
| s(C231)                                                        |          | 1.656          | 85.363     | < 0.001 |
| s(C311)                                                        |          | 2.446          | 135.150    | < 0.001 |
| s(C312)                                                        |          | 1.017          | 26.918     | < 0.001 |
| s(C313)                                                        |          | 2.138          | 65.853     | < 0.001 |
| s(C320)                                                        |          | 0.926          | 11.379     | < 0.001 |
| s(C321)                                                        |          | 0.654          | 2.098      | 0.072   |
| s(C330)                                                        |          | 0.750          | 2.873      | 0.049   |
| s(C410)                                                        |          | 0.013          | 0.009      | 0.402   |
| s(C511)                                                        |          | 0.775          | 3.409      | 0.032   |



| Italian Sparrow ( <i>Passer italiae</i> ) — Model C-ZIP-GAM |          |                |            |         |
|-------------------------------------------------------------|----------|----------------|------------|---------|
| Binomial component                                          |          |                |            |         |
| Parametric terms                                            | Estimate | Standard error | z-value    | p-value |
| Intercept                                                   | 6.307    | 0.180          | 35.120     | < 0.001 |
| Smooth terms                                                |          | edf            | Chi square | p-value |
| s(Elevation)                                                |          | 2.150          | 1884.500   | < 0.001 |
| s(Urb <sub>2500</sub> )                                     |          | 0.999          | 729.900    | < 0.001 |
| s(For <sub>2500</sub> )                                     |          | 0.000          | 0.000      | 0.552   |
| Count component                                             |          |                |            |         |
| Parametric terms                                            | Estimate | Standard error | z-value    | p-value |
| Intercept                                                   | −0.322   | 0.052          | −6.163     | < 0.001 |
| Year 1995                                                   | −0.351   | 0.058          | −6.045     | < 0.001 |
| Year 1996                                                   | −0.534   | 0.056          | −9.451     | < 0.001 |
| Year 1999                                                   | −0.073   | 0.055          | −1.333     | 0.183   |
| Year 2000                                                   | −0.268   | 0.052          | −5.182     | < 0.001 |
| Year 2001                                                   | −0.560   | 0.056          | −10.082    | < 0.001 |
| Year 2002                                                   | −0.393   | 0.064          | −6.179     | < 0.001 |
| Year 2003                                                   | −0.593   | 0.068          | −8.675     | < 0.001 |
| Year 2004                                                   | −0.621   | 0.077          | −8.047     | < 0.001 |
| Year 2005                                                   | −0.643   | 0.055          | −11.637    | < 0.001 |
| Year 2006                                                   | −0.791   | 0.057          | −13.808    | < 0.001 |
| Year 2007                                                   | −0.916   | 0.064          | −14.283    | < 0.001 |
| Year 2008                                                   | −0.916   | 0.064          | −14.220    | < 0.001 |
| Year 2009                                                   | −1.003   | 0.063          | −15.837    | < 0.001 |
| Year 2010                                                   | −0.998   | 0.064          | −15.556    | < 0.001 |
| Year 2011                                                   | −1.119   | 0.063          | −17.764    | < 0.001 |
| Year 2012                                                   | −1.157   | 0.068          | −17.088    | < 0.001 |
| Year 2013                                                   | −1.245   | 0.067          | −18.446    | < 0.001 |
| Year 2014                                                   | −1.388   | 0.067          | −20.794    | < 0.001 |
| Year 2015                                                   | −1.177   | 0.065          | −18.127    | < 0.001 |
| Year 2016                                                   | −1.355   | 0.071          | −19.011    | < 0.001 |
| Year 2017                                                   | −1.145   | 0.078          | −14.722    | < 0.001 |
| Year 2018                                                   | −0.977   | 0.073          | −13.454    | < 0.001 |
| Year 2019                                                   | −1.017   | 0.073          | −13.869    | < 0.001 |
| Sin                                                         | 0.000    | 0.014          | −0.034     | 0.973   |
| Cos                                                         | 0.000    | 0.022          | 0.010      | 0.992   |
| Smooth terms                                                |          | edf            | Chi square | p-value |
| s(X, Y)                                                     |          | 2.964          | 194.297    | < 0.001 |
| s(Elevation)                                                |          | 1.377          | 127.582    | < 0.001 |
| S(Slope)                                                    |          | 1.065          | 25.331     | < 0.001 |
| s(C110)                                                     |          | 2.300          | 179.201    | < 0.001 |
| s(C112)                                                     |          | 2.965          | 655.634    | < 0.001 |
| s(C211)                                                     |          | 1.323          | 33.441     | < 0.001 |
| s(C213)                                                     |          | 2.153          | 54.436     | < 0.001 |
| s(C221)                                                     |          | 2.490          | 17.050     | < 0.001 |
| s(C222)                                                     |          | 0.758          | 3.026      | 0.044   |
| s(C223)                                                     |          | 0.931          | 9.306      | 0.001   |
| s(C224)                                                     |          | 1.584          | 3.588      | 0.093   |
| s(C231)                                                     |          | 1.845          | 71.784     | < 0.001 |
| s(C311)                                                     |          | 2.905          | 171.857    | < 0.001 |
| s(C312)                                                     |          | 1.000          | 66.285     | < 0.001 |
| s(C313)                                                     |          | 2.198          | 94.083     | < 0.001 |
| s(C320)                                                     |          | 0.959          | 29.269     | < 0.001 |
| s(C321)                                                     |          | 1.836          | 3.547      | 0.129   |
| s(C330)                                                     |          | 1.635          | 8.853      | 0.005   |
| s(C410)                                                     |          | 0.897          | 13.400     | < 0.001 |
| s(C511)                                                     |          | 2.695          | 6.356      | 0.068   |

| Eurasian Tree Sparrow ( <i>Passer montanus</i> ) — Model C-ZIP-GAM |          |                |            |         |
|--------------------------------------------------------------------|----------|----------------|------------|---------|
| Binomial component                                                 |          |                |            |         |
| Parametric terms                                                   | Estimate | Standard error | z-value    | p-value |
| Intercept                                                          | 2.657    | 0.056          | 47.220     | < 0.001 |
| Smooth terms                                                       |          | edf            | Chi square | p-value |
| s(Elevation)                                                       |          | 1.274          | 1367.000   | < 0.001 |
| s(Urb <sub>2500</sub> )                                            |          | 2.987          | 1536.000   | < 0.001 |
| s(For <sub>2500</sub> )                                            |          | 2.992          | 1285.000   | < 0.001 |
| Count component                                                    |          |                |            |         |
| Parametric terms                                                   | Estimate | Standard error | z-value    | p-value |
| Intercept                                                          | −1.851   | 0.140          | −13.218    | < 0.001 |
| Year 1995                                                          | −0.352   | 0.108          | −3.245     | 0.001   |
| Year 1996                                                          | −0.464   | 0.106          | −4.387     | < 0.001 |
| Year 1999                                                          | −0.079   | 0.105          | −0.756     | 0.449   |
| Year 2000                                                          | −0.145   | 0.097          | −1.498     | 0.134   |
| Year 2001                                                          | −0.222   | 0.098          | −2.274     | 0.023   |
| Year 2002                                                          | −0.523   | 0.123          | −4.253     | < 0.001 |
| Year 2003                                                          | −0.806   | 0.138          | −5.845     | < 0.001 |
| Year 2004                                                          | −0.526   | 0.148          | −3.557     | < 0.001 |
| Year 2005                                                          | −0.378   | 0.099          | −3.828     | < 0.001 |
| Year 2006                                                          | −0.344   | 0.101          | −3.415     | < 0.001 |
| Year 2007                                                          | −0.311   | 0.106          | −2.945     | 0.003   |
| Year 2008                                                          | −0.286   | 0.107          | −2.681     | 0.007   |
| Year 2009                                                          | −0.291   | 0.103          | −2.835     | 0.005   |
| Year 2010                                                          | −0.482   | 0.108          | −4.444     | < 0.001 |
| Year 2011                                                          | −0.660   | 0.108          | −6.092     | < 0.001 |
| Year 2012                                                          | −0.669   | 0.114          | −5.889     | < 0.001 |
| Year 2013                                                          | −0.674   | 0.112          | −5.998     | < 0.001 |
| Year 2014                                                          | −0.528   | 0.109          | −4.862     | < 0.001 |
| Year 2015                                                          | −0.517   | 0.107          | −4.821     | < 0.001 |
| Year 2016                                                          | −0.583   | 0.111          | −5.256     | < 0.001 |
| Year 2017                                                          | −0.670   | 0.128          | −5.224     | < 0.001 |
| Year 2018                                                          | −0.766   | 0.131          | −5.853     | < 0.001 |
| Year 2019                                                          | −0.921   | 0.137          | −6.706     | < 0.001 |
| Sin                                                                | 0.025    | 0.023          | 1.085      | 0.278   |
| Cos                                                                | 0.064    | 0.035          | 1.811      | 0.070   |
| Smooth terms                                                       |          | edf            | Chi square | p-value |
| s(X, Y)                                                            |          | 2.956          | 60.667     | < 0.001 |
| s(Elevation)                                                       |          | 2.791          | 36.345     | < 0.001 |
| s(Slope)                                                           |          | 1.047          | 25.221     | < 0.001 |
| s(C110)                                                            |          | 2.252          | 15.416     | < 0.001 |
| s(C112)                                                            |          | 2.931          | 120.242    | < 0.001 |
| s(C211)                                                            |          | 1.069          | 18.045     | < 0.001 |
| s(C213)                                                            |          | 1.121          | 32.702     | < 0.001 |
| s(C221)                                                            |          | 1.890          | 13.353     | < 0.001 |
| s(C222)                                                            |          | 0.877          | 5.564      | 0.011   |
| s(C223)                                                            |          | 0.000          | 0.000      | 0.531   |
| s(C224)                                                            |          | 1.610          | 1.741      | 0.314   |
| s(C231)                                                            |          | 1.717          | 20.534     | < 0.001 |
| s(C311)                                                            |          | 2.146          | 50.230     | < 0.001 |
| s(C312)                                                            |          | 2.784          | 23.823     | < 0.001 |
| s(C313)                                                            |          | 2.059          | 32.807     | < 0.001 |
| s(C320)                                                            |          | 0.000          | 0.000      | 0.304   |
| s(C321)                                                            |          | 0.002          | 0.000      | 0.903   |
| s(C330)                                                            |          | 0.742          | 3.555      | 0.028   |
| s(C410)                                                            |          | 0.897          | 13.829     | < 0.001 |
| s(C511)                                                            |          | 1.905          | 4.068      | 0.105   |

| Common Chaffinch ( <i>Fringilla coelebs</i> ) — Model C-ZIP-GAM |          |                |            |         |
|-----------------------------------------------------------------|----------|----------------|------------|---------|
| Binomial component                                              |          |                |            |         |
| Parametric terms                                                | Estimate | Standard error | z-value    | p-value |
| Intercept                                                       | 6.300    | 1.912          | 3.296      | < 0.001 |
| Smooth terms                                                    |          | edf            | Chi square | p-value |
| s(Elevation)                                                    |          | 0.003          | 0.000      | 1.000   |
| s(Urb <sub>2500</sub> )                                         |          | 2.981          | 786.300    | < 0.001 |
| s(For <sub>2500</sub> )                                         |          | 1.639          | 1612.800   | < 0.001 |
| Count component                                                 |          |                |            |         |
| Parametric terms                                                | Estimate | Standard error | z-value    | p-value |
| Intercept                                                       | 0.205    | 0.050          | 4.072      | < 0.001 |
| Year 1995                                                       | −0.173   | 0.065          | −2.672     | 0.008   |
| Year 1996                                                       | −0.133   | 0.063          | −2.093     | 0.036   |
| Year 1999                                                       | −0.025   | 0.055          | −0.455     | 0.649   |
| Year 2000                                                       | −0.099   | 0.055          | −1.817     | 0.069   |
| Year 2001                                                       | −0.032   | 0.058          | −0.547     | 0.584   |
| Year 2002                                                       | −0.097   | 0.062          | −1.553     | 0.120   |
| Year 2003                                                       | −0.054   | 0.062          | −0.873     | 0.383   |
| Year 2004                                                       | −0.056   | 0.068          | −0.823     | 0.411   |
| Year 2005                                                       | 0.014    | 0.058          | 0.238      | 0.812   |
| Year 2006                                                       | 0.025    | 0.056          | 0.440      | 0.660   |
| Year 2007                                                       | 0.019    | 0.060          | 0.319      | 0.750   |
| Year 2008                                                       | 0.011    | 0.061          | 0.174      | 0.862   |
| Year 2009                                                       | 0.008    | 0.061          | 0.131      | 0.896   |
| Year 2010                                                       | −0.054   | 0.061          | −0.884     | 0.377   |
| Year 2011                                                       | −0.087   | 0.058          | −1.483     | 0.138   |
| Year 2012                                                       | −0.041   | 0.060          | −0.681     | 0.496   |
| Year 2013                                                       | −0.170   | 0.061          | −2.779     | 0.005   |
| Year 2014                                                       | −0.143   | 0.059          | −2.397     | 0.017   |
| Year 2015                                                       | −0.136   | 0.060          | −2.254     | 0.024   |
| Year 2016                                                       | −0.199   | 0.061          | −3.270     | 0.001   |
| Year 2017                                                       | −0.067   | 0.064          | −1.054     | 0.292   |
| Year 2018                                                       | −0.117   | 0.065          | −1.813     | 0.070   |
| Year 2019                                                       | −0.134   | 0.065          | −2.063     | 0.039   |
| Sin                                                             | −0.012   | 0.010          | −1.142     | 0.254   |
| Cos                                                             | 0.009    | 0.015          | 0.584      | 0.559   |
| Smooth terms                                                    |          | edf            | Chi square | p-value |
| s(X, Y)                                                         |          | 2.976          | 402.465    | < 0.001 |
| s(Elevation)                                                    |          | 2.668          | 110.564    | < 0.001 |
| s(Slope)                                                        |          | 2.697          | 66.233     | < 0.001 |
| s(C110)                                                         |          | 1.508          | 1.714      | 0.241   |
| s(C112)                                                         |          | 1.764          | 3.218      | 0.125   |
| s(C211)                                                         |          | 2.893          | 31.125     | < 0.001 |
| s(C213)                                                         |          | 0.907          | 17.705     | < 0.001 |
| s(C221)                                                         |          | 2.883          | 23.012     | < 0.001 |
| s(C222)                                                         |          | 1.738          | 3.473      | 0.125   |
| s(C223)                                                         |          | 1.781          | 10.761     | 0.002   |
| s(C224)                                                         |          | 1.423          | 24.062     | < 0.001 |
| s(C231)                                                         |          | 0.483          | 2.811      | 0.007   |
| s(C311)                                                         |          | 2.462          | 97.402     | < 0.001 |
| s(C312)                                                         |          | 2.860          | 209.555    | < 0.001 |
| s(C313)                                                         |          | 2.461          | 141.634    | < 0.001 |
| s(C320)                                                         |          | 0.697          | 3.709      | 0.011   |
| s(C321)                                                         |          | 2.949          | 136.362    | < 0.001 |
| s(C330)                                                         |          | 0.977          | 57.090     | < 0.001 |
| s(C410)                                                         |          | 0.912          | 13.229     | < 0.001 |
| s(C511)                                                         |          | 2.808          | 9.517      | 0.017   |

| European Serin ( <i>Serinus serinus</i> ) — Model C-ZIP-GAM |          |                |            |         |
|-------------------------------------------------------------|----------|----------------|------------|---------|
| Binomial component                                          |          |                |            |         |
| Parametric terms                                            | Estimate | Standard error | z-value    | p-value |
| Intercept                                                   | 0.357    | 0.026          | 13.560     | < 0.001 |
| Smooth terms                                                |          | edf            | Chi square | p-value |
| s(Elevation)                                                |          | 2.999          | 2188.000   | < 0.001 |
| s(Urb <sub>2500</sub> )                                     |          | 2.989          | 1835.000   | < 0.001 |
| s(For <sub>2500</sub> )                                     |          | 2.985          | 1446.000   | < 0.001 |
| Count component                                             |          |                |            |         |
| Parametric terms                                            | Estimate | Standard error | z-value    | p-value |
| Intercept                                                   | -1.300   | 0.114          | -11.431    | < 0.001 |
| Year 1995                                                   | -0.476   | 0.147          | -3.234     | 0.001   |
| Year 1996                                                   | -0.802   | 0.154          | -5.203     | < 0.001 |
| Year 1999                                                   | -0.271   | 0.135          | -2.016     | 0.044   |
| Year 2000                                                   | -0.037   | 0.121          | -0.308     | 0.758   |
| Year 2001                                                   | -0.389   | 0.136          | -2.865     | 0.004   |
| Year 2002                                                   | -0.126   | 0.146          | -0.867     | 0.386   |
| Year 2003                                                   | -0.378   | 0.154          | -2.447     | 0.014   |
| Year 2004                                                   | -0.188   | 0.164          | -1.146     | 0.252   |
| Year 2005                                                   | -0.192   | 0.126          | -1.525     | 0.127   |
| Year 2006                                                   | -0.088   | 0.122          | -0.719     | 0.472   |
| Year 2007                                                   | -0.203   | 0.130          | -1.555     | 0.120   |
| Year 2008                                                   | -0.159   | 0.129          | -1.232     | 0.218   |
| Year 2009                                                   | -0.113   | 0.129          | -0.874     | 0.382   |
| Year 2010                                                   | -0.241   | 0.129          | -1.875     | 0.061   |
| Year 2011                                                   | -0.463   | 0.129          | -3.598     | < 0.001 |
| Year 2012                                                   | -0.231   | 0.129          | -1.790     | 0.073   |
| Year 2013                                                   | -0.524   | 0.137          | -3.824     | < 0.001 |
| Year 2014                                                   | -0.555   | 0.128          | -4.320     | < 0.001 |
| Year 2015                                                   | -0.565   | 0.134          | -4.221     | < 0.001 |
| Year 2016                                                   | -0.448   | 0.133          | -3.380     | < 0.001 |
| Year 2017                                                   | -0.440   | 0.147          | -2.997     | 0.003   |
| Year 2018                                                   | -0.333   | 0.143          | -2.329     | 0.020   |
| Year 2019                                                   | -0.317   | 0.141          | -2.250     | 0.024   |
| Sin                                                         | -0.050   | 0.026          | -1.894     | 0.058   |
| Cos                                                         | -0.079   | 0.042          | -1.878     | 0.060   |
| Smooth terms                                                |          | edf            | Chi square | p-value |
| s(X, Y)                                                     |          | 2.988          | < 0.001    | < 0.001 |
| s(Elevation)                                                |          | 0.001          | 0.000      | 0.604   |
| s(Slope)                                                    |          | 2.895          | 113.883    | < 0.001 |
| s(C110)                                                     |          | 2.386          | 121.305    | < 0.001 |
| s(C112)                                                     |          | 1.746          | 67.878     | < 0.001 |
| s(C211)                                                     |          | 0.542          | 0.944      | 0.164   |
| s(C213)                                                     |          | 0.988          | 29.669     | < 0.001 |
| s(C221)                                                     |          | 2.895          | 110.787    | < 0.001 |
| s(C222)                                                     |          | 0.909          | 16.834     | < 0.001 |
| s(C223)                                                     |          | 0.721          | 3.434      | 0.026   |
| s(C224)                                                     |          | 0.675          | 1.737      | 0.106   |
| s(C231)                                                     |          | 2.081          | 8.550      | 0.005   |
| s(C311)                                                     |          | 2.886          | 118.367    | < 0.001 |
| s(C312)                                                     |          | 1.860          | 31.369     | < 0.001 |
| s(C313)                                                     |          | 2.228          | 63.291     | < 0.001 |
| s(C320)                                                     |          | 0.773          | 2.389      | 0.071   |
| s(C321)                                                     |          | 1.911          | 7.472      | 0.015   |
| s(C330)                                                     |          | 1.915          | 15.494     | < 0.001 |
| s(C410)                                                     |          | 0.954          | 11.390     | < 0.001 |
| s(C511)                                                     |          | 1.291          | 0.428      | 0.665   |

| European Greenfinch ( <i>Chloris chloris</i> ) — Model C-ZINB-GAM |          |                |            |         |
|-------------------------------------------------------------------|----------|----------------|------------|---------|
| Binomial component                                                |          |                |            |         |
| Parametric terms                                                  | Estimate | Standard error | z-value    | p-value |
| Intercept                                                         | −0.146   | 0.019          | −7.711     | < 0.001 |
| Smooth terms                                                      |          | edf            | Chi square | p-value |
| s(Elevation)                                                      |          | 2.999          | 1202.150   | < 0.001 |
| s(Urb <sub>2500</sub> )                                           |          | 2.978          | 1058.550   | < 0.001 |
| s(For <sub>2500</sub> )                                           |          | 1.262          | 54.350     | < 0.001 |
| Count component                                                   |          |                |            |         |
| Parametric terms                                                  | Estimate | Standard error | z-value    | p-value |
| Intercept                                                         | −0.632   | 0.109          | −5.807     | < 0.001 |
| Year 1995                                                         | −0.378   | 0.121          | −3.118     | 0.002   |
| Year 1996                                                         | −0.627   | 0.122          | −5.143     | < 0.001 |
| Year 1999                                                         | −0.084   | 0.115          | −0.733     | 0.464   |
| Year 2000                                                         | −0.024   | 0.106          | −0.226     | 0.821   |
| Year 2001                                                         | −0.659   | 0.118          | −5.569     | < 0.001 |
| Year 2002                                                         | −0.634   | 0.137          | −4.641     | < 0.001 |
| Year 2003                                                         | −0.767   | 0.141          | −5.426     | < 0.001 |
| Year 2004                                                         | −1.120   | 0.176          | −6.369     | < 0.001 |
| Year 2005                                                         | −1.016   | 0.121          | −8.411     | < 0.001 |
| Year 2006                                                         | −1.107   | 0.122          | −9.098     | < 0.001 |
| Year 2007                                                         | −1.093   | 0.134          | −8.154     | < 0.001 |
| Year 2008                                                         | −0.987   | 0.129          | −7.631     | < 0.001 |
| Year 2009                                                         | −1.450   | 0.145          | −10.017    | < 0.001 |
| Year 2010                                                         | −1.443   | 0.144          | −10.047    | < 0.001 |
| Year 2011                                                         | −1.255   | 0.129          | −9.746     | < 0.001 |
| Year 2012                                                         | −0.986   | 0.129          | −7.644     | < 0.001 |
| Year 2013                                                         | −1.446   | 0.144          | −10.072    | < 0.001 |
| Year 2014                                                         | −1.582   | 0.136          | −11.645    | < 0.001 |
| Year 2015                                                         | −1.429   | 0.137          | −10.428    | < 0.001 |
| Year 2016                                                         | −1.658   | 0.151          | −11.019    | < 0.001 |
| Year 2017                                                         | −1.592   | 0.168          | −9.460     | < 0.001 |
| Year 2018                                                         | −1.973   | 0.191          | −10.323    | < 0.001 |
| Year 2019                                                         | −1.691   | 0.173          | −9.750     | < 0.001 |
| Sin                                                               | 0.058    | 0.030          | 1.966      | 0.049   |
| Cos                                                               | −0.061   | 0.046          | −1.329     | 0.184   |
| Smooth terms                                                      |          | edf            | Chi square | p-value |
| s(X, Y)                                                           |          | 2.984          | 329.850    | < 0.001 |
| s(Elevation)                                                      |          | 2.704          | 19.338     | < 0.001 |
| s(Slope)                                                          |          | 0.998          | 9.789      | < 0.001 |
| s(C110)                                                           |          | 2.500          | 125.367    | < 0.001 |
| s(C112)                                                           |          | 0.944          | 12.391     | < 0.001 |
| s(C211)                                                           |          | 0.825          | 3.710      | 0.027   |
| s(C213)                                                           |          | 0.982          | 22.378     | < 0.001 |
| s(C221)                                                           |          | 0.936          | 13.978     | < 0.001 |
| s(C222)                                                           |          | 0.028          | 0.029      | 0.305   |
| s(C223)                                                           |          | 0.902          | 9.298      | 0.001   |
| s(C224)                                                           |          | 0.920          | 10.673     | < 0.001 |
| s(C231)                                                           |          | 0.001          | 0.000      | 0.633   |
| s(C311)                                                           |          | 2.713          | 123.871    | < 0.001 |
| s(C312)                                                           |          | 0.998          | 21.063     | < 0.001 |
| s(C313)                                                           |          | 1.033          | 33.425     | < 0.001 |
| s(C320)                                                           |          | 0.000          | 0.000      | 0.845   |
| s(C321)                                                           |          | 0.333          | 0.470      | 0.231   |
| s(C330)                                                           |          | 0.000          | 0.000      | 0.903   |
| s(C410)                                                           |          | 0.933          | 12.960     | < 0.001 |
| s(C511)                                                           |          | 0.693          | 2.180      | 0.075   |

| European Goldfinch ( <i>Carduelis carduelis</i> ) — Model C-ZINB-GAM |          |                |            |         |
|----------------------------------------------------------------------|----------|----------------|------------|---------|
| Binomial component                                                   |          |                |            |         |
| Parametric terms                                                     | Estimate | Standard error | z-value    | p-value |
| Intercept                                                            | 0.065    | 0.019          | 3.525      | < 0.001 |
| Smooth terms                                                         |          | edf            | Chi square | p-value |
| s(Elevation)                                                         |          | 2.941          | 1045.600   | < 0.001 |
| s(Urb <sub>2500</sub> )                                              |          | 2.984          | 181.300    | < 0.001 |
| s(For <sub>2500</sub> )                                              |          | 2.952          | 59.300     | < 0.001 |
| Count component                                                      |          |                |            |         |
| Parametric terms                                                     | Estimate | Standard error | z-value    | p-value |
| Intercept                                                            | −0.281   | 0.099          | −2.850     | 0.004   |
| Year 1995                                                            | −0.638   | 0.125          | −5.087     | < 0.001 |
| Year 1996                                                            | −0.316   | 0.115          | −2.745     | 0.006   |
| Year 1999                                                            | −0.168   | 0.112          | −1.500     | 0.134   |
| Year 2000                                                            | −0.131   | 0.107          | −1.225     | 0.221   |
| Year 2001                                                            | −0.298   | 0.112          | −2.670     | 0.008   |
| Year 2002                                                            | −0.503   | 0.130          | −3.871     | < 0.001 |
| Year 2003                                                            | −0.450   | 0.129          | −3.497     | < 0.001 |
| Year 2004                                                            | −0.728   | 0.153          | −4.745     | < 0.001 |
| Year 2005                                                            | −0.728   | 0.114          | −6.369     | < 0.001 |
| Year 2006                                                            | −1.077   | 0.123          | −8.789     | < 0.001 |
| Year 2007                                                            | −1.136   | 0.136          | −8.377     | < 0.001 |
| Year 2008                                                            | −1.247   | 0.139          | −8.958     | < 0.001 |
| Year 2009                                                            | −1.447   | 0.145          | −9.992     | < 0.001 |
| Year 2010                                                            | −1.541   | 0.148          | −10.402    | < 0.001 |
| Year 2011                                                            | −1.676   | 0.144          | −11.677    | < 0.001 |
| Year 2012                                                            | −1.289   | 0.135          | −9.517     | < 0.001 |
| Year 2013                                                            | −1.268   | 0.134          | −9.449     | < 0.001 |
| Year 2014                                                            | −1.549   | 0.139          | −11.151    | < 0.001 |
| Year 2015                                                            | −1.373   | 0.136          | −10.064    | < 0.001 |
| Year 2016                                                            | −1.532   | 0.141          | −10.846    | < 0.001 |
| Year 2017                                                            | −1.458   | 0.159          | −9.188     | < 0.001 |
| Year 2018                                                            | −1.871   | 0.181          | −10.326    | < 0.001 |
| Year 2019                                                            | −1.947   | 0.184          | −10.578    | < 0.001 |
| Sin                                                                  | −0.023   | 0.028          | −0.845     | 0.398   |
| Cos                                                                  | 0.005    | 0.041          | 0.125      | 0.901   |
| Smooth terms                                                         |          | edf            | Chi square | p-value |
| s(X, Y)                                                              |          | 1.934          | 85.697     | < 0.001 |
| s(Elevation)                                                         |          | 2.717          | 68.253     | < 0.001 |
| s(Slope)                                                             |          | 2.561          | 35.419     | < 0.001 |
| s(C110)                                                              |          | 2.540          | 79.730     | < 0.001 |
| s(C112)                                                              |          | 1.005          | 23.050     | < 0.001 |
| s(C211)                                                              |          | 0.967          | 6.051      | 0.007   |
| s(C213)                                                              |          | 0.001          | 0.001      | 0.396   |
| s(C221)                                                              |          | 0.934          | 13.401     | < 0.001 |
| s(C222)                                                              |          | 0.074          | 0.080      | 0.296   |
| s(C223)                                                              |          | 0.352          | 0.571      | 0.202   |
| s(C224)                                                              |          | 0.001          | 0.001      | 0.403   |
| s(C231)                                                              |          | 1.850          | 35.231     | < 0.001 |
| s(C311)                                                              |          | 2.677          | 119.049    | < 0.001 |
| s(C312)                                                              |          | 1.185          | 56.521     | < 0.001 |
| s(C313)                                                              |          | 2.428          | 57.803     | < 0.001 |
| s(C320)                                                              |          | 0.897          | 7.960      | 0.003   |
| s(C321)                                                              |          | 0.291          | 0.398      | 0.238   |
| s(C330)                                                              |          | 0.003          | 0.001      | 0.530   |
| s(C410)                                                              |          | 0.873          | 6.535      | 0.006   |
| s(C511)                                                              |          | 0.801          | 4.036      | 0.023   |

| Common Linnet ( <i>Linaria cannabina</i> ) — Model C-ZINB-GAM |          |                |            |         |
|---------------------------------------------------------------|----------|----------------|------------|---------|
| Binomial component                                            |          |                |            |         |
| Parametric terms                                              | Estimate | Standard error | z-value    | p-value |
| Intercept                                                     | −2.930   | 0.044          | −67.050    | < 0.001 |
| Smooth terms                                                  |          | edf            | Chi square | p-value |
| s(Elevation)                                                  |          | 2.686          | 3830.038   | < 0.001 |
| s(Urb <sub>2500</sub> )                                       |          | 0.000          | 0.000      | 0.946   |
| s(For <sub>2500</sub> )                                       |          | 0.500          | 2.865      | 0.011   |
| Count component                                               |          |                |            |         |
| Parametric terms                                              | Estimate | Standard error | z-value    | p-value |
| Intercept                                                     | −9.612   | 20.227         | −0.475     | 0.635   |
| Year 1996                                                     | −1.059   | 0.633          | −1.672     | 0.094   |
| Year 1999                                                     | −0.150   | 0.439          | −0.341     | 0.733   |
| Year 2000                                                     | −0.131   | 0.410          | −0.319     | 0.750   |
| Year 2001                                                     | −0.413   | 0.465          | −0.888     | 0.374   |
| Year 2002                                                     | −0.373   | 0.473          | −0.790     | 0.429   |
| Year 2003                                                     | −0.109   | 0.429          | −0.254     | 0.799   |
| Year 2004                                                     | −0.727   | 0.500          | −1.454     | 0.146   |
| Year 2005                                                     | 0.552    | 0.388          | 1.423      | 0.155   |
| Year 2006                                                     | 0.233    | 0.414          | 0.564      | 0.573   |
| Year 2007                                                     | −0.073   | 0.420          | −0.175     | 0.861   |
| Year 2008                                                     | 0.183    | 0.406          | 0.449      | 0.653   |
| Year 2009                                                     | −0.096   | 0.420          | −0.228     | 0.820   |
| Year 2010                                                     | −0.268   | 0.421          | −0.637     | 0.524   |
| Year 2011                                                     | 0.278    | 0.401          | 0.692      | 0.489   |
| Year 2012                                                     | 0.150    | 0.402          | 0.373      | 0.709   |
| Year 2013                                                     | −0.115   | 0.411          | −0.280     | 0.780   |
| Year 2014                                                     | −0.227   | 0.410          | −0.553     | 0.580   |
| Year 2015                                                     | −0.205   | 0.409          | −0.501     | 0.616   |
| Year 2016                                                     | −0.460   | 0.419          | −1.098     | 0.272   |
| Year 2017                                                     | −0.372   | 0.423          | −0.880     | 0.379   |
| Year 2018                                                     | −0.417   | 0.430          | −0.969     | 0.333   |
| Year 2019                                                     | 0.117    | 0.408          | 0.286      | 0.775   |
| Sin                                                           | −0.114   | 0.071          | −1.598     | 0.110   |
| Cos                                                           | −0.072   | 0.114          | −0.635     | 0.525   |
| Smooth terms                                                  |          | edf            | Chi square | p-value |
| s(X, Y)                                                       |          | 1.944          | 56.401     | < 0.001 |
| s(Elevation)                                                  |          | 2.730          | 98.546     | < 0.001 |
| s(Slope)                                                      |          | 1.882          | 5.297      | 0.049   |
| s(C110)                                                       |          | 0.000          | 0.000      | 0.634   |
| s(C112)                                                       |          | 2.049          | 16.564     | < 0.001 |
| s(C211)                                                       |          | 0.000          | 0.000      | 0.415   |
| s(C213)                                                       |          | 0.705          | 0.012      | 0.899   |
| s(C221)                                                       |          | 0.940          | 13.156     | < 0.001 |
| s(C222)                                                       |          | 0.000          | 0.000      | 0.930   |
| s(C223)                                                       |          | 0.000          | 0.000      | 0.827   |
| s(C224)                                                       |          | 0.267          | 0.056      | 0.646   |
| s(C231)                                                       |          | 0.000          | 0.000      | 0.850   |
| s(C311)                                                       |          | 1.090          | 22.332     | < 0.001 |
| s(C312)                                                       |          | 1.964          | 79.921     | < 0.001 |
| s(C313)                                                       |          | 1.038          | 32.620     | < 0.001 |
| s(C320)                                                       |          | 2.260          | 15.396     | < 0.001 |
| s(C321)                                                       |          | 0.000          | 0.000      | 0.940   |
| s(C330)                                                       |          | 0.984          | 32.762     | < 0.001 |
| s(C410)                                                       |          | 0.002          | 0.001      | 0.383   |
| s(C511)                                                       |          | 0.823          | 4.278      | 0.022   |

| Common Redpoll ( <i>Acanthis flammea</i> ) — Model C-ZINB-GAM |          |                |            |         |
|---------------------------------------------------------------|----------|----------------|------------|---------|
| Binomial component                                            |          |                |            |         |
| Parametric terms                                              | Estimate | Standard error | z-value    | p-value |
| Intercept                                                     | −3.551   | 0.067          | −53.160    | < 0.001 |
| Smooth terms                                                  |          | edf            | Chi square | p-value |
| s(Elevation)                                                  |          | 2.892          | 2178.420   | < 0.001 |
| s(Urb <sub>2500</sub> )                                       |          | 0.000          | 0.000      | 0.929   |
| s(For <sub>2500</sub> )                                       |          | 2.306          | 42.360     | < 0.001 |
| Count component                                               |          |                |            |         |
| Parametric terms                                              | Estimate | Standard error | z-value    | p-value |
| Intercept                                                     | −7.041   | 25.421         | −0.277     | 0.782   |
| Year 1995                                                     | 0.295    | 0.547          | 0.539      | 0.590   |
| Year 1996                                                     | 0.634    | 0.551          | 1.152      | 0.249   |
| Year 1999                                                     | −0.609   | 0.562          | −1.085     | 0.278   |
| Year 2000                                                     | 0.423    | 0.528          | 0.801      | 0.423   |
| Year 2001                                                     | −0.185   | 0.548          | −0.337     | 0.736   |
| Year 2002                                                     | 0.314    | 0.548          | 0.574      | 0.566   |
| Year 2003                                                     | −0.752   | 0.557          | −1.349     | 0.177   |
| Year 2004                                                     | 0.155    | 0.542          | 0.285      | 0.775   |
| Year 2005                                                     | 0.206    | 0.518          | 0.397      | 0.691   |
| Year 2006                                                     | 0.349    | 0.541          | 0.645      | 0.519   |
| Year 2007                                                     | −0.378   | 0.543          | −0.697     | 0.486   |
| Year 2008                                                     | −0.574   | 0.544          | −1.055     | 0.291   |
| Year 2009                                                     | −0.701   | 0.549          | −1.276     | 0.202   |
| Year 2010                                                     | −0.875   | 0.561          | −1.560     | 0.119   |
| Year 2011                                                     | −0.022   | 0.527          | −0.042     | 0.967   |
| Year 2012                                                     | 0.173    | 0.521          | 0.333      | 0.739   |
| Year 2013                                                     | −0.154   | 0.530          | −0.291     | 0.771   |
| Year 2014                                                     | 0.013    | 0.523          | 0.026      | 0.979   |
| Year 2015                                                     | 0.085    | 0.518          | 0.163      | 0.870   |
| Year 2016                                                     | −0.586   | 0.537          | −1.090     | 0.276   |
| Year 2017                                                     | −0.551   | 0.544          | −1.014     | 0.311   |
| Year 2018                                                     | −0.902   | 0.566          | −1.595     | 0.111   |
| Year 2019                                                     | −0.641   | 0.549          | −1.168     | 0.243   |
| Sin                                                           | −0.124   | 0.064          | −1.929     | 0.054   |
| Cos                                                           | 0.344    | 0.090          | 3.811      | < 0.001 |
| Smooth terms                                                  |          | edf            | Chi square | p-value |
| s(X, Y)                                                       |          | 1.783          | 16.389     | < 0.001 |
| s(Elevation)                                                  |          | 2.496          | 34.507     | < 0.001 |
| s(Slope)                                                      |          | 2.535          | 25.271     | < 0.001 |
| s(C110)                                                       |          | 0.002          | 0.001      | 0.413   |
| s(C112)                                                       |          | 0.000          | 0.000      | 0.400   |
| s(C211)                                                       |          | 0.597          | 0.743      | 0.259   |
| s(C213)                                                       |          | 0.000          | 0.000      | 0.860   |
| s(C221)                                                       |          | 0.000          | 0.000      | 0.624   |
| s(C222)                                                       |          | 0.000          | 0.000      | 0.852   |
| s(C223)                                                       |          | 0.000          | 0.000      | 0.902   |
| s(C224)                                                       |          | 0.227          | 0.013      | 0.810   |
| s(C231)                                                       |          | 0.000          | 0.000      | 1.000   |
| s(C311)                                                       |          | 0.000          | 0.000      | 0.881   |
| s(C312)                                                       |          | 2.209          | 28.429     | < 0.001 |
| s(C313)                                                       |          | 0.831          | 4.305      | 0.021   |
| s(C320)                                                       |          | 2.035          | 7.829      | 0.013   |
| s(C321)                                                       |          | 2.198          | 18.131     | < 0.001 |
| s(C330)                                                       |          | 0.529          | 1.112      | 0.142   |
| s(C410)                                                       |          | 0.000          | 0.000      | 0.605   |
| s(C511)                                                       |          | 0.001          | 0.000      | 0.446   |



| Eurasian Bullfinch ( <i>Pyrrhula pyrrhula</i> ) — Model C-ZIP-GAM |          |                |            |         |
|-------------------------------------------------------------------|----------|----------------|------------|---------|
| Binomial component                                                |          |                |            |         |
| Parametric terms                                                  | Estimate | Standard error | z-value    | p-value |
| Intercept                                                         | −2.553   | 0.039          | −64.760    | < 0.001 |
| Smooth terms                                                      |          | edf            | Chi square | p-value |
| s(Elevation)                                                      |          | 2.996          | 2722.820   | < 0.001 |
| s(Urb <sub>2500</sub> )                                           |          | 0.002          | 0.000      | 1.000   |
| s(For <sub>2500</sub> )                                           |          | 2.006          | 97.430     | < 0.001 |
| Count component                                                   |          |                |            |         |
| Parametric terms                                                  | Estimate | Standard error | z-value    | p-value |
| Intercept                                                         | −6.245   | 3.029          | −2.061     | 0.039   |
| Year 1995                                                         | 1.299    | 0.514          | 2.529      | 0.011   |
| Year 1996                                                         | −0.663   | 0.734          | −0.903     | 0.367   |
| Year 1999                                                         | 0.845    | 0.478          | 1.770      | 0.077   |
| Year 2000                                                         | 0.961    | 0.469          | 2.048      | 0.041   |
| Year 2001                                                         | 1.529    | 0.469          | 3.259      | 0.001   |
| Year 2002                                                         | 1.383    | 0.477          | 2.898      | 0.004   |
| Year 2003                                                         | 1.080    | 0.486          | 2.224      | 0.026   |
| Year 2004                                                         | 1.254    | 0.510          | 2.461      | 0.014   |
| Year 2005                                                         | 1.019    | 0.480          | 2.124      | 0.034   |
| Year 2006                                                         | 0.209    | 0.551          | 0.380      | 0.704   |
| Year 2007                                                         | 0.293    | 0.519          | 0.563      | 0.573   |
| Year 2008                                                         | 1.248    | 0.481          | 2.595      | 0.009   |
| Year 2009                                                         | 0.517    | 0.523          | 0.987      | 0.323   |
| Year 2010                                                         | 1.083    | 0.489          | 2.216      | 0.027   |
| Year 2011                                                         | 1.275    | 0.478          | 2.668      | 0.008   |
| Year 2012                                                         | 1.071    | 0.491          | 2.181      | 0.029   |
| Year 2013                                                         | 0.780    | 0.496          | 1.574      | 0.115   |
| Year 2014                                                         | 0.699    | 0.498          | 1.402      | 0.161   |
| Year 2015                                                         | 1.051    | 0.487          | 2.161      | 0.031   |
| Year 2016                                                         | 0.992    | 0.487          | 2.038      | 0.042   |
| Year 2017                                                         | 0.822    | 0.516          | 1.594      | 0.111   |
| Year 2018                                                         | 0.599    | 0.530          | 1.131      | 0.258   |
| Year 2019                                                         | 0.653    | 0.530          | 1.234      | 0.217   |
| Sin                                                               | −0.008   | 0.056          | −0.148     | 0.882   |
| Cos                                                               | 0.069    | 0.079          | 0.879      | 0.380   |
| Smooth terms                                                      |          | edf            | Chi square | p-value |
| s(X, Y)                                                           |          | 1.918          | 55.513     | < 0.001 |
| s(Elevation)                                                      |          | 2.835          | 34.892     | < 0.001 |
| s(Slope)                                                          |          | 0.931          | 8.684      | 0.002   |
| s(C110)                                                           |          | 1.939          | 14.939     | < 0.001 |
| s(C112)                                                           |          | 0.962          | 14.599     | < 0.001 |
| s(C211)                                                           |          | 0.821          | 3.303      | 0.042   |
| s(C213)                                                           |          | 0.001          | 0.000      | 0.595   |
| s(C221)                                                           |          | 0.647          | 0.327      | 0.477   |
| s(C222)                                                           |          | 0.609          | 0.040      | 0.797   |
| s(C223)                                                           |          | 0.001          | 0.000      | 0.820   |
| s(C224)                                                           |          | 0.000          | 0.000      | 0.706   |
| s(C231)                                                           |          | 1.426          | 33.316     | < 0.001 |
| s(C311)                                                           |          | 1.013          | 13.524     | < 0.001 |
| s(C312)                                                           |          | 2.459          | 28.298     | < 0.001 |
| s(C313)                                                           |          | 0.000          | 0.000      | 0.386   |
| s(C320)                                                           |          | 2.637          | 14.036     | 0.001   |
| s(C321)                                                           |          | 2.823          | 44.499     | < 0.001 |
| s(C330)                                                           |          | 1.774          | 11.105     | 0.002   |
| s(C410)                                                           |          | 0.000          | 0.000      | 0.507   |
| s(C511)                                                           |          | 0.882          | 7.720      | 0.003   |

**Figure S2. Plot of population indices with confidence intervals and regression line for the 76 studied species.** Y-axis represents estimated number of breeding pairs per point count (see Section 2.3 for details). Dot and bars represent the median and the 2.5th-97.5th percentiles of 1000 bootstrapped values, respectively. Fitted WLS-regression lines with confidence intervals (shaded area) are superimposed.

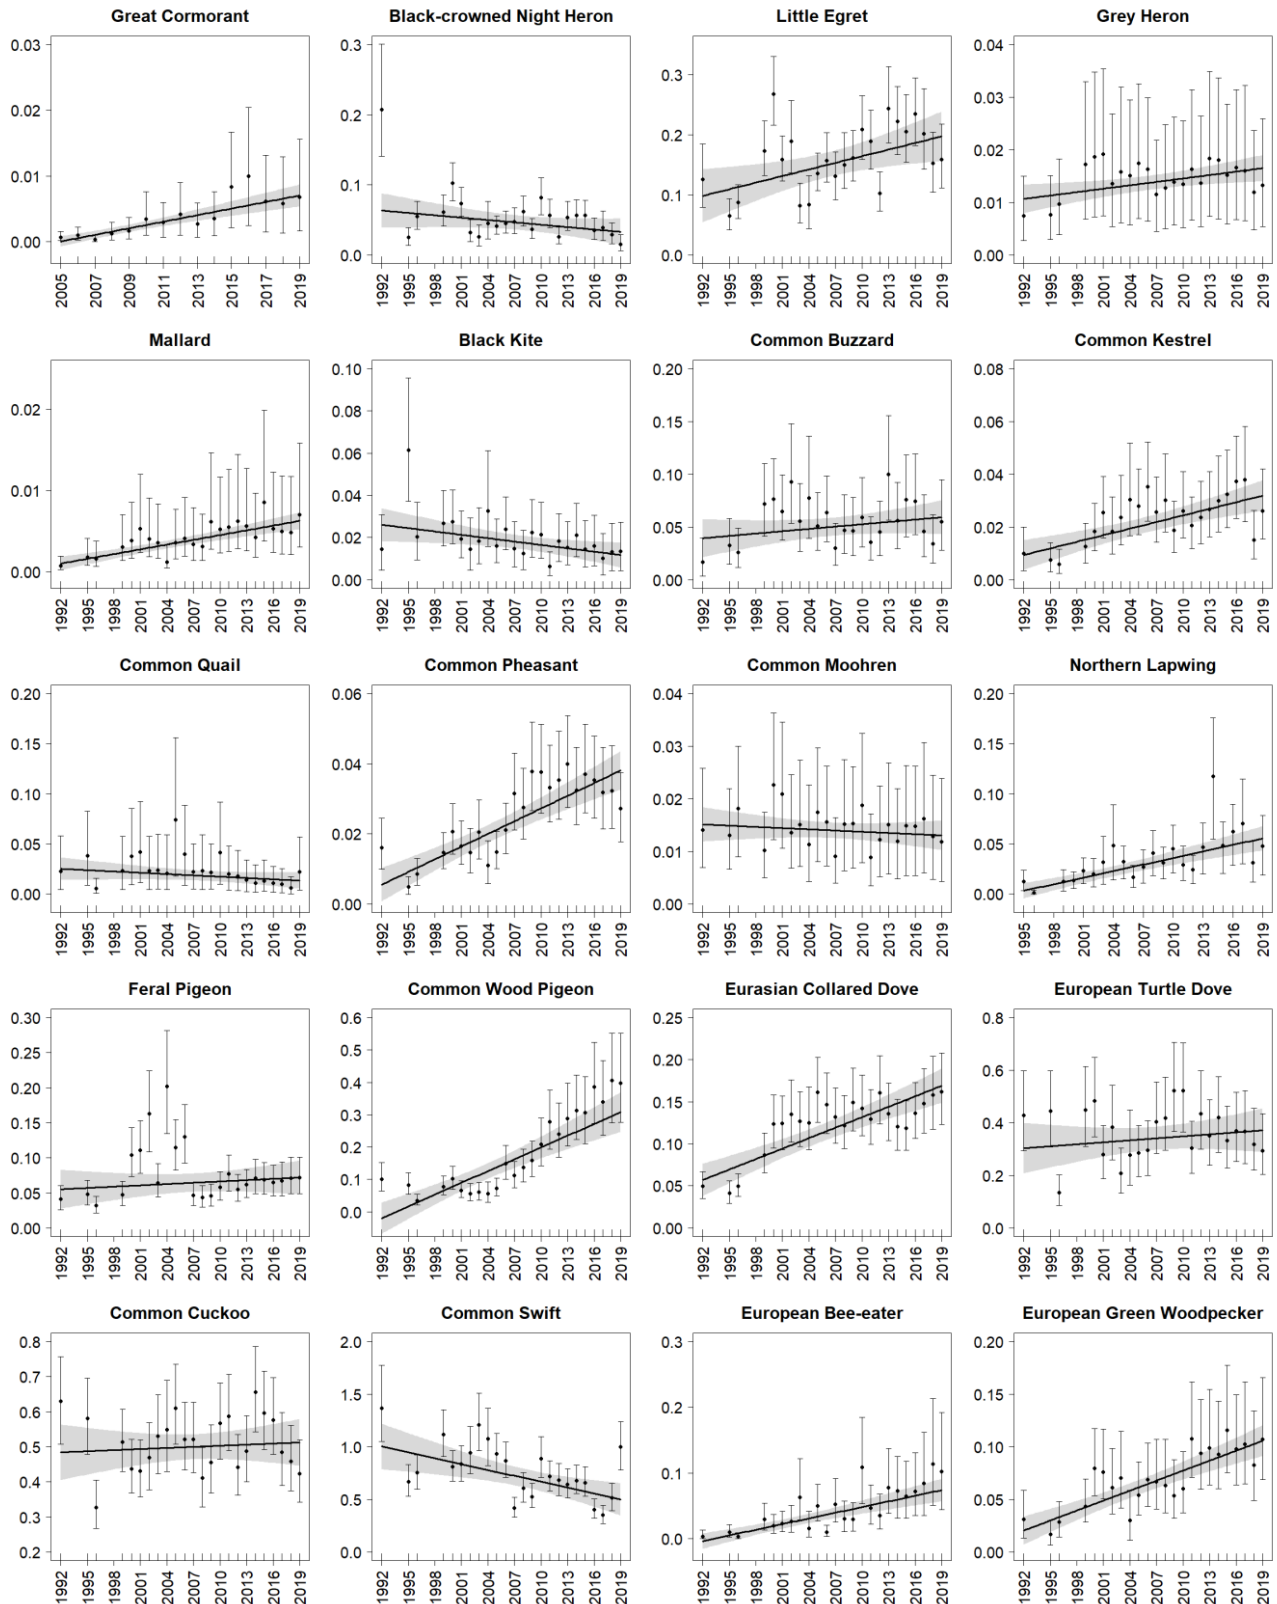

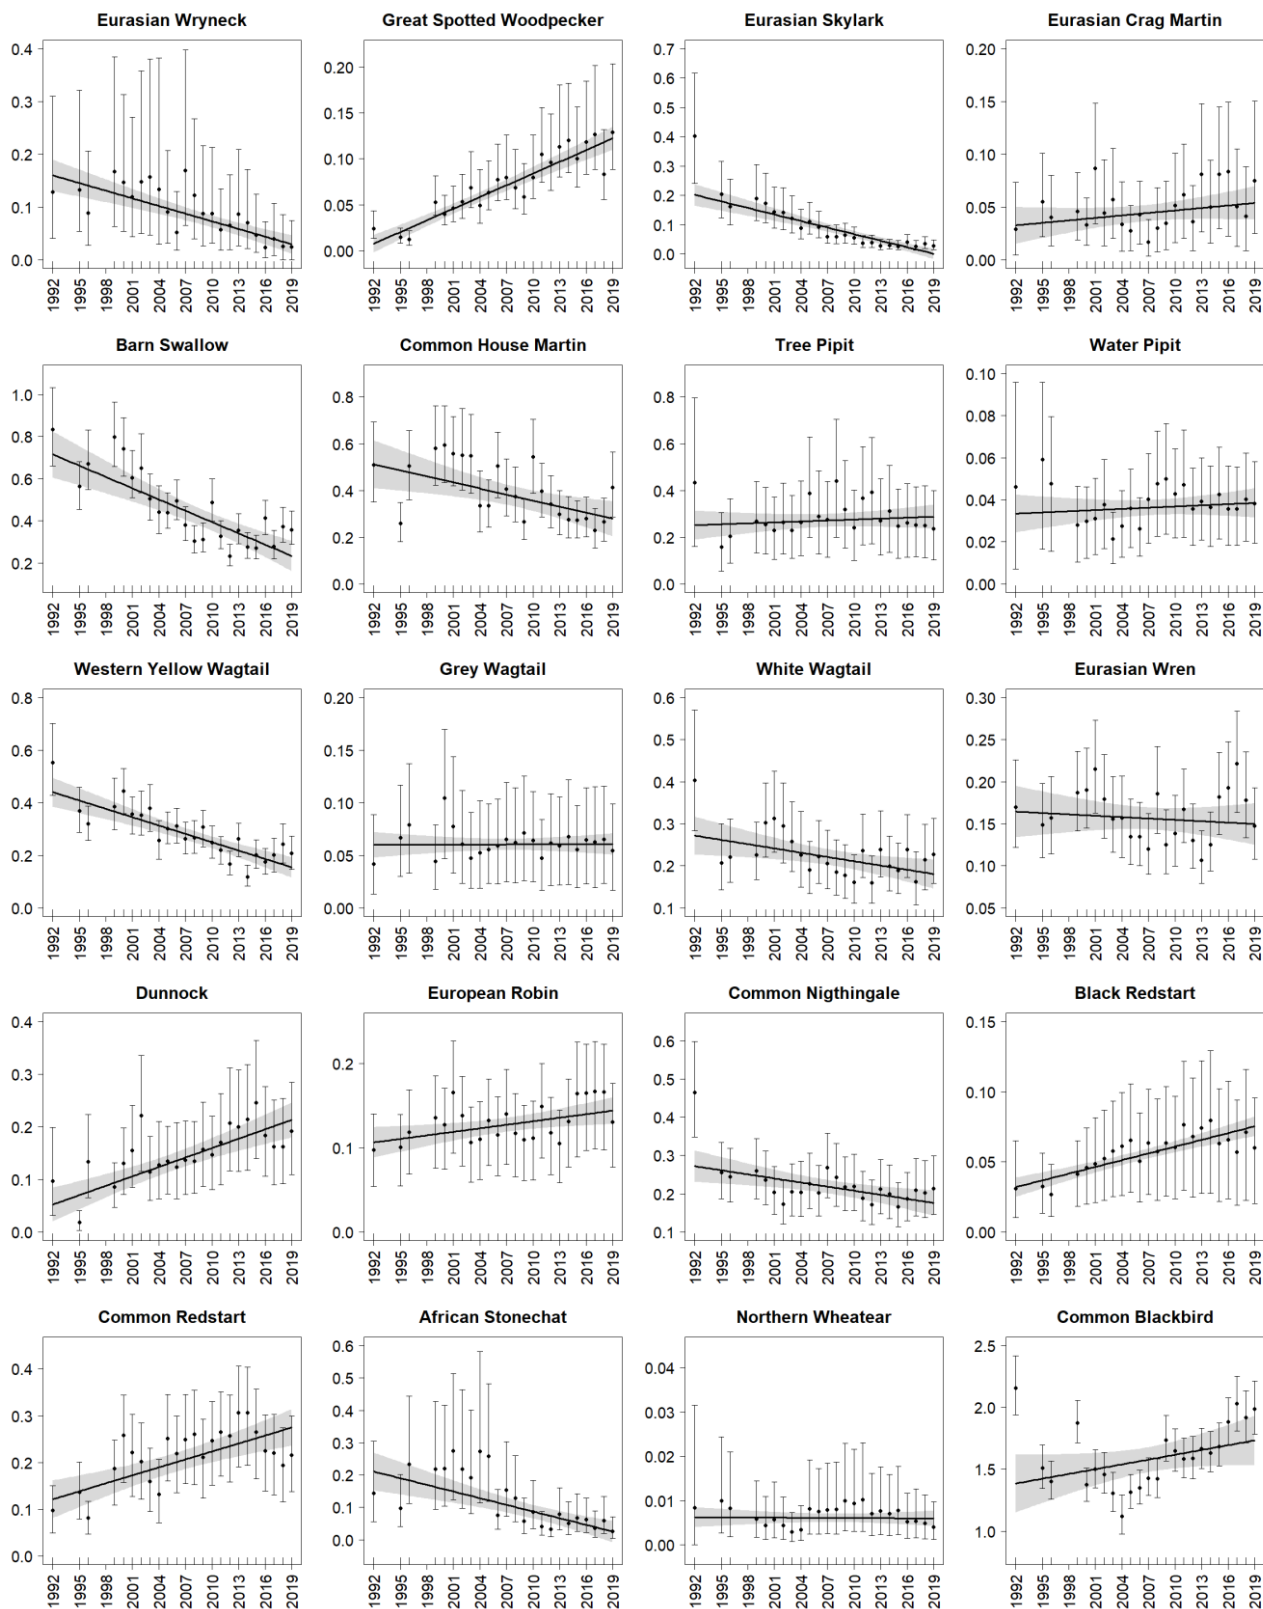

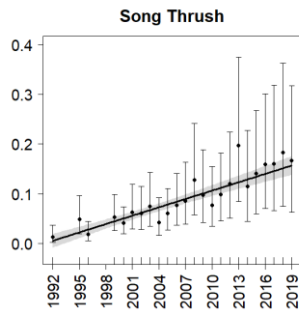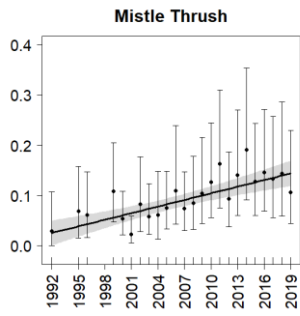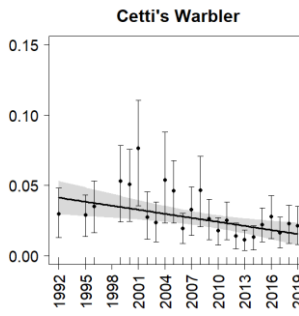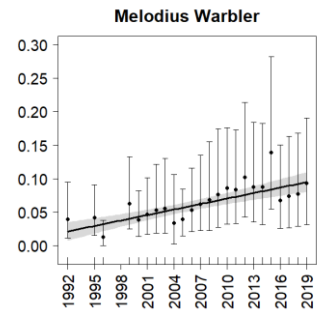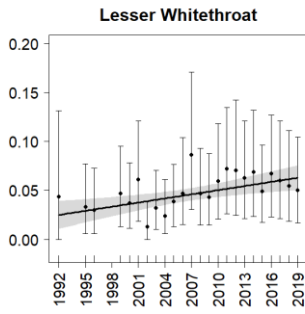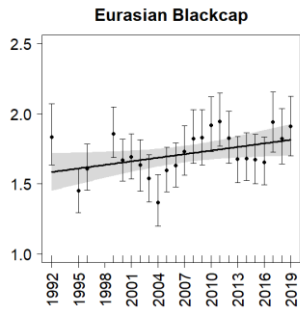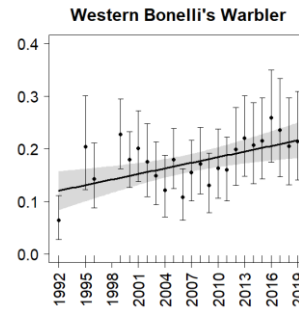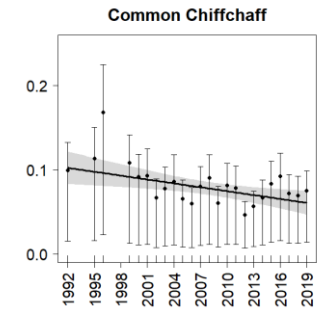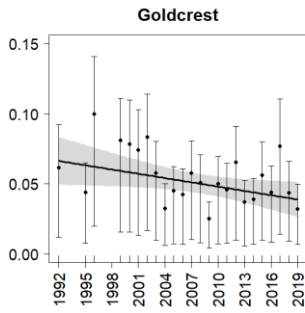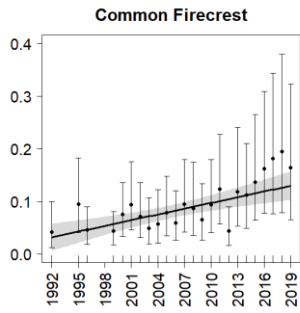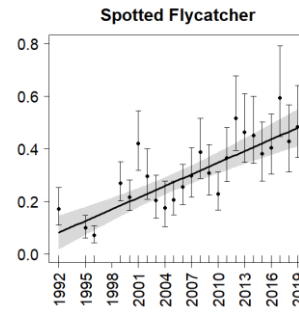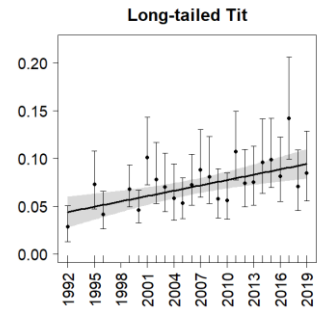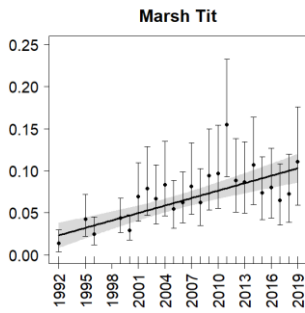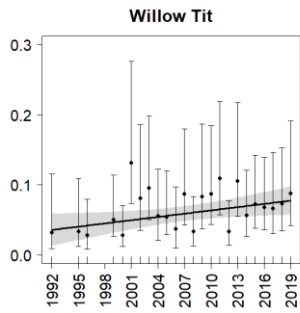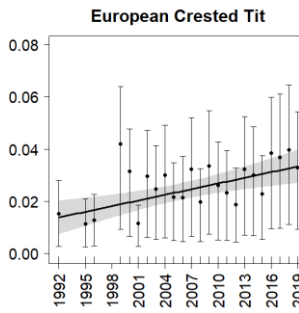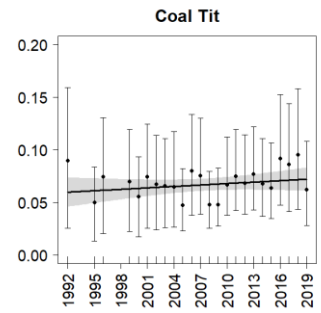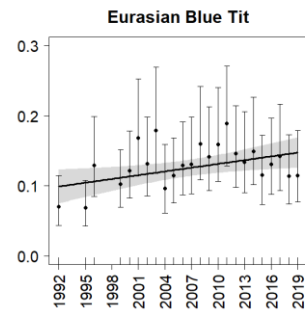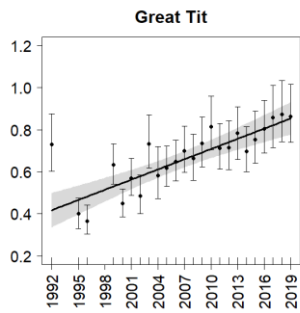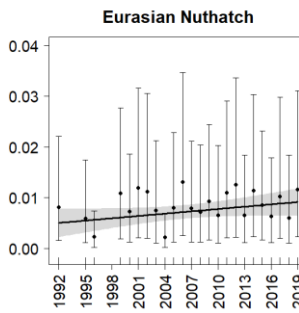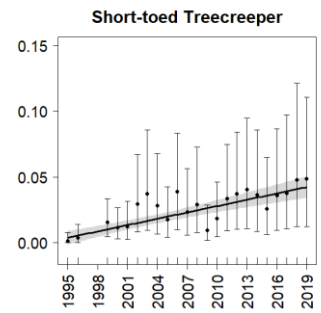

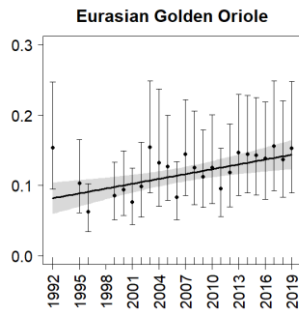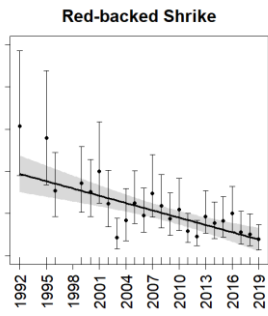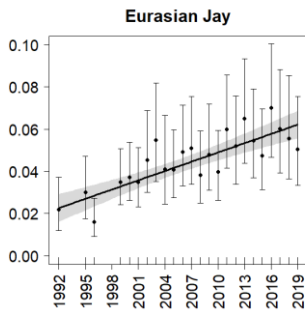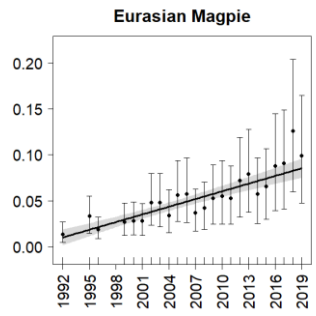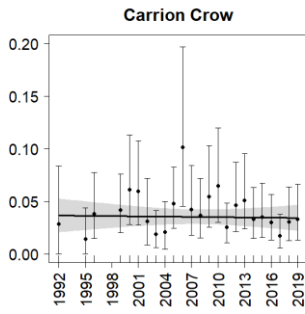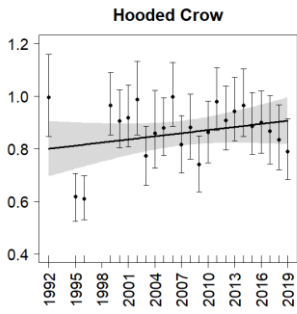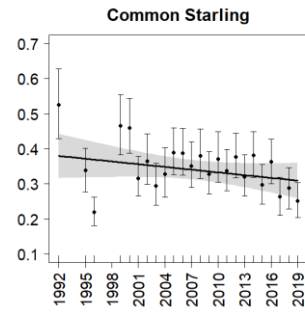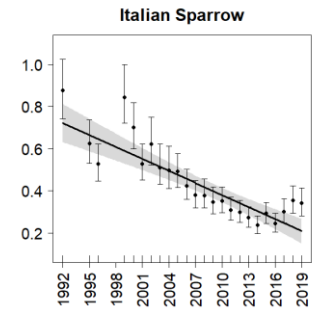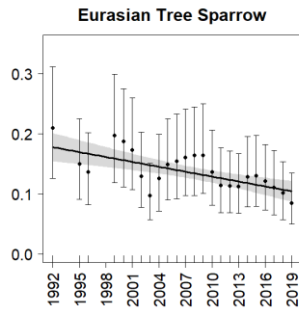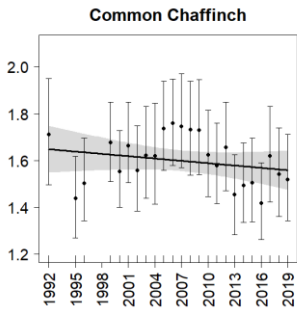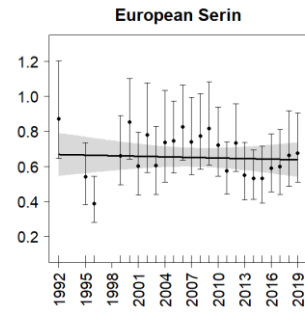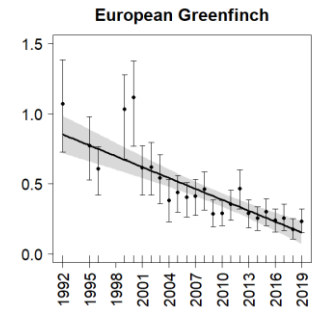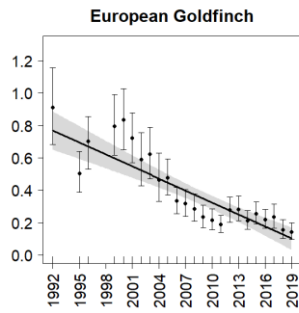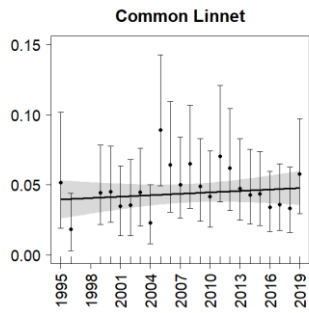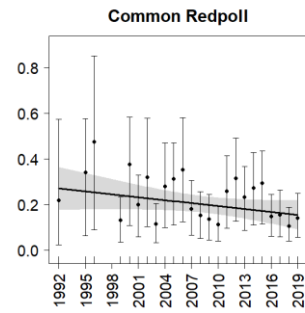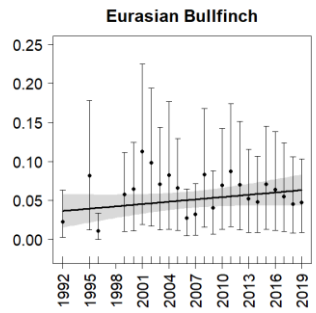

Supplement: s1 [file s1]
